1 **Web-based histology reference atlas for the freshwater crustacean *Daphnia magna***

2

3 **Short title: Web-based *Daphnia* histology reference atlas**

4

5 Mee S. Ngu<sup>1,2</sup>, Daniel J. Vanselow<sup>1,2</sup>, Carolyn R. Zaino<sup>1,2</sup>, Alex Y. Lin<sup>1,2</sup>, Jean E. Copper<sup>1,2</sup>,  
6 Margaret J. Beaton<sup>3</sup>, John K. Colbourne<sup>4</sup>, Keith C. Cheng<sup>1,2,\*</sup>, Khai C. Ang<sup>1,2,\*</sup>

7

8 <sup>1</sup>Department of Pathology, Pennsylvania State University College of Medicine, Pennsylvania,  
9 USA

10 <sup>2</sup>Jake Gittlen Laboratories for Cancer Research, Pennsylvania State University College of  
11 Medicine, Pennsylvania, USA

12 <sup>3</sup>Department of Biology, Mount Allison University, Sackville, Canada

13 <sup>4</sup>School of Biosciences, The University of Birmingham, Birmingham, UK

14

15 \*Corresponding authors:

16 Khai C. Ang ([kca2@psu.edu](mailto:kca2@psu.edu))

17 Keith C. Cheng ([kcheng76@gmail.com](mailto:kcheng76@gmail.com))

18

19

## 20 **Abstract**

21 *Daphnia*, an important model system for the study of evolution, development, phenotypic  
22 plasticity, and environmental health, lacks a modern reference atlas for microanatomy. To  
23 facilitate the comprehensive assessment of phenotypic effects of genes and environment, we  
24 created the *Daphnia* histology reference atlas (<http://daphnia.io/anatomy/>), a tractable, interactive  
25 web-based tool that provides insight into normal phenotype through vectorized annotations  
26 overlaid onto digital histology sections imaged at 40X magnification. Guided by our expert-  
27 curated and multimodal informed hierarchical anatomical ontology, we show that this resource  
28 can be used to elucidate sex-specific differences between female and male *Daphnia magna* in  
29 each of 3 orthogonal planes, providing new insight for the study of sex-specific traits. This atlas  
30 is a new, open-source resource for the *Daphnia* community to facilitate education and research  
31 collaboration, and as a precursor for the 3D atlas. It is also our intention that this atlas aids in  
32 phenotypic anchoring of large-scale biomolecular (multi-omics) data from comparative  
33 toxicological studies. Greater access to high-quality histological data may clarify cross-  
34 correlations between microanatomic and multi-omic phenotypes caused by genetic variation,  
35 environment, and disease across phylogeny.

## 37 **Introduction**

38 Keystone species of freshwater ecosystems (algae, zooplankton, fish) forming a food chain, are  
39 used in ecotoxicology as sentinels to monitor water quality, manage chemical risks to the  
40 environment, and serve as early warning signs of chemical health hazards that can cause human  
41 disease (1). *Daphnia*, a branchiopod micro-crustacean, is one of the most abundant zooplankters  
42 of lentic ecosystems around the globe and a model system in the fields of ecology and evolution  
43 (2,3). *Daphnia magna* primarily inhabit freshwater environments throughout the Northern  
44 Hemisphere and South Africa yet are distributed to laboratories around the globe as an  
45 established invertebrate model in ecotoxicology. It is sensitive to environmental contaminants,  
46 which impact its growth, reproduction, mobility, and mortality (4–6). It has been widely used as  
47 an indicator of water quality, assigned a role in setting regulatory criteria for toxicity testing by  
48 government agencies worldwide (7–10), and has assumed a central role in ecotoxicogenomics  
49 (11,12). Its extensive utilization for toxicological studies makes it important to establish a

50 comprehensive reference atlas to enable whole-organism phenotyping and characterization of the  
51 full range of cellular and molecular phenotypic responses to environmental contaminants.

52  
53 Histopathology permits the identification of cell- and tissue-specific changes in whole  
54 organisms, making it a powerful tool for detecting the adverse effects of toxicants. Multiple  
55 histopathology-based toxicological screens using fish (13–15) and aquatic invertebrates (16,17)  
56 have been reported. Ideally, the evaluation of toxic effects of chemicals, environmental  
57 contaminants, and pollutants identifies all affected cell types and organ systems so that the  
58 mechanisms underlying adverse outcomes and disease can be accurately predicted and better  
59 understood. However, identification of these toxic effects requires prior knowledge of normal  
60 structure, which can be most readily facilitated through atlases in the field of medicine (18) and  
61 comparative biology (19). Atlases provide a systematic approach for understanding the  
62 anatomical and histological context of all cells and tissues in both normal and diseased states.  
63 This systematic approach is more useful and accessible by the research community and the  
64 public with the web-based, open-source platform. Web-based reference atlases of various model  
65 organisms (e.g., zebrafish at <http://bio-atlas.com/zebrafish/>, *Caenorhabditis elegans* at  
66 [www.wormatlas.org](http://www.wormatlas.org), and mouse brain at <http://mouse.brain-map.org>) are valuable resources and  
67 tools for research and education.

68  
69 With histology as the foundation for understanding normal anatomy, we present a web-based  
70 histology reference atlas of *D. magna*. This atlas is an extensive collection of high-resolution  
71 virtual slides for both male and female *D. magna* in three orthogonal planes (coronal, sagittal,  
72 and transverse), accompanied by a systematic and hierarchically organized anatomical ontology.  
73 The interactive viewer of this atlas enables visualization of virtual slides up to 40X magnification  
74 and highlighting of anatomical structures with corresponding labels, which allows for quick  
75 structure identification. This feature allows visualization and comparison of sexual-dimorphic  
76 traits in *Daphnia* reproduced parthenogenetically (20,21). This atlas serves as the foundation for  
77 the development of a comprehensive 3D atlas. It will also serve as a foundation for spatial  
78 biology to assess the toxicological phenotypic effects of pollutants that complement non-targeted  
79 biomolecular approaches, thereby enabling a fuller understanding of the causal links to adversity  
80 using sentinel organisms.

81

## 82 Results and discussion

83 The overall strategy of the *Daphnia* Histology Reference Atlas (DaHRA) involved designing a  
84 casting mold to ensure consistency in sample orientation for histology sectioning in any of the  
85 three orthogonal orientations, optimizing sample preparation and staining for histology, labeling,  
86 and digital segmentation of anatomical structures, and constructing a web interface for the  
87 presentation of histological data and annotation (Figure 1).

88

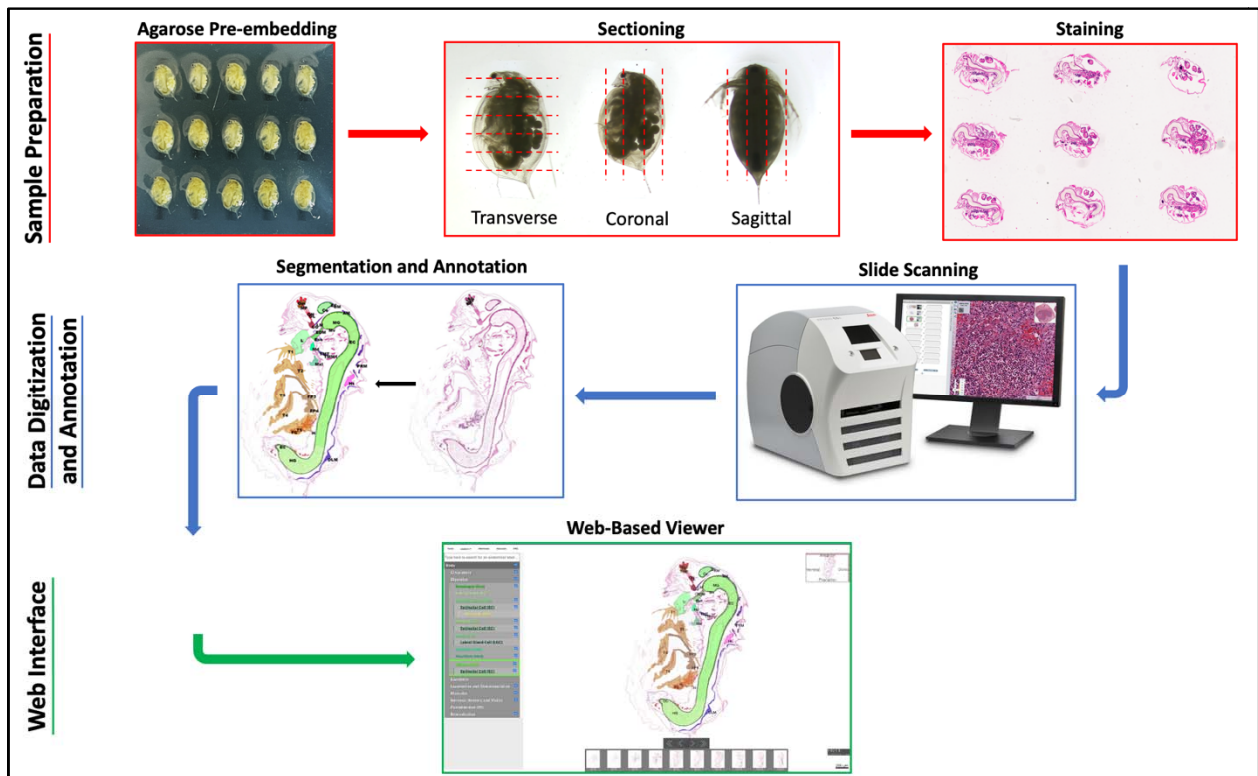

89

90 **Figure 1. Overview of the strategy for generating DaHRA.** Positioning of Bouin's-fixed  
91 *Daphnia* samples was facilitated using agarose block cast from a specialized casting mold to  
92 achieve near orthogonal alignment for histology sectioning. After processing and sectioning,  
93 hematoxylin and eosin-stained slides were digitalized and representative images were selected  
94 for labeling and segmentation of anatomical structures. Finally, annotations and virtual images  
95 were  
96 presented in the web-based viewer.

97

98 **Triangle casting mold for agarose pre-embedding**



99 Precise and consistent orientation of samples in paraffin is critical for achieving near orthogonal  
100 alignment. To this end, samples were pre-embedded in agarose blocks prior to downstream tissue  
101 processing for paraffin embedding. Specialized casting molds were engineered for this study to  
102 produce agarose blocks with wells that house individual *Daphnia* samples. Casting molds with  
103 three different teeth designs: sloped rectangle, triangle, and rectangle, were tested for efficacy  
104 (S1 Fig.). The dimensions of each mold (24 mm X 29 mm) are slightly smaller than the tissue  
105 cassettes (27 mm X 31mm) used for tissue processing. Molds were printed using  
106 stereolithography (3D-SLA). 3D-SLA printing at 25  $\mu\text{m}$  resolution creates a smooth surface for  
107 the mold, allowing the agarose block to be peeled off easily. Spacing of 1 mm between teeth  
108 ensured adequate rigidity between wells, while mold thickness of at least 4 mm provided an  
109 adequate surface for taping to hold molten agarose. Embedding trials with different casting  
110 molds concluded that “triangle mold” with teeth length of 4.5 mm, and height and width of 1.5  
111 mm (Figure 2A-B, STL file in S1 File) allowed precise positioning of *D. magna* samples with  
112 ease and yielded consistent orthogonal orientation of histological sections (Figure 2G).  
113

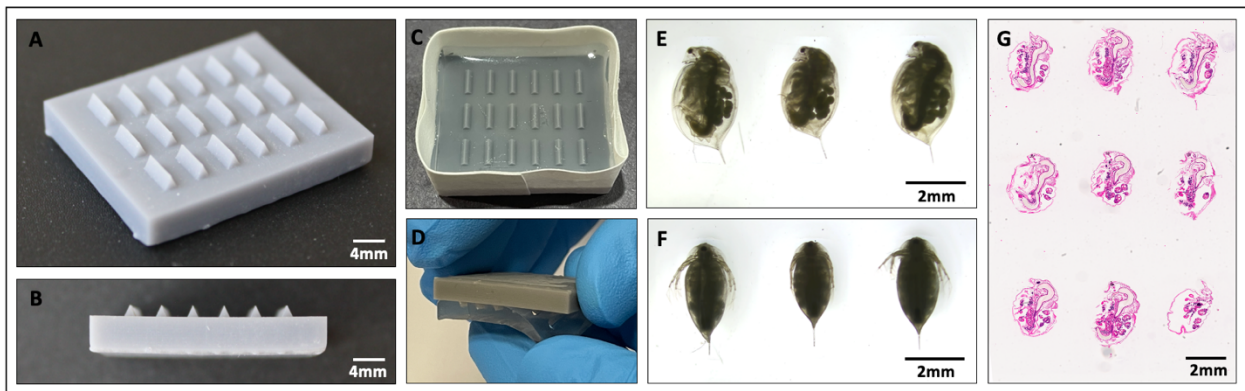

114  
115 **Figure 2. Agarose embedding using casting mold for histological processing.** (A) Top view  
116 and (B) side view of “triangle mold” printed by stereo-lithography (3D-SLA). (C) Casting 1%  
117 agarose block in the taped mold. (D) Agarose block being removed from the mold after  
118 solidification by peeling the gel downwards. (E) *Daphnia magna* samples were laid on their  
119 sides with a swimming antenna in the wells, the rostra facing the same direction for sagittal plane  
120 sectioning, and (F) laid on their back in the wells for coronal and transverse plane sectioning.  
121 (G) The histological section showed the position of samples at a similar plane.

122

123 **Bouin’s is a fixative of choice for *Daphnia* histology**

124 The accurate representation of histological microanatomy depends upon the preservation of  
125 tissue structure with minimal distortion and optimal staining that allows a clear distinction  
126 between different cell types and subcellular structures. Chemical reactions between fixatives and  
127 biological tissue result in distortions known as fixation artifacts. To minimize these artifacts, we  
128 evaluated the effectiveness of three common fixatives; Bouin's solution, 4% Paraformaldehyde  
129 (PFA), and 10% Neutral Buffered Formalin (NBF), and assessed changes in tissue volume and  
130 architecture, the extent of tissue preservation, and clarity of cell boundaries. Histology sections  
131 of *D. magna* samples fixed with Bouin's solution at room temperature for 48 hours showed the  
132 best fixation and nuclear clarity. Preservation by Bouin's solution provided clearer cell  
133 boundaries that allowed easier distinction between nerve fibers and cells in the optic lobe (OL)  
134 and cerebral ganglion (CG) (Figure 3A). Poor fixation is commonly encountered in the gut,  
135 presumably due to the presence of digestive enzymes (22). Bouin's solution resulted in good gut  
136 fixation where microvilli were present along the majority of the intestinal lumen and nucleoli in  
137 the gut epithelial cells were also more distinct (Figure 3B Inset). Nurse cells and yolk granules  
138 were more intact in the ovaries (Figure 3C), and cellular features across the developing embryos  
139 are generally more distinct (Figure 3D). Overall, Bouin's solution provided consistent fixation  
140 throughout the whole sample and yielded good preservation across tissue and cell types (see S3  
141 Fig. for the result of fixation by 4% PFA and 10% NBF).

142

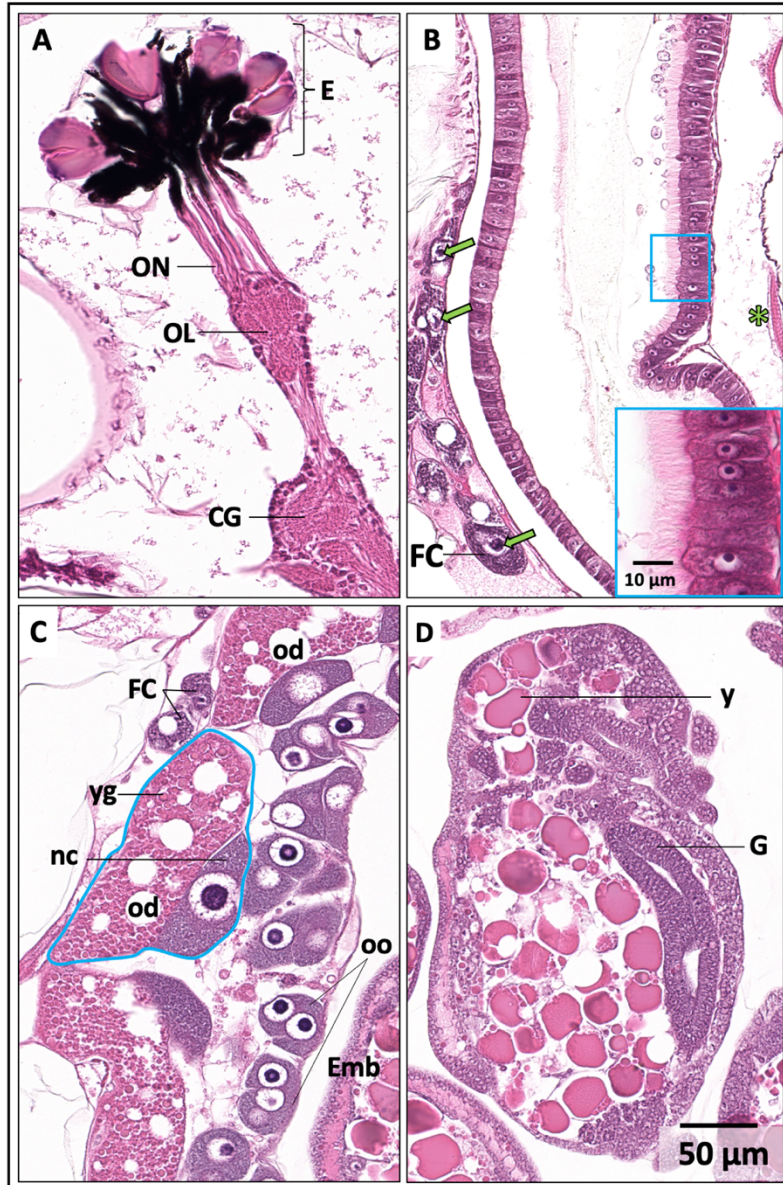

143

144 **Figure 3. Fixation by Bouin's solution allows visualization of cellular details across**  
145 **anatomical structures:** (A) nerve fibers and cells in the optic lobe (OL) and cerebral ganglion  
146 (CG), (B) microvilli and nucleoli of the epithelial cells (inset) in the midgut, nucleoli in the fat  
147 cells (FC) (arrows) and muscle striations (asterisk), (C) yolk granules (yg) and nurse cell (nc) in  
148 an ovarian egg (outlined in blue), and (D) developing embryo in the brood chamber. Emb,  
149 embryo; G, gut precursor; od, oil droplet; oo, oocytes.  
150

## 151 Segmentation of anatomical structures for DaHRA

152 For each plane, a subset of virtual images derived from one serially sectioned *Daphnia* is  
153 selected for the labeling and segmentation of its anatomical structures. The segmentation,  
154 accompanied by the anatomical ontology and color-coded based on organ systems (S2 File),

155 results in interactive color overlays on the atlas. Our anatomical terminology for the ontology is  
156 modified from the extensive work of Fryer (1991). To ensure consistency and relevancy of the  
157 ontology with current research, we also cross-referenced the extensive work of Fryer (1991) with  
158 other published literature (23–49). This systematic review aided our segmentation of each  
159 anatomical structure. We also checked for the congruency of each segmented structure in the  
160 three orthogonal histology planes. Accurate segmentation of some substructures such as  
161 exopodite, epipodite, and endite of the thoracic limbs, is particularly challenging in histology  
162 images. To minimize the inaccuracy in annotation, some of the substructures are not labeled  
163 individually. To overcome the limitations of histology, we are generating and incorporating 3D  
164 data into this atlas to enhance structural and morphological details. We will continue to update  
165 this atlas as more images are generated and with feedback from the *Daphnia* scientific  
166 community.

167

## 168 **Interactive viewer for DaHRA**

169 DaHRA (<http://daphnia.io/anatomy/>) presents 40X magnification digital scans of ~5 µm thick  
170 histological sections generated from serially sectioned *D. magna* of both sexes in three  
171 orthogonal planes (coronal, sagittal, and transverse). A viewer was developed to combine digital  
172 scans and annotations into a seamless experience to provide user-friendly access to high-  
173 resolution data. In the viewer, anatomical ontology is listed on the left, in a hierarchical tree that  
174 can be expanded and collapsed (Figure 4). A check in the checkbox indicates that the structure is  
175 labeled with a corresponding color overlay. Structures with underlined labels indicate at least one  
176 nested substructure (for example, “microvilli” under “epithelial cell”, both under “midgut”).  
177 Hovering over a structure dynamically highlights the corresponding structure or structure groups  
178 in the viewer, temporarily hiding other checked structures. The search function above the  
179 ontology assists in finding the structure in the list.

180



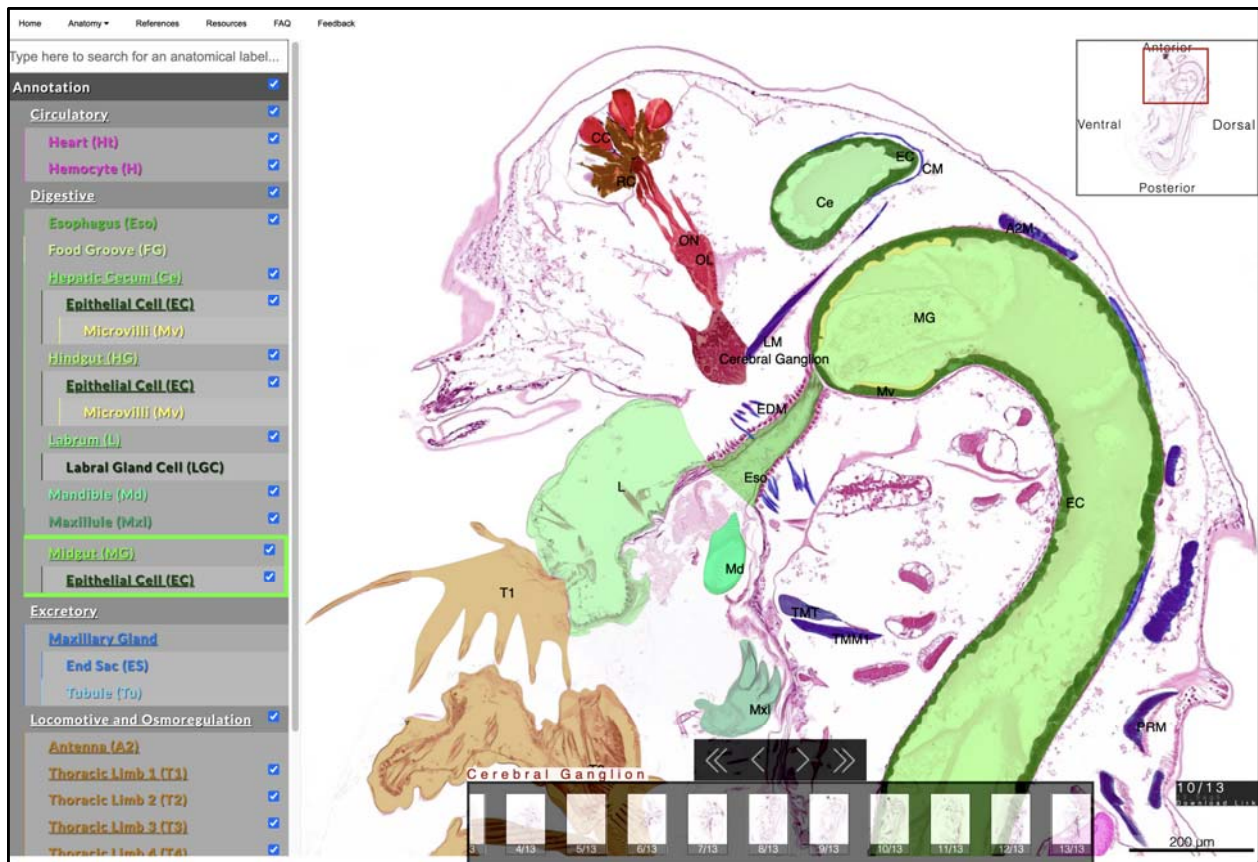

181  
182

183 **Figure 4. Overview of the interactive web-based viewer for DaHRA.** The left pane of the  
184 viewer includes an expandable hierarchical tree of anatomical structures; the checked boxes  
185 indicate which structures are labeled in the image. The image shows acronym labels; hovering  
186 the mouse cursor over an acronym or its corresponding region will bring up the structure's full  
187 name. Unchecking a box will eliminate the corresponding color overlay and annotation.  
188

189 In the image portion of the viewer, all available color overlays and acronym labels are on display  
190 by default (indicated by checked checkboxes) (Figure 4). Hovering the mouse cursor over a  
191 colored region on the image will display its full name. Clicking on the colored region will  
192 change the colored overlay to highlight the border only. While images with interactive  
193 highlighting of anatomical structures assist in structure identification, additional unannotated  
194 images of serially sectioned *D. magna* are categorized under 'Full Series'. All the files (.ai, tiff,  
195 SVG) for exploring the atlas are freely available for download.

196

197 A video clip demonstrating the features of the atlas (S 3 File) can be found on the landing page  
198 of the atlas (<http://daphnia.io/anatomy/>). The atlas also contains a list of *Daphnia*-specific

199 glossary and protocols used in generating this atlas under the “Resource” tab. The “Reference”  
200 tab contains a list of published literature used in cross-referencing *Daphnia* anatomy. To enable  
201 collaborative effort with the scientific community, keep the atlas relevant to scientific progress  
202 and ensure the accuracy of the atlas content, the “Feedback” tab provides a platform for users to  
203 leave comments and suggestions.

204

## 205 ***Daphnia magna* anatomy**

206 *Daphnia* has been the subject of biological and ecological studies (2,30,50). Studies on its  
207 functional anatomy, physiology, and development are extensive, however, histology images are  
208 not widely available. DaHRA presents the first extensive collection of high-resolution virtual  
209 slides of both sexes of *D. magna*, a comprehensive visualization platform to interrogate *Daphnia*  
210 anatomy. Representative images from each of the three orthogonal planes showing the most  
211 anatomical structures of females (Figure 5-7) and males (Figure 8-10) are presented below with a  
212 brief description and links to the atlas for the color-overlays.

213

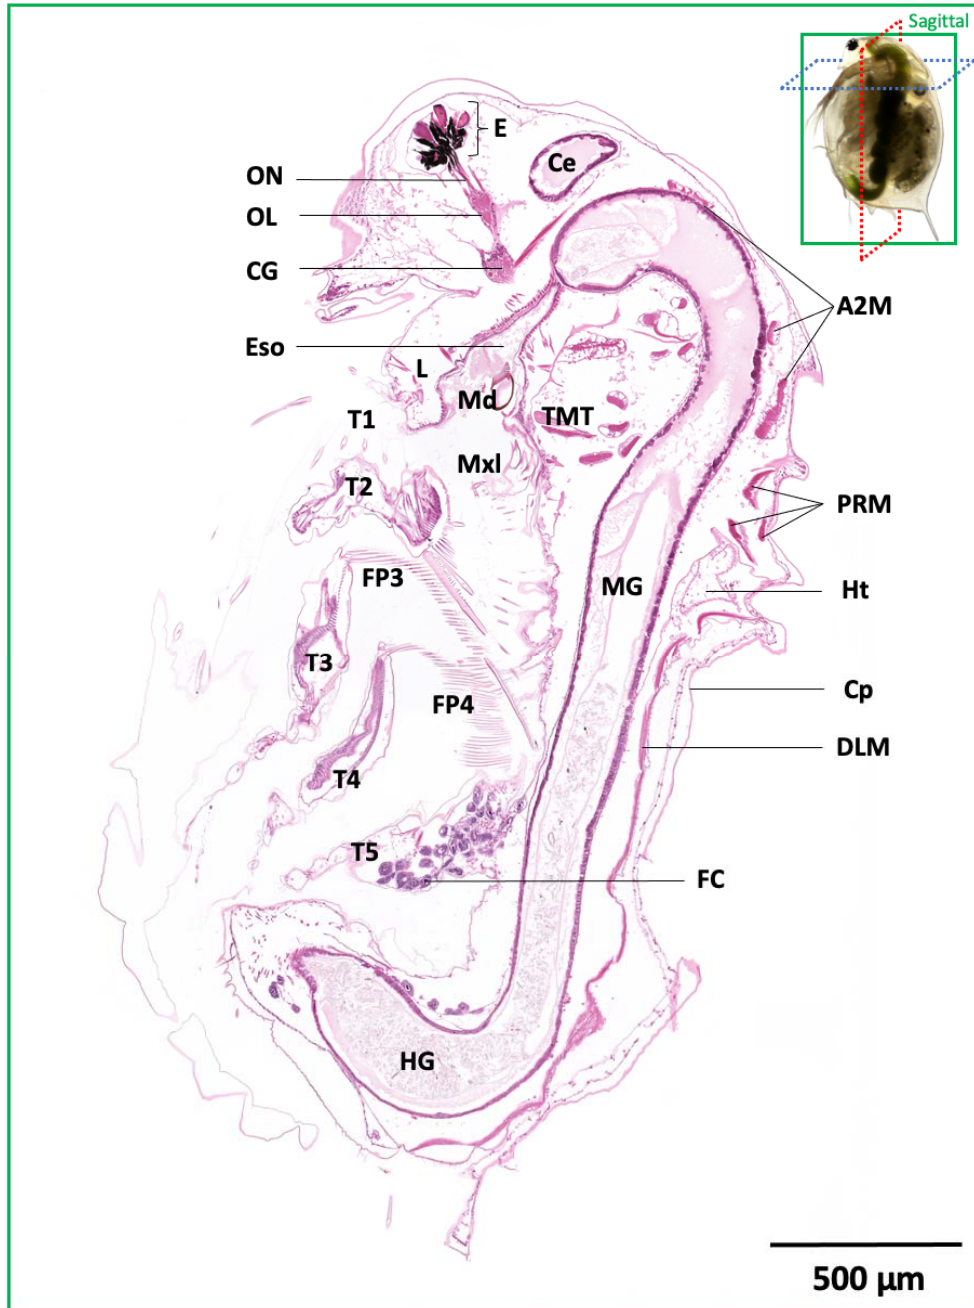

214  
215  
216  
217  
218  
219  
220  
221  
222  
223  
224

**Figure 5. Representative image showing anatomical structures of female *D. magna* in the sagittal plane.** The sagittal plane at the approximate median section displays the connection of compound eye (E) to optic lobe (OL) and cerebral ganglion (CG) by optic nerves (ON). The labrum (L), maxillule (Mxl), and mandible (Md) are anterior to the esophagus (Eso) that opens into the midgut (MG) and is followed by the hindgut (HG). This section also cuts through the five thoracic limbs (T1-5) with filter plates (FP3, FP4), the antennal muscles (A2M), the posterior rotator muscle of mandibles (PRM), the heart (Ht), and shows the extent of dorsal longitudinal muscle (DLM) along the gut. Other features seen include the carapace (Cp), hepatic cecum (Ce), fat cells (FC), and transverse mandibular tendon (TMM). Corresponding atlas link: [http://daphnia.io/anatomy/histology/?t=sagittal\\_female&z=10](http://daphnia.io/anatomy/histology/?t=sagittal_female&z=10)



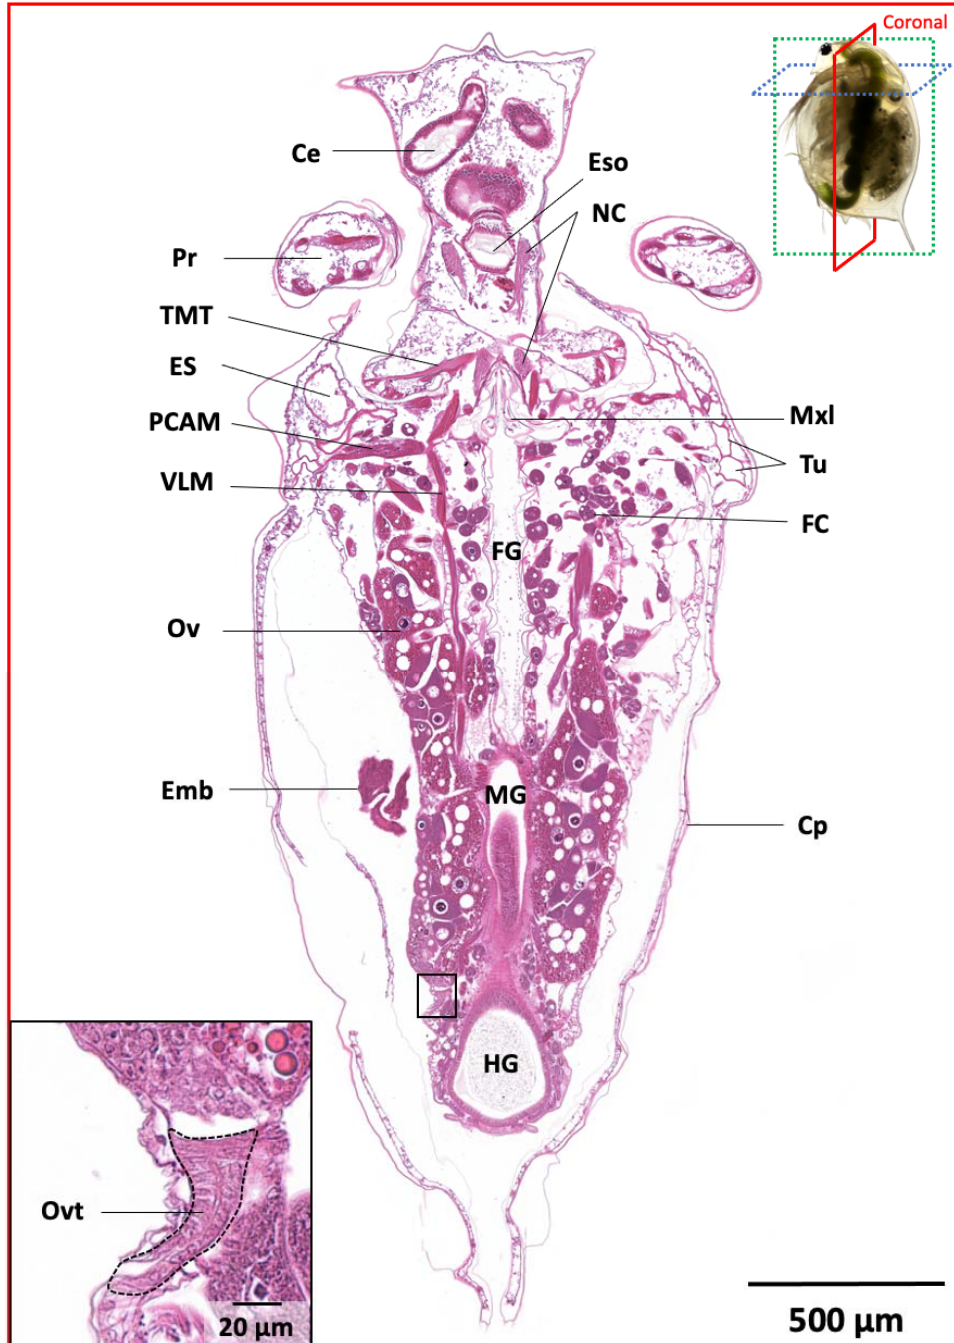

225

226

227

228

229

230

231

232

233

234

235

**Figure 6. Representative image showing anatomical structures of female *D. magna* in the coronal plane.** The coronal plane displays most of the structures in pairs, for example, the protopodites (Pr) of the swimming antennae, hepatic ceca (Ce), maxillules (Mxl), nerve cords (NC), transverse mandibular tendons (TMT), ovaries (Ov), and ventral longitudinal muscles (VLM). It also shows the food groove (FG) that channels food to the maxillules. Other features seen include the carapace (Cp), the end sac (ES) and tubules (Tu) of the maxillary gland, the midgut (MG), the abundant fat cells (FC), the hindgut (HG), and a portion of an embryo (Emb) in the brood chamber. Inset showing the oviduct (Ovt; dotted circle). Corresponding atlas link: [https://daphnia.io/anatomy/histology/?t=coronal\\_female&z=10](https://daphnia.io/anatomy/histology/?t=coronal_female&z=10)

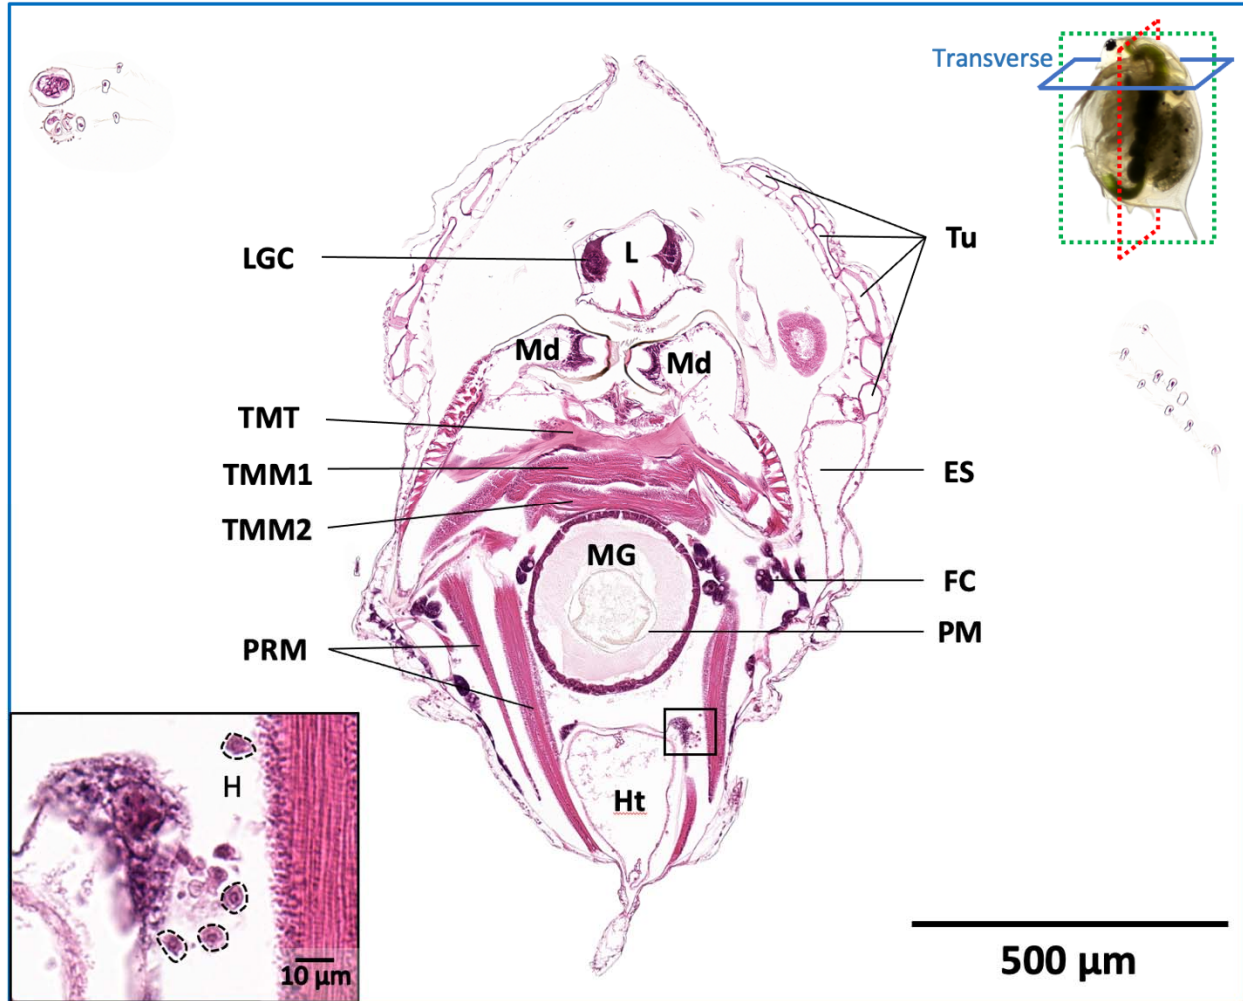

236  
237  
238  
239  
240  
241  
242  
243  
244  
245  
246  
247  
248

**Figure 7. Representative image showing anatomical structures of female *D. magna* in the transverse plane.** The transverse plane shows the asymmetrical paired mandibles (Md) with the transverse mandibular tendons (TMT), transverse mandibular muscles (TMM1), transverse muscles of mandibles (TMM2), and the posterior rotator muscles of mandibles (PRM). Other features seen include the labrum (L) that houses labral gland cells (LGC), end sac (ES) and tubules (Tu) of the maxillary gland, midgut (MG) with the peritrophic membrane (PM), and the heart (Ht). Inset displays several hemocytes (H) outlined by dotted circles.

Corresponding atlas link: [http://daphnia.io/anatomy/histology/?t=transverse\\_female&z=10](http://daphnia.io/anatomy/histology/?t=transverse_female&z=10)

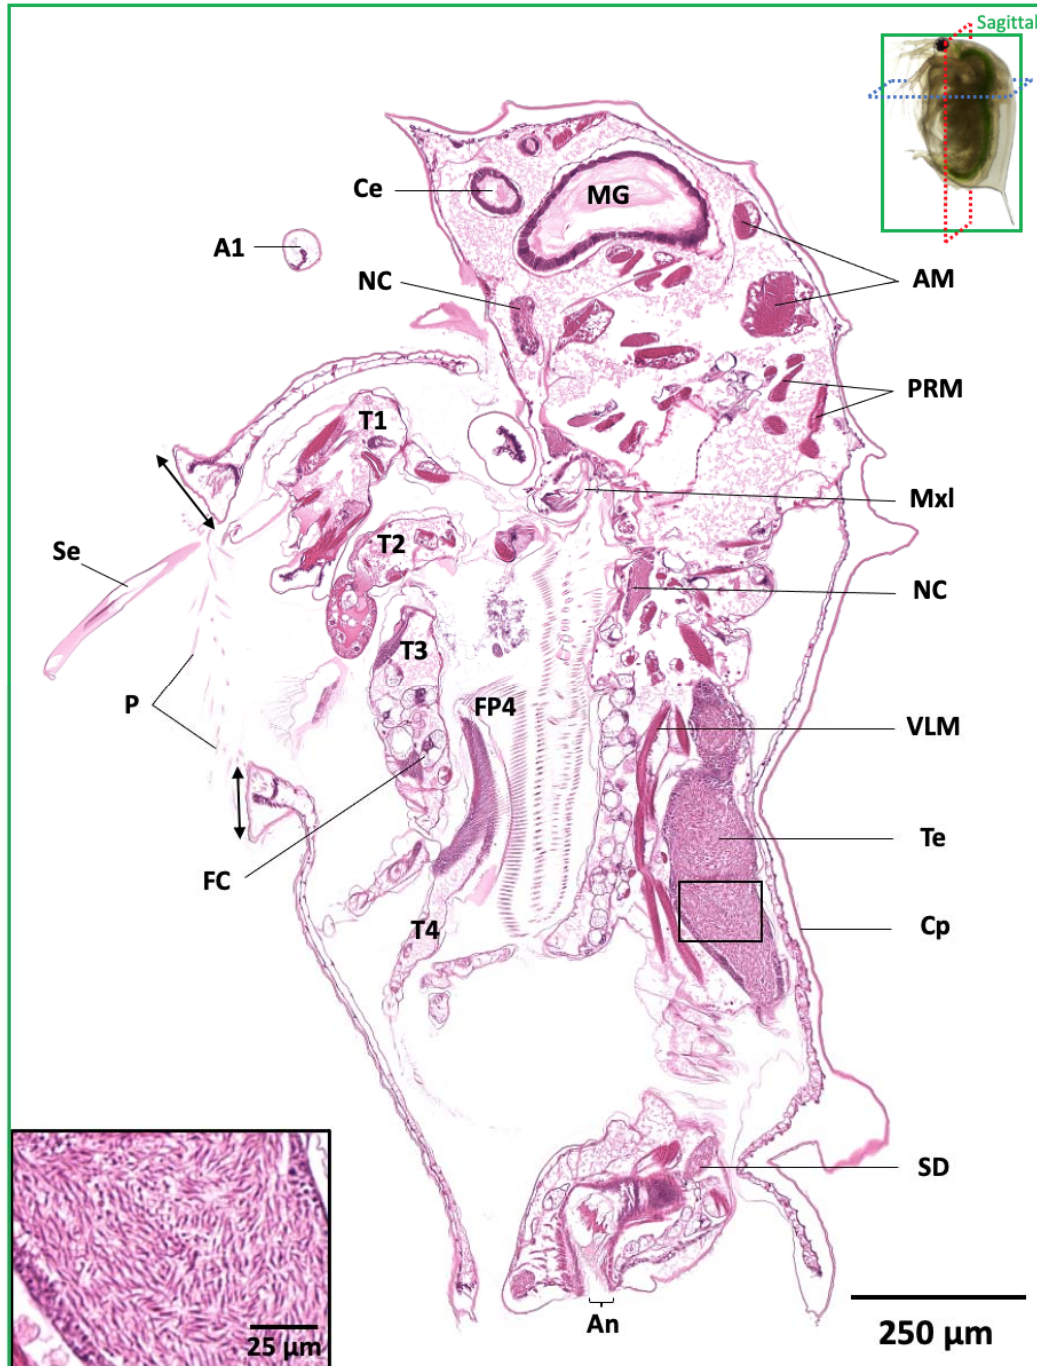

249  
250  
251  
252  
253  
254  
255  
256  
257  
258

**Figure 8. Representative image showing anatomical structures of male *D. magna* in the sagittal plane.** The sagittal plane shows the elongated seta (Se) on the first thoracic limb, pubescence (P) at the wider ventral opening of the carapace, thickening of carapace at the ventral opening (arrows), one of the testes (Te), and a small portion of sperm duct (SD). Inset showing the spermatozoa in the testis. A1, antennule; A2M, antennal muscle; An, anus; Ce, hepatic cecum; Cp, carapace; ES, end sac of the maxillary gland; FC, fat cell; FP4, filter plate 4; Ht, heart; L, labrum; Md, mandible; MG, midgut; Mxl, maxillule; NC, nerve cord; PRM, posterior rotator muscle of mandible, T1-4, thoracic appendage 1-4; VLM, ventral longitudinal muscle. Corresponding atlas link: [http://daphnia.io/anatomy/histology/?t=sagittal\\_male&z=3](http://daphnia.io/anatomy/histology/?t=sagittal_male&z=3)



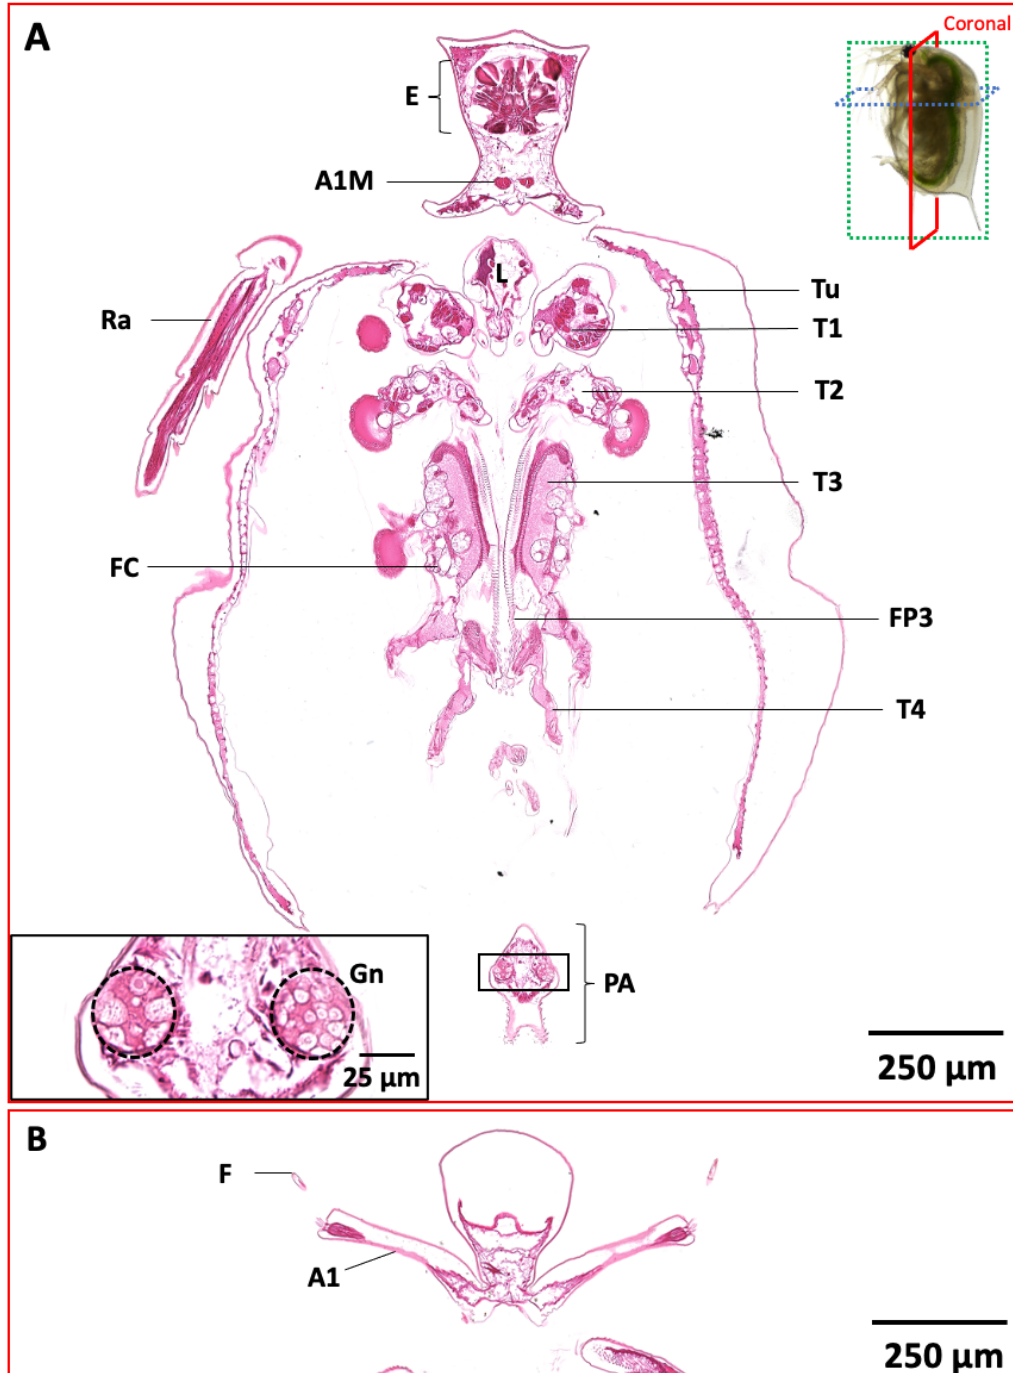

259  
260  
261  
262  
263  
264  
265  
266  
267  
268

**Figure 9. Representative images showing anatomical structures of male *D. magna* in the coronal plane.** (A) This coronal section shows the antennule muscles (A1M) that are only present in the male, the first four paired thoracic limbs (T1-T4), and the gonopores (Gn, dotted circles in inset) on the postabdomen (PA). (B) This section, slightly ventral to panel A, displays the prominent and elongated antennules (A1) with flagella (F) at the tip. E, compound eye; FC, fat cell; FP3, filter plate 3; L, labrum; Ra, ramus of swimming antenna; Tu, tubule of the maxillary gland. Corresponding atlas links:

(A) [https://daphnia.io/anatomy/histology/?t=coronal\\_male&z=4](https://daphnia.io/anatomy/histology/?t=coronal_male&z=4)

(B) [http://daphnia.io/anatomy/histology/?t=coronal\\_male&z=2&c=0.2,0.14,0.6,0.4](http://daphnia.io/anatomy/histology/?t=coronal_male&z=2&c=0.2,0.14,0.6,0.4)

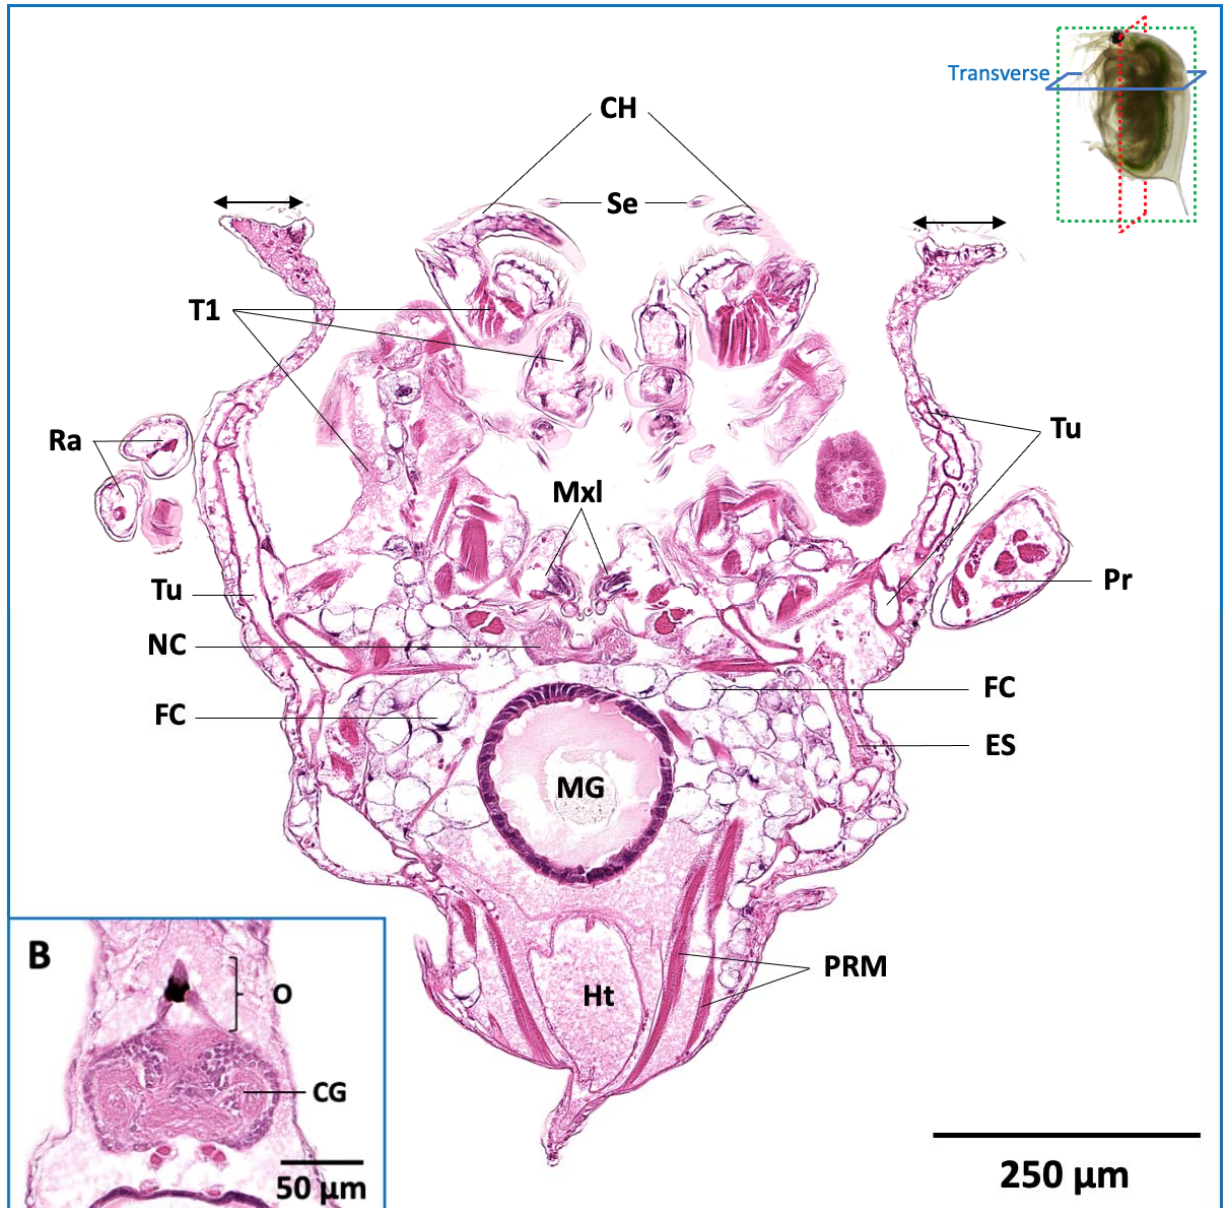

269  
270 **Figure 10. Representative image showing anatomical structures of male *D. magna* in the**  
271 **transverse plane. (A)** This transverse section displays the paired copulatory hooks (CH) and  
272 elongated setae (Se) on the first thoracic limbs (T1), with pubescence and thickening of the  
273 carapace (arrows) at the ventral opening. This also shows the abundance of fat cells (FC) around  
274 the midgut (MG). Cp, carapace, ES, end sac of the maxillary gland; Ht, heart; L, labrum; Mxl,  
275 maxillule; NC, nerve cord; PRM, posterior rotator muscle of mandible; Pr, protopodite of  
276 swimming antenna; Ra, ramus of swimming antenna; Tu, tubule of the maxillary gland. (B)  
277 Pigmented ocellus (O) is shown to be connected to the cerebral ganglion (CG). This transverse  
278 section is slightly above that of panel A.

279 Corresponding atlas links:

280 (A) [https://daphnia.io/anatomy/histology/?t=transverse\\_male&z=8](https://daphnia.io/anatomy/histology/?t=transverse_male&z=8)

281 (B) [http://daphnia.io/anatomy/histology/?t=transverse\\_male&z=4&c=0.43,0.25,0.18,0.12](http://daphnia.io/anatomy/histology/?t=transverse_male&z=4&c=0.43,0.25,0.18,0.12)

282

## 283 **Circulatory system**

284 *Daphnia* have an open circulatory system and a myogenic heart (42,43). The heart (Ht) has a pair  
285 of ostia situated immediately to the anterior of the brood chamber, between the midgut and  
286 dorsal surface (Figures 5, 7, 9). As *Daphnia* are semi-transparent, the beating heart and the flow  
287 of hemolymph (blood) containing hemocytes (H) or blood cells (Figure 7 inset) can be easily  
288 observed (24,38) under low magnification.

289

## 290 **Digestive system**

291 *Daphnia* is filter feeders. Food particles are filtered through filter plates (FP3 and FP4)  
292 consisting of setae on thoracic limbs 3 and 4, passed through maxillules (Mxl) and mandibles  
293 (Md) to enter the esophagus (Eso), which is the first part of the digestive system (Figures 5). The  
294 digestive system also consists of paired hepatic ceca (Ce), midgut (MG), and hindgut (HG)  
295 (Figures 5, 6, 7, 8, and 10) that are lined with epithelial cells and microvilli, with the columnar  
296 epithelial cells in the midgut and cuboidal cells in hepatic ceca and hindgut (40,44). The labrum  
297 (L) houses labral gland cells (LGC) that have been suggested to be involved in food ingestion  
298 and endocrine function (48,49) (Figures 5, 7, and 9).

299

## 300 **Excretory system**

301 The maxillary gland, also known as the shell gland, is the organ of excretion of *Daphnia*, housed  
302 between the inner and outer walls of the carapace. It consists of an end sac (ES), a series of  
303 tubules (Tu), and an opening to the outside that is situated within the anterior part of the brood  
304 chamber (41) (Figures 6, 7, 9A, and 10A).

305

## 306 **Locomotive and osmotic regulation**

307 The second pair of antennae, also referred to as swimming antennae, is the primary organ of  
308 locomotion. Each swimming antenna has a protopodite (Pr), two rami (Ra) bearing setae (Se)  
309 (23) (Figure 6, 9A, 10A), and is supported by antennal muscles (A2M). *Daphnia* has five  
310 thoracic limbs (T1-T5) (26) (Figures 5, 8, and 9A). Movements of thoracic limbs produce a  
311 constant current that brings food particles into the digestive tract (25,51) and facilitates osmotic  
312 regulation, which occurs in the epipodite on each thoracic limb (35). First thoracic limbs in male

313 *Daphnia*, having elongated setae (Figure 8) and copulatory hooks (Figure 10A), are different  
314 from those in the female.

315

### 316 **Muscular system**

317 The muscular system is very prominent and occupies a significant portion of the body. The  
318 largest muscles are ventral and dorsal longitudinal muscles (VLM and DLM) that extend along  
319 the gut, three paired antennal muscles (A2M), transverse mandibular muscles (TMM1),  
320 transverse muscles of mandibles (TMM2), posterior rotator of the mandibles (PRM), carapace  
321 adductor muscles (ACAM and PCAM) (Figures 5, 6, 7 and 8), and followed by groups of  
322 muscles that allow the motion of thoracic limbs and postabdomen (27,51). Other small muscles  
323 include those around the compound eye (27,29), labrum (27), and esophagus (27). All muscles  
324 are striated and surrounded by sarcoplasm, which contains many nuclei and is mostly vacuolated.  
325 Sarcoplasm is particularly abundant and more vacuolated in the antennal muscles.

326

### 327 **Nervous, sensory, and vision system**

328 *Daphnia* has a pigmented compound eye (E) consisting of 22 ommatidia, derived from two eyes  
329 that fuse during embryonic development, and a small, pigmented ocellus (O) with three lens-like  
330 bodies (Figure 10B). The optic nerve (ON) of each ommatidium forms a parallel bundle that  
331 connects to the optic lobe of the cerebral ganglion (OL), which is then connected to the cerebral  
332 ganglion (CG) (Figure 5). The cerebral ganglion is connected to two chains of nerve cords (NC)  
333 that run along the thorax, underneath the gut, and reach other anatomical structures (36,37,45)  
334 (Figures 6, 8 and 9).

335

### 336 **Reproductive system**

337 The ovaries in females (Figure 6) and the testes in males (Figure 8) are paired and situated  
338 ventrally along the gut. *Daphnia* and all other species of the order Cladocera are cyclical  
339 parthenogens, which involve both sexual (meiotic) and clonal (ameiotic) reproduction (52).  
340 Under favorable environmental conditions, females reproduce parthenogenetically, and broods of  
341 genetically identical embryos will develop in the brood chamber before being released. Sexual  
342 reproduction is cued by environmental stress (often seasonal, including photoperiod,



343 temperature, and over-crowding) that triggers the production of genetically identical males  
344 instead of females. During this sexual phase of the *Daphnia* life cycle, females also switch to  
345 producing two haploid eggs. Unlike parthenogenetic embryos, the development of these sexually  
346 produced embryos is arrested at the 3000-cell stage (53) and enter into a state of dormancy while  
347 being encased within an ephippium that protects these embryos under diapause through harsh  
348 environmental conditions for decades and even centuries (54,55). These two ‘resting eggs’ are  
349 different from parthenogenetically produced eggs that can number up to 100 per brood.  
350 Parthenogenetic eggs contain multiple oil droplets (od) of varying size and yolk granules (yg)  
351 that are generally larger in size (34) (Figure 11).

352

353 Testes of male *Daphnia* consist of two long tubular structures connected to gonopores (Gn) or  
354 ejaculatory openings by sperm ducts (Figure 8). Spermatogenesis begins at the testes’ walls, and  
355 mature spermatozoa are displaced inward toward the central region of the testes (46).

356

357 Fat cells, which are polyploid (56), consist of a massive portion of lipid and glycogen (47), are  
358 abundant in healthy *Daphnia*. They are found along the gut, on the thoracic limbs, and around  
359 ovaries or testes (Figures 5, 6, 7, 8, 9A, and 10A). These cells are most likely sites of the  
360 vitellogenin synthesis (47). They have been implicated with epipodite cells (on thoracic limbs) in  
361 the synthesis of hemoglobin (32).

362

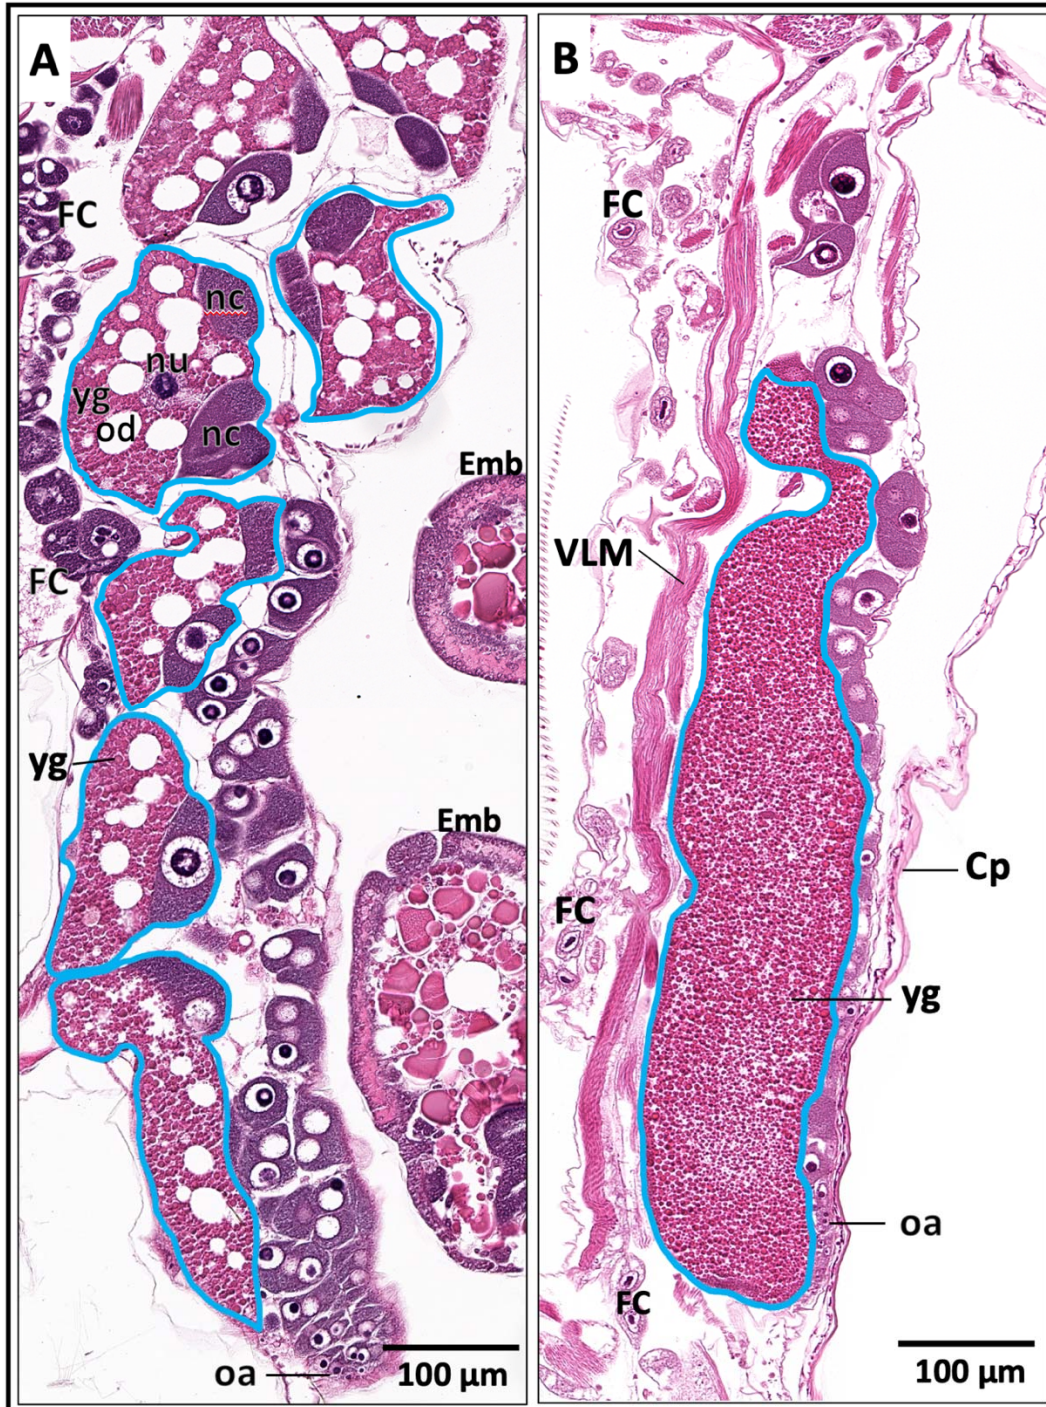

363

364 **Figure 11. Comparison of ovarian eggs in females reproducing parthenogenetically or**  
365 **sexually.** (A) The ovarian eggs of a female reproducing parthenogenetically contain a large  
366 amount of oil droplets (od) and yolk granules (yg) that are generally larger in size. (B) The  
367 ovarian egg of a female reproducing sexually contains a large proportion of fine yolk granules  
368 without oil droplets. Cp, carapace; Emb, embryo; FC, fat cell; nc, nurse cell; nu, the nucleus of  
369 oocyte; Oa, oogonia; VLM, ventral longitudinal muscle. A solid blue circle indicates an  
370 individual ovarian egg.  
371

## 372 **Sexual dimorphism in *Daphnia***

373 Due to the predominantly parthenogenetic life cycle of *Daphnia*, there is less information on  
374 male anatomy in contrast to the females. Our atlas provides the first detailed collection of  
375 histology images of male *Daphnia* that can contribute to the elucidation of sexual dimorphism in  
376 *Daphnia*. *Doublesex* genes (*Dsx1* and *Dsx2*) in *D. magna* had been reported to contribute to male  
377 sex determination and the development of male-specific structures (57–59). Time-lapse imaging  
378 (58) showed that most male-specific structures start developing during the early juvenile stage,  
379 except elongated antennules and the gonad. The male-specific expression had been detected in  
380 other anatomical structures, such as the compound eye (57) and skeletal muscles (58), of which  
381 sex difference has not been reported to date.

382  
383 Sexual dimorphism in *Daphnia* includes smaller male body size and male prominence and  
384 elongation of antennules (A1), uniquely with flagella (F) at their tips (Figure 9B). Male  
385 antennules carry muscles (A1M) (Figure 9A) that are absent in the females. The first thoracic  
386 limbs of the males are equipped with elongated setae (Figure 8) and chitinized copulatory hooks  
387 (Figure 10A) that are used for clasping females during copulation. The male post-abdomen has  
388 gonopores (Figure 9A inset) that are involved in transferring mature spermatozoa from the testes  
389 to the female in the region of the oviduct during copulation. One of the male-specific traits  
390 illustrated in our atlas is that besides having a wider opening at the ventral margin of the  
391 carapace, thickened and angular margins (indicated by arrows in Figures 8, 10A, and 12) are  
392 observed around the hairy opening in males. We also show that fat cells in males are  
393 comparatively different from those in females as they contain much larger lipid droplets, reduced  
394 and less granular cytoplasm, and smaller nucleoli that are usually situated at the periphery of the  
395 cell (Figure 13). We hope the field of spatial biology will be assisted by this atlas to add insight  
396 into the role of gene regulation, proteins, and other molecules in physiological function in the  
397 morphogenesis of sexual dimorphism in *Daphnia*.

398



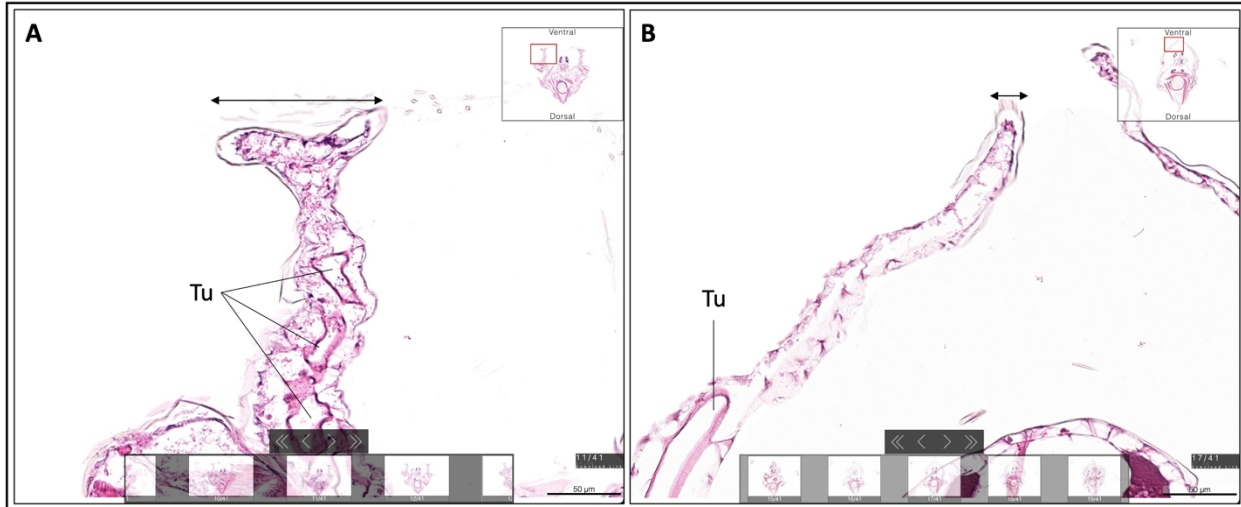

399  
400  
401  
402  
403  
404  
405

**Figure 12. Comparison of male and female carapace at the ventral opening. (A)** Thickening of the male carapace (arrow) at the ventral opening is shown as compared to that of the **(B)** female. Tu, Tubules of the maxillary gland. Corresponding atlas links:

(A) [http://daphnia.io/anatomy/histology/?t=transverse\\_male\\_88&z=11&c=0.23,0.105,0.23,0.18](http://daphnia.io/anatomy/histology/?t=transverse_male_88&z=11&c=0.23,0.105,0.23,0.18)

(B) [http://daphnia.io/anatomy/histology/?t=transverse\\_female\\_57&z=17&c=0.36,0.07,0.20,0.15](http://daphnia.io/anatomy/histology/?t=transverse_female_57&z=17&c=0.36,0.07,0.20,0.15)

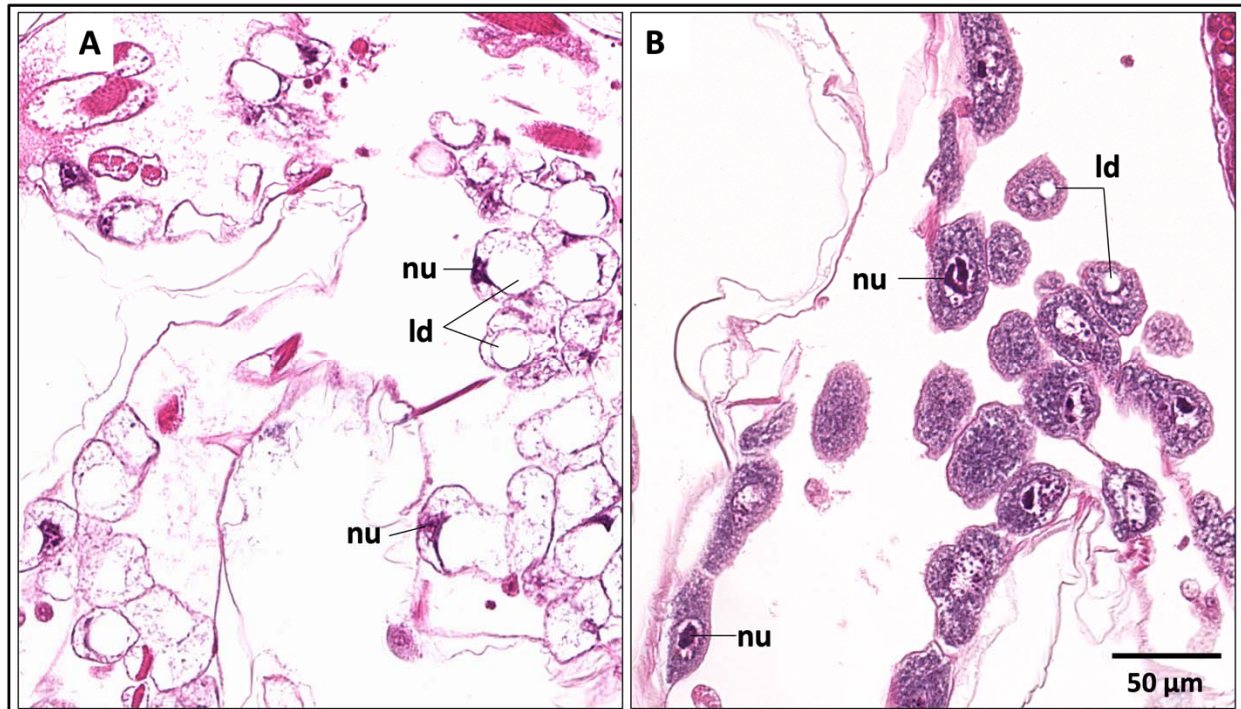

406  
407  
408  
409  
410  
411  
412  
413

**Figure 13. Comparison of male and female fat cells. (A)** Fat cells in the male consist of larger lipid droplets (ld), reduced and less granular cytoplasm with smaller nucleoli (nu) that are situated at the cell periphery. **(B)** Fat cells in the female have more granular cytoplasm with smaller lipid droplets (ld) and bigger nucleoli (nu). Corresponding atlas links:

(A) [http://daphnia.io/anatomy/histology/?t=sagittal\\_male&z=2&c=0.34,0.48,0.29,0.19](http://daphnia.io/anatomy/histology/?t=sagittal_male&z=2&c=0.34,0.48,0.29,0.19)

(B) [http://daphnia.io/anatomy/histology/?t=sagittal\\_female&z=7&c=0.38,0.75,0.21,0.14](http://daphnia.io/anatomy/histology/?t=sagittal_female&z=7&c=0.38,0.75,0.21,0.14)

## 414 **Conclusions and future direction**

415 Atlases are foundational to the systematic characterization of anatomical (i.e., cellular and tissue)  
416 structures of organisms in both healthy and diseased states. DaHRA is created in recognition of  
417 *Daphnia* as a model organism for biology, especially toxicology and ecotoxicology that now  
418 includes extensive environmental genomics and metabolomics (5,11,12) but currently lacks  
419 correlation with microanatomical (histopathological) phenotypes. DaHRA provides the  
420 histological component of anatomical context for both sexes of *D. magna*, using a web-based  
421 interface that is far more accessible to the average user than traditional paper-based atlases. With  
422 DaHRA as a foundation for whole-organism evaluation, we anticipate the addition of  
423 pathological effects to the atlas for making the histological data more actionable in terms of  
424 hazard and/or risk assessment and regulatory decision-making for environmental health  
425 protection. Histopathological changes detected within a whole organism can be correlated with  
426 toxicological -omics data that require spatial context to understand and allow a more  
427 comprehensive understanding of toxicological effects across cell types, organ systems, and  
428 organisms. This integration of data is critical for discovering and applying adverse outcome  
429 pathways (60) for next-generation risk assessment (61) where there is no predetermined link  
430 between biomarkers of adversity, causative agents, and organ-specific effects. This will help to  
431 draw cause-effect relationships between environmental toxicants, tissue-specific adverse effects  
432 in sentinel and test organisms, and human and animal diseases associated with environmental  
433 toxicants.

434  
435 DaHRA is envisioned to serve as a potential integrative platform for -omics data and to facilitate  
436 the addition of context from other imaging modalities. Molecular analyses including spatial  
437 transcriptomics (62), secondary ion mass spectrometry (63), and desorption electrospray  
438 ionization-mass spectrometry (64) typically rely on tissue histology to which the data can be  
439 mapped, and adding microanatomical context to molecular analyses has become a new priority.  
440 DaHRA can be used as a framework facilitating the addition of the -omics data. While 3D  
441 imaging modalities such as fluorescence-based confocal or laser sheet microscopy (65,66), or X-  
442 ray histotomography (67,68) provide the 3-dimensionality of anatomical structures that is lacking  
443 in histology, differential staining using a range of histochemical stains provides the basic  
444 understanding of tissue arrangement and cell identification that can be directly compared to the

445 grayscale characteristic of most 3D imaging modalities (69,70). Cross-referencing between 2D  
446 and 3D imaging modalities such as that illustrated in Figure 14 would enhance the utilization of  
447 both modalities. Notably, the understanding of structures from both 2D and 3D imaging  
448 modalities will require inspection of 2D images, which can benefit from our atlas labeling and  
449 visualization tools (Figure 14C). Using DaHRA as a reference for identifying tissue and cell  
450 types, 3D segmentation of anatomical structures is in progress and the creation of a *Daphnia* 3D  
451 atlas is underway.

452

453 Whole organism atlases are crucial for the elucidation of the anatomical and functional  
454 organization of tissues and organs. They are also essential as an integrative spatial framework for  
455 examining and identifying morphological and cellular change. The foundation for a whole-  
456 organism histology atlas is a representative set of high-resolution virtual slides (at least 40X  
457 magnification) encompassing a whole organism. The web-based platform allows the  
458 visualization and exploring of high-resolution virtual slides without requiring local file storage or  
459 downloading. Our platform also enables the interactive presentation of color-coded annotation of  
460 anatomical structures. The pipeline of DaHRA was designed with the intent to extend its features  
461 to the other model or sentinel organisms, which would be particularly exciting for creating cross-  
462 phylogenetic atlases.

463



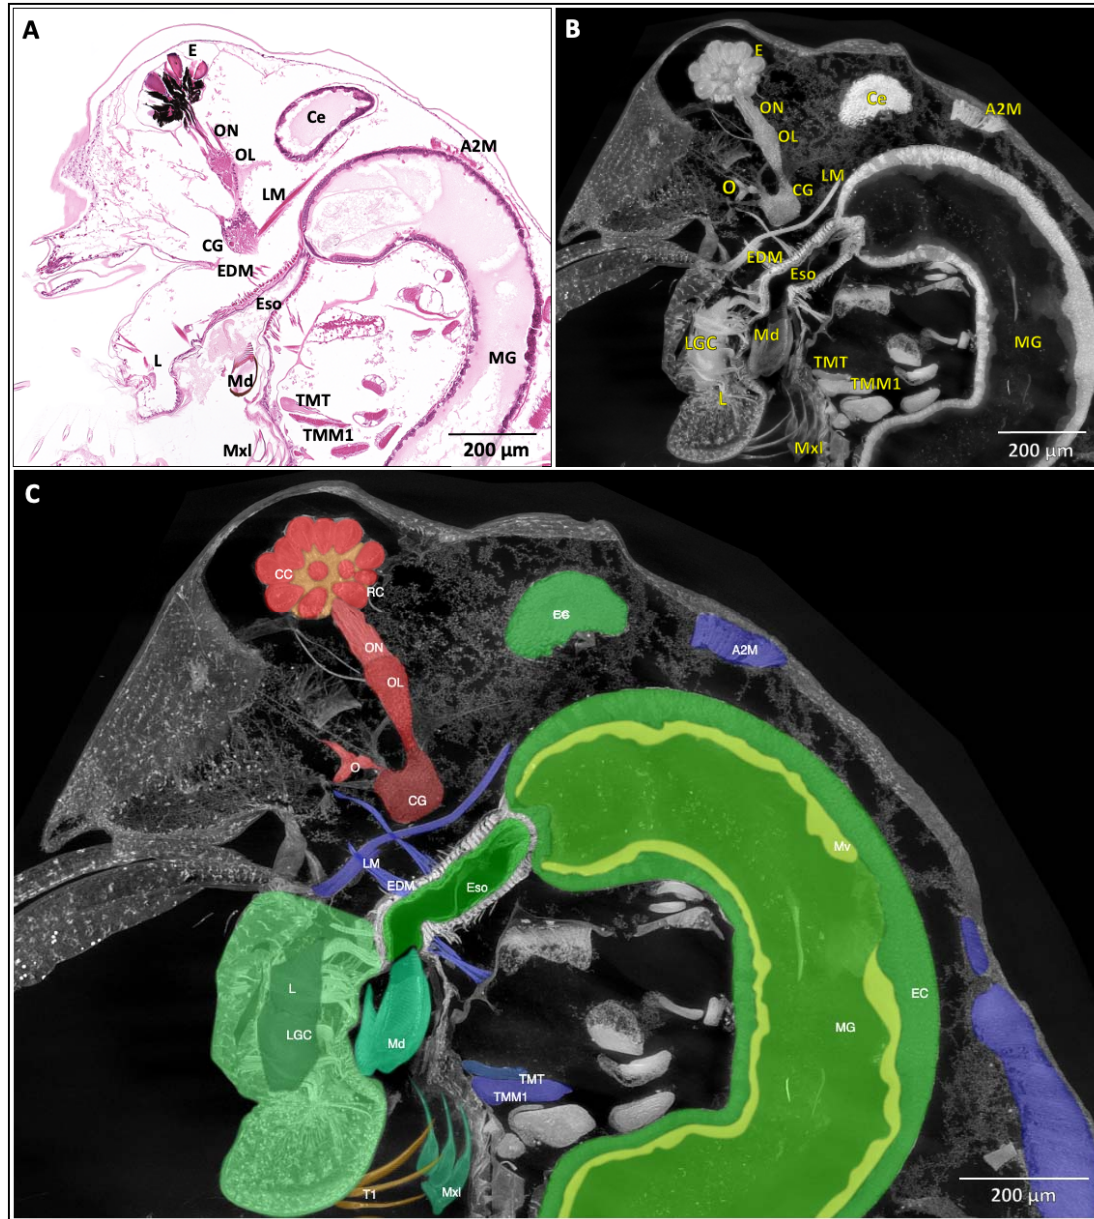

464

465 **Figure 14. Cross-referencing of histology with microCT-based X-ray histotomography.** (A)  
466 The anatomical structures of a female *D. magna* in a 5 µm histology section, cross-referenced to  
467 (B) a 25 µm stack from a histotomographic reconstruction of another female *D. magna* that  
468 provides more spatial context of various anatomical structures via easily adjustable stack  
469 thickness. Note that the connection of ocellus (O) to the cerebral ganglion (CG) and the 3-  
470 dimensionality of the compound eye (E) are demonstrated by the 25 µm histotomographic stack  
471 in panel B. (C) Color-overlay highlighting of the 25 µm stack shown in panel B, available in the  
472 atlas at <http://daphnia.io/anatomy/histotomography/?t=AAA392&z=1&c=0.18,0.02,0.79,0.55>.  
473 A2M, antennal muscle; Ce, hepatic cecum; CC, crystalline cone of ommatidium, EC, epithelial  
474 cell of midgut; EDM, esophageal dilator muscle; Eso, esophagus; L, labrum; LGC, labral gland  
475 cell; LM, levator muscle of labrum; Md, mandible; Mv, microvilli of midgut; Mxl, maxillule;  
476 MG, midgut; OL, optic lobe of cerebral ganglion; ON, optic nerve; TMM1, transverse  
477 mandibular muscle; TMT, transverse mandibular tendon.



## 478 **Material and methods**

### 479 ***Daphnia magna* husbandry**

480 *Daphnia magna* were purchased from Carolina Biological (NC, USA) and raised in "Aachener  
481 Daphnien-Medium" or ADaM (71) with modified content of selenium at room temperature  
482 (20°C ± 1°C) under a 16-hour light/8-hour dark photoperiod. *Daphnia magna* were fed three  
483 times weekly with 3.0 x 10<sup>7</sup> cells/ml of green microalgae (*Raphidocelis subcapitata*) and 0.1  
484 mg/mL of dissolved bakers' yeast. The animal density was maintained at about 20 neonates, 10  
485 juveniles and 5 to 7 reproducing adults per liter to prevent overcrowding and trigger the  
486 production of resting eggs and male *D. magna*. Under these conditions, animals reached maturity  
487 6 to 8 days post-birth and reproduced parthenogenetically every 3 days with an average of 15  
488 neonates per brood from the second brood onwards. Production of males and females carrying  
489 resting eggs was induced by overcrowding (>10 reproducing adults per liter) and shorter  
490 photoperiod (10 h).

491

### 492 **Fixation and decalcification**

493 *Daphnia magna* were euthanized in glass vials filled with bicarbonate water. Live *D. magna*  
494 were transferred using plastic transfer pipettes. Tips of transfer pipettes were trimmed at a 45°  
495 angle such that the diameter was double the size of the samples. Immediately following  
496 euthanasia, bicarbonate water was gently removed with a transfer pipette and replaced with at  
497 least 20X specimen volume of Bouin's solution (Newcomer Supply, WI) for fixation. The *D.*  
498 *magna* samples were immersed in fixative on a low-speed orbital shaker (Corning LSE) set to 55  
499 revolutions per minute (RPM). We tested several fixatives and fixation parameters, such as  
500 duration and temperature listed in Table 1. After fixation in Bouin's solution, samples were  
501 washed twice using 1X phosphate-buffered saline (PBS) for 10 min each time. This was  
502 followed by decalcification in 20X sample volume of cold 6% formic acid (Sigma-Aldrich, MO)  
503 for 24 hours. Samples were then rinsed in 70% ethanol for one minute and immersed in fresh  
504 70% ethanol for 30 min before agarose pre-embedding.

505

506

507

508

509 Table 1: Fixation parameters

| Fixative                      | Fixation time and temperature | Decalcification by cold 6% formic acid time and temperature |
|-------------------------------|-------------------------------|-------------------------------------------------------------|
| Bouin's solution              | 48 h, 4 °C                    | 24 h, 21 °C                                                 |
|                               | 48 h, 21 °C                   | 24 h, 21 °C                                                 |
| 4% Paraformaldehyde           | 48 h, 4 °C                    | 24 h, 4 °C                                                  |
|                               | 48 h, 21 °C                   | 24 h, 4 °C                                                  |
| 10% Neutral buffered formalin | 48 h, 4 °C                    | 24 h, 4 °C                                                  |
|                               | 48 h, 21 °C                   | 24 h, 4 °C                                                  |

510

## 511 **Mold and agarose embedding**

512 Samples were pre-embedded in 1% agarose block casted using “triangle mold” (Figure 1A-B)  
513 for histological processing following a protocol adapted from Sabaliauskas et al. (2006). After  
514 taping around the triangle mold, 2.5 mL of 1% agarose (Sigma-Aldrich, MO) at 55 °C were  
515 pipetted onto the mold, and then let solidify at room temperature (Figure 1C). Once solidified,  
516 the agarose block was removed gently from the mold (Figure 1D). Then, *D. magna* samples were  
517 transferred onto the agarose block using a plastic pipette. A thin layer of 70% ethanol was  
518 pipetted onto the block to help with the positioning of samples. Samples designated for the  
519 sagittal plane were laid on their sides with a swimming antenna in the wells and all rostra facing  
520 the same direction. Samples designated for coronal and transverse orientation were laid on their  
521 back in the wells (Figure 1 E-F). Once all the samples were positioned in individual wells, excess  
522 ethanol was carefully dried off using lint-free Kimwipes without agitating the samples. Each  
523 sample was first topped-off with one drop of molten 1% agarose (about 50 °C) without moving  
524 the sample, followed by a thin layer of 1% agarose covering all the samples. After the agarose  
525 solidified (~ 5 minutes at room temperature), the block was trimmed, placed into a tissue  
526 cassette, and stored in 70% ethanol for tissue processing. During paraffin embedding, the agarose  
527 blocks were positioned in the appropriate final orientation (transverse, sagittal or coronal) for  
528 sectioning.

529

## 530 **Processing, sectioning, and staining**

531 All samples were dehydrated and infiltrated in RMC Model 1530 automated closed reagent type  
532 tissue processor (Table 2). The *D. magna* samples were serially sectioned at 5  $\mu$ m on a Leica  
533 RM2255 automated rotary microtome. Sections were then stained with Harris' hematoxylin and  
534 eosin (H&E) in an auto-stainer (Sakura Tissue Tek DRS 2000, IMEB, CA) following protocol  
535 adapted from Copper et al. (2018). The duration of hematoxylin staining was extended from 3 to  
536 7 min to achieve better contrast for samples fixed with Bouin's solution (Table 3).

537

538 Table 2: Tissue Processing Steps

| Duration                     | Solution     | Temp (°C) | Vacuum (in. Hg) |
|------------------------------|--------------|-----------|-----------------|
| 45 min                       | 80% Ethanol  | 25        | 15              |
| 45 min                       | 95% Ethanol  | 25        | 15              |
| 1 hour                       | 95% Ethanol  | 25        | 15              |
| 1 hour (repeat thrice)       | 100% Ethanol | 25        | 15              |
| 1 hour (repeat twice)        | Xylene       | 25        | 15              |
| 1 hour 30 min (repeat twice) | Paraffin     | 60        | 15              |
| 2 hours                      | Paraffin     | 60        | 15              |

539

540 Table 3: Automated staining steps

| Time                 | Solution          |
|----------------------|-------------------|
| 3 min                | Xylene            |
| 5 min                | Xylene            |
| 2 min (repeat twice) | 100% Ethanol      |
| 2 min                | 95% Ethanol       |
| 10 min               | Tap water         |
| 7 min                | Hematoxylin       |
| 1 min                | Tap water         |
| 1 min                | Acidified Alcohol |
| 1 min                | Tap water         |
| 0.2 min              | Ammoniated water  |
| 1 min                | Tap water         |
| 0.3 min              | Eosin             |
| 1 min                | 30% Ethanol       |
| 1 min                | 95% Ethanol       |
| 1 min                | 100% Ethanol      |
| 1 min                | Xylene            |

541

## 542 Histology slide digitization

543 All slides were scanned using an Aperio AT2 slide scanner (LeicaBiosystems, IL) and saved in  
544 TIFF format as digital slides. The regions of selected *D. magna* samples were then extracted  
545 using Image Scope. Three channels (Red, Green, Blue) of these digital slides were stacked using  
546 Fiji, oriented, and post-processed for background removal using Adobe Photoshop. Each set of  
547 digital slides was then pyramidally tiled (libvips) in preparation for the web-based viewer.

548

## 549 **Labeling and segmentation workflow**

550 For each anatomical structure included in the anatomical ontology (a list of terms organized by  
551 groups and subgroups, S3 File), we began by reviewing published literature, then concluding  
552 with a visual analysis of the structure in each of the three orthogonally cut histology slide sets.  
553 Anatomical structures included in the anatomical ontology were grouped and color-coded based  
554 on organ systems. Labeling and segmentation of anatomical structures were done one image at a  
555 time in Adobe Illustrator. The Adobe Illustrator Layer of an anatomical structure was first  
556 labeled corresponding to the appropriate ontological term. Each anatomical structure was  
557 segmented by outlining the structure with the curvature tool. Segmentation was then assigned the  
558 color based on the pre-determined color code. After completion of the labeling and segmentation  
559 of all anatomical structures on a given image, a single scalable vector graphic (SVG) was  
560 exported to be used as input for the web-based viewer.

561

## 562 **Web-interface workflow**

563 The file sizes associated with digital slides are on the order of >2 GB per slide, making scans  
564 challenging to view for users with standard computational resources. For easier access and usage  
565 of the data without the need to download full-resolution images, we developed an open-access,  
566 web-based digital slide viewing platform based on the open-access project OpenSeadragon  
567 (<https://openseadragon.github.io/>). This viewer combines annotations and digital scans into a  
568 seamless experience to provide user-friendly access to high-resolution data. The atlas' code was  
569 written in client-side JavaScript, HTML, and CSS requires no traditional download and has no  
570 server requirement to run the basic implementation. Pyramidally tiled images are parsed and  
571 visualized with OpenSeadragon. When the user loads a new image, the viewer opens the  
572 corresponding SVG file. The SVG file contains all the anatomical labels on a given image and

573 their corresponding shape vector information. The viewer parses all labels from the <g> element  
574 of the SVG file, plotting the corresponding regions on the viewer itself, and updates the ontology  
575 to note what regions are available to visualize on the current image.

## 576 **Acknowledgments**

577 The authors thank Patrick Leibich and the Department of Surgery, Penn State College of  
578 Medicine for 3D-SLA printing the casting molds, and Chadwick Harris and Debra Shearer for  
579 helping with histology sectioning and slide staining. The authors are grateful to Dr. Dula  
580 Parkison and Advanced Light Sources Beamline 8.3.2, Lawrence Berkeley National Labs for  
581 imaging the *Daphnia* samples. This work was supported by the National Institutes of Health  
582 (grant 1R24OD18559 to KCC), the Jake Gittlen Laboratories for Cancer Research, the Penn  
583 State Human Health and Environment Seed Grant supported by Pennsylvania Department of  
584 Health Commonwealth Universal Research Enhancement Program Grant. The Department of  
585 Health specifically disclaims responsibility for any analyses, interpretations, or conclusions. This  
586 work contributes to the PrecisionTox project that has received funding from the European  
587 Union’s Horizon 2020 research and innovation program under grant agreement No 965406.

588

## 589 **Competing Interests**

590 The authors declare no competing interest.

591

## 592 **References**

- 593 1. Au DWT. The application of histo-cytopathological biomarkers in marine pollution  
594 monitoring: a review. *Mar Pollut Bull.* 2004 May 1;48(9):817–34.
- 595 2. Lampert W. *Daphnia: Development of a Model Organism in Ecology and Evolution*  
596 [Internet]. Book 21. Oldendorf/Luhe: International Ecology Institute; 2011 [cited 2022 Jan  
597 21]. (Excellence in Ecology). Available from:  
598 [https://www.semanticscholar.org/paper/Daphnia%3A-Development-of-a-Model-Organism-  
599 in-Ecology-Lampert/a373b75c3524f757e536ebaf49e5de393ca720d0](https://www.semanticscholar.org/paper/Daphnia%3A-Development-of-a-Model-Organism-in-Ecology-Lampert/a373b75c3524f757e536ebaf49e5de393ca720d0)
- 600 3. Stollewerk A. The water flea *Daphnia* - a “new” model system for ecology and evolution? *J*  
601 *Biol.* 2010 Jan 13;9(2):21.
- 602 4. Kikuchi M, Sasaki Y, Wakabayashi M. Screening of organophosphate insecticide pollution  
603 in water by using *Daphnia magna*. *Ecotoxicol Environ Saf.* 2000 Nov 1;47(3):239–45.

- 604 5. Tkaczyk A, Bownik A, Dudka J, Kowal K, Ślaska B. *Daphnia magna* model in the toxicity  
605 assessment of pharmaceuticals: A review. *Sci Total Environ*. 2021 Apr 1;763:143038.
- 606 6. Kühn R, Pattard M, Pernak K-D, Winter A. Results of the harmful effects of water pollutants  
607 to *Daphnia magna* in the 21 day reproduction test. *Water Res*. 1989 Apr 1;23(4):501–10.
- 608 7. Environmental Protection Agency. Ecological Effects Test Guidelines OCSPP850.1300:  
609 Daphnid chronic toxicity test. 1996.
- 610 8. Environmental Protection Agency. Methods for Measuring the Acute Toxicity of Effluents  
611 and Receiving Waters to Freshwater and Marine Organisms. 2002.
- 612 9. OECD. Test No. 202: *Daphnia* sp. Acute Immobilisation Test [Internet]. Paris: Organisation  
613 for Economic Co-operation and Development; 2004 [cited 2021 Nov 4]. Available from:  
614 [https://www.oecd-ilibrary.org/environment/test-no-202-daphnia-sp-acute-immobilisation-](https://www.oecd-ilibrary.org/environment/test-no-202-daphnia-sp-acute-immobilisation-test_9789264069947-en)  
615 [test\\_9789264069947-en](https://www.oecd-ilibrary.org/environment/test-no-202-daphnia-sp-acute-immobilisation-test_9789264069947-en)
- 616 10. OECD. *Daphnia magna* Reproduction Test (OECD TG 211) [Internet]. Paris: OECD; 2018  
617 Sep [cited 2021 Nov 4] p. 253–63. Available from: [https://www.oecd-](https://www.oecd-ilibrary.org/environment/revised-guidance-document-150-on-standardised-test-guidelines-for-evaluating-chemicals-for-endocrine-disruption/daphnia-magna-reproduction-test-oecd-tg-211_9789264304741-12-en)  
618 [ilibrary.org/environment/revised-guidance-document-150-on-standardised-test-guidelines-](https://www.oecd-ilibrary.org/environment/revised-guidance-document-150-on-standardised-test-guidelines-for-evaluating-chemicals-for-endocrine-disruption/daphnia-magna-reproduction-test-oecd-tg-211_9789264304741-12-en)  
619 [for-evaluating-chemicals-for-endocrine-disruption/daphnia-magna-reproduction-test-oecd-](https://www.oecd-ilibrary.org/environment/revised-guidance-document-150-on-standardised-test-guidelines-for-evaluating-chemicals-for-endocrine-disruption/daphnia-magna-reproduction-test-oecd-tg-211_9789264304741-12-en)  
620 [tg-211\\_9789264304741-12-en](https://www.oecd-ilibrary.org/environment/revised-guidance-document-150-on-standardised-test-guidelines-for-evaluating-chemicals-for-endocrine-disruption/daphnia-magna-reproduction-test-oecd-tg-211_9789264304741-12-en)
- 621 11. Kim HJ, Koedrith P, Seo YR. Ecotoxicogenomic approaches for understanding molecular  
622 mechanisms of environmental chemical toxicity using aquatic invertebrate, *Daphnia* model  
623 organism. *Int J Mol Sci*. 2015 May 29;16(6):12261–87.
- 624 12. Shaw JR, Pfreder ME, Eads BD, Klaper R, Callaghan A, Sibly RM, et al. *Daphnia* as an  
625 emerging model for toxicological genomics. In: Hogstrand C, Kille P, editors. *Advances in*  
626 *Experimental Biology* [Internet]. Elsevier; 2008 [cited 2021 Oct 8]. p. 165–328.  
627 (Comparative Toxicogenomics; vol. 2). Available from:  
628 <https://www.sciencedirect.com/science/article/pii/S1872242308000057>
- 629 13. Bernet D, Schmidt H, Meier W, Burkhardt Holm P, Wahli T. Histopathology in fish:  
630 proposal for a protocol to assess aquatic pollution. *J Fish Dis*. 1999;22(1):25–34.
- 631 14. Ramírez-Duarte W, Rondon Barragan I, Eslava-Mocha P. Acute toxicity and  
632 histopathological alterations of Roundup® herbicide on “cachama blanca” (*Piaractus*  
633 *brachyomus*). *Pesqui Veterinária Bras*. 2008 Nov 1;28:547.
- 634 15. Wester PW, Vos JG. Toxicological pathology in laboratory fish: an evaluation with two  
635 species and various environmental contaminants. *Ecotoxicol Lond Engl*. 1994 Mar;3(1):21–  
636 44.
- 637 16. Chakraborty S, Ray M, Ray S. Toxicity of sodium arsenite in the gill of an economically  
638 important mollusc of India. *Fish Shellfish Immunol*. 2010 Jul;29(1):136–48.

- 639 17. LaDouceur EEB, Wynne J, Garner MM, Nyaoke A, Keel MK. Lesions of Copper Toxicosis  
640 in Captive Marine Invertebrates With Comparisons to Normal Histology. *Vet Pathol.* 2016  
641 May;53(3):648–58.
- 642 18. Kumar V, Abbas AK, Aster JC. *Robbins & Cotran Pathologic Basis Of Disease (robbins*  
643 *Pathology)* [Internet]. Tenth Edition. Elsevier; 2020 [cited 2022 Mar 28]. 1392 p. Available  
644 from: <https://basi6direct.com/products/9780323531139>
- 645 19. Treuting PM, Dintzis S, Montine KS, editors. *Comparative Anatomy and Histology: A*  
646 *Mouse, Rat, and Human Atlas.* 2nd edition. London San Diego Cambridge, MA Kidlington:  
647 Academic Press; 2017. 570 p.
- 648 20. Hebert PDN, Ward RD. Inheritance during parthenogenesis in *Daphnia magna*. *Genetics.*  
649 1972 Aug;71(4):639–42.
- 650 21. Kvist J, Athanàsio CG, Pfrender ME, Brown JB, Colbourne JK, Mirbahai L. A  
651 comprehensive epigenomic analysis of phenotypically distinguishable, genetically identical  
652 female and male *Daphnia pulex*. *BMC Genomics.* 2020 Dec;21(1):17.
- 653 22. Copper JE, Budgeon LR, Foutz CA, van Rossum DB, Vanselow DJ, Hubley MJ, et al.  
654 Comparative analysis of fixation and embedding techniques for optimized histological  
655 preparation of zebrafish. *Comp Biochem Physiol Toxicol Pharmacol CBP.* 2018  
656 Jun;208:38–46.
- 657 23. Agar WE. The swimming setae of *Daphnia carinata*. *J Cell Sci.* 1950 Dec 1;s3-91(16):353–  
658 68.
- 659 24. Auld SKJR, Scholefield JA, Little TJ. Genetic variation in the cellular response of *Daphnia*  
660 *magna* (Crustacea: Cladocera) to its bacterial parasite. *Proc R Soc B Biol Sci.* 2010 Nov  
661 7;277(1698):3291–7.
- 662 25. Bednarska A. Adaptive changes in morphology of *Daphnia* filter appendages in response to  
663 food stress. *Polish Journal of Ecology.* 2006;54:663–8.
- 664 26. Benzie JAH. *The Genus Daphnia (including Daphniopsis) (Anomopoda:Daphniidae).*  
665 Kenobi Productions; 2005. 388 p.
- 666 27. Binder G. Das Muskelsystem von *Daphnia*. *Int Rev Gesamten Hydrobiol Hydrogr.*  
667 1931;26(1–2):54–98.
- 668 28. Christensen AK, Owusu NG, Jean-Louis D. Carapace epithelia are rich in large filamentous  
669 actin bundles in *Daphnia magna*, *Daphnia pulex*, and *Sida crystallina* (Crustacea:  
670 Cladocera). *Invertebr Biol.* 2018;137(1):49–59.
- 671 29. Consi TR, Macagno ER, Necles N. The oculomotor system of *Daphnia magna*. The eye  
672 muscles and their motor neurons. *Cell Tissue Res.* 1987 Mar;247(3):515–23.



- 673 30. Ebert D. Introduction to Daphnia Biology [Internet]. Ecology, Epidemiology, and Evolution  
674 of Parasitism in Daphnia [Internet]. National Center for Biotechnology Information (US);  
675 2005 [cited 2022 Mar 31]. Available from: <https://www.ncbi.nlm.nih.gov/books/NBK2042/>
- 676 31. Edwards C. The anatomy of Daphnia mandibles. *Trans Am Microsc Soc.* 1980;99(1):2–24.
- 677 32. Goldmann T, Becher B, Wiedorn KH, Pirow R, Deutschbein ME, Vollmer E, et al. Epipodite  
678 and fat cells as sites of hemoglobin synthesis in the branchiopod crustacean Daphnia  
679 magna. *Histochem Cell Biol.* 1999 Nov;112(5):335–9.
- 680 33. Halcrow K. The fine structure of the carapace integument of Daphnia magna Straus  
681 (Crustacea Branchiopoda). *Cell Tissue Res.* 1976 Jun 14;169(2):267–76.
- 682 34. Hiruta C, Tochinali S. Formation and structure of the ephippium (resting egg case) in relation  
683 to molting and egg laying in the water flea Daphnia pulex De Geer (Cladocera:  
684 Daphniidae). *J Morphol.* 2014 Jul;275(7):760–7.
- 685 35. Kikuchi S. The fine structure of the gill epithelium of a fresh-water flea, Daphnia magna  
686 (Crustacea: Phyllopoda) and changes associated with acclimation to various salinities. I.  
687 Normal fine structure. *Cell Tissue Res.* 1983;229(2):253–68.
- 688 36. Kress T, Harzsch S, Dircksen H. Neuroanatomy of the optic ganglia and central brain of the  
689 water flea Daphnia magna (Crustacea, Cladocera). *Cell Tissue Res.* 2016 Mar  
690 1;363(3):649–77.
- 691 37. McCool MD, Baer KN, Christie AE. Histaminergic signaling in the central nervous system  
692 of Daphnia and a role for it in the control of phototactic behavior. *J Exp Biol.* 2011 May  
693 15;214(Pt 10):1773–82.
- 694 38. Metschnikoff E. A disease of Daphnia caused by a yeast. A contribution to the theory of  
695 phagocytes as agents for attack on disease-causing organisms. *Archiv Pathol Anat Physiol*  
696 *Klin Med.* 1884;96:177–95.
- 697 39. Rossi F. Comparative observations on the female reproductive system and parthenogenetic  
698 oogenesis in Cladocera. *Bolletino Zool.* 1980 Jan;47(1–2):21–38.
- 699 40. Schultz TW, Kennedy JR. The fine structure of the digestive system of Daphnia pulex  
700 (Crustacea: Cladocera). *Tissue Cell.* 1976 Jan 1;8(3):479–90.
- 701 41. Smirnov NN. *Physiology of the Cladocera: Second Edition. Physiology of the Cladocera:*  
702 *Second Edition.* 2017. 1 p.
- 703 42. Stein RJ, Richter WR, Zussman RA, Brynjolfsson G. ULTRASTRUCTURAL  
704 CHARACTERIZATION OF DAPHNIA HEART MUSCLE. *J Cell Biol.* 1966 Apr  
705 1;29(1):168–70.
- 706 43. Steinsland AJ. Heart ultrastructure in Daphnia pulex De Geer (Crustacea, Branchiopoda,  
707 Cladocera). *J Crustac Biol.* 1982;2(1):54–8.

- 708 44. Quaglia A, Sabelli B, Villani L. Studies on the intestine of Daphnidae (Crustacea, Cladocera)  
709 ultrastructure of the midgut of *Daphnia magna* and *Daphnia obtusa*. *J Morphol.*  
710 1976;150(3):711–25.
- 711 45. Weiss LC, Tollrian R, Herbert Z, Laforsch C. Morphology of the *Daphnia* nervous system: a  
712 comparative study on *Daphnia pulex*, *Daphnia lumholtzi*, and *Daphnia longicephala*. *J*  
713 *Morphol.* 2012 Dec;273(12):1392–405.
- 714 46. Wuerz M, Huebner E, Huebner J. The morphology of the male reproductive system,  
715 spermatogenesis and the spermatozoon of *Daphnia magna* (Crustacea: Branchiopoda). *J*  
716 *Morphol.* 2017 Nov;278(11):1536–50.
- 717 47. Zaffagnini F, Zeni C. Considerations on some cytological and ultrastructural observations on  
718 fat cells of *Daphnia* (Crustacea, Cladocera). *Bollettino di zoologia.* 1986;53(1):33–9.
- 719 48. Zaffagnini F, Zeni C. Ultrastructural investigations on the labral glands of *Daphnia obtusa*  
720 (Crustacea, Cladocera). *J Morphol.* 1987 Jul;193(1):23–33.
- 721 49. Zeni C, Franchini A. A preliminary histochemical study on the labral glands of *Daphnia*  
722 *obtusa* (Crustacea, Cladocera). *Acta Histochem.* 1990;88:175–81.
- 723 50. Smirnov NN. Physiology of the Cladocera. *Physiol Cladocera.* 2013 Oct 1;1–336.
- 724 51. Fryer G. Functional morphology and the adaptive radiation of the Daphniidae  
725 (Branchiopoda: Anomopoda). *Philos Trans R Soc Lond B Biol Sci.* 1991 Jan  
726 29;331(1259):1–99.
- 727 52. Decaestecker E, De Meester L, Mergeay J. Cyclical parthenogenesis in *Daphnia*: sexual  
728 versus asexual reproduction. In: Schön I, Martens K, Dijk P, editors. *Lost Sex: The*  
729 *Evolutionary Biology of Parthenogenesis* [Internet]. Dordrecht: Springer Netherlands; 2009  
730 [cited 2022 Jan 21]. p. 295–316. Available from: [https://doi.org/10.1007/978-90-481-2770-](https://doi.org/10.1007/978-90-481-2770-2_15)  
731 [2\\_15](https://doi.org/10.1007/978-90-481-2770-2_15)
- 732 53. Chen L, Barnett RE, Horstmann M, Bamberger V, Heberle L, Krebs N, et al. Mitotic activity  
733 patterns and cytoskeletal changes throughout the progression of diapause developmental  
734 program in *Daphnia*. *BMC Cell Biol.* 2018 Dec 29;19:30.
- 735 54. Cáceres CE. Interspecific variation in the abundance, production, and emergence of *Daphnia*  
736 diapausing eggs. *Ecology.* 1998;79(5):1699–710.
- 737 55. Mergeay J, Verschuren D, Kerckhoven LV, Meester LD. Two hundred years of a diverse  
738 *Daphnia* community in Lake Naivasha (Kenya): effects of natural and human-induced  
739 environmental changes. *Freshw Biol.* 2004;49(8):998–1013.
- 740 56. Beaton MJ, Hebert PDN. Miniature genomes and endopolyploidy in cladoceran crustaceans.  
741 *Genome.* 1989 Dec 1;32(6):1048–53.

- 742 57. Kato Y, Kobayashi K, Watanabe H, Iguchi T. Environmental Sex Determination in the  
743 Branchiopod Crustacean *Daphnia magna*: Deep Conservation of a Doublesex Gene in the  
744 Sex-Determining Pathway. *PLoS Genet* [Internet]. 2011 Mar 24 [cited 2021 Mar 23];7(3).  
745 Available from: <https://www.ncbi.nlm.nih.gov/pmc/articles/PMC3063754/>
- 746 58. Nong QD, Mohamad Ishak NS, Matsuura T, Kato Y, Watanabe H. Mapping the expression  
747 of the sex determining factor *Doublesex1* in *Daphnia magna* using a knock-in reporter. *Sci*  
748 *Rep*. 2017 Nov 2;7(1):13521.
- 749 59. Wuerz M, Whyard S, Loadman NL, Wiegand MD, Huebner JD. Sex determination and gene  
750 expression in *Daphnia magna* exposed to juvenile hormone. *J Plankton Res*. 2019 Jul  
751 26;41(4):393–406.
- 752 60. OECD. Adverse Outcome Pathways, Molecular Screening and Toxicogenomics - OECD  
753 [Internet]. 2022 [cited 2022 Feb 22]. Available from:  
754 [https://www.oecd.org/chemicalsafety/testing/adverse-outcome-pathways-molecular-](https://www.oecd.org/chemicalsafety/testing/adverse-outcome-pathways-molecular-screening-and-toxicogenomics.htm)  
755 [screening-and-toxicogenomics.htm](https://www.oecd.org/chemicalsafety/testing/adverse-outcome-pathways-molecular-screening-and-toxicogenomics.htm)
- 756 61. US EPA. Next Generation Risk Assessment: incorporation of recent advances in molecular,  
757 computational, and systems biology (final report) [Internet]. 2014 [cited 2022 Feb 22].  
758 Available from: <https://cfpub.epa.gov/ncea/risk/recordisplay.cfm?deid=286690>
- 759 62. Marx V. Method of the Year: spatially resolved transcriptomics. *Nat Methods*. 2021  
760 Jan;18(1):9–14.
- 761 63. Bonnin EA, Rizzoli SO. Novel secondary ion mass spectrometry methods for the  
762 examination of metabolic effects at the cellular and subcellular levels. *Front Behav*  
763 *Neurosci*. 2020;14:124.
- 764 64. Smith MJ, Weber RJM, Viant MR. Spatially mapping the baseline and Bisphenol-A exposed  
765 *Daphnia magna* lipidome using desorption electrospray ionization-mass spectrometry.  
766 *Metabolites*. 2022 Jan;12(1):33.
- 767 65. Connelly SJ, Walling K, Wilbert SA, Catlin DM, Monaghan CE, Hlynchuk S, et al. UV-  
768 Stressed *Daphnia pulex* increase fitness through uptake of Vitamin D3. *PLOS ONE*. 2015  
769 Jul 6;10(7):e0131847.
- 770 66. Mittmann B, Ungerer P, Klann M, Stollewerk A, Wolff C. Development and staging of the  
771 water flea *Daphnia magna* (Straus, 1820; Cladocera, Daphniidae) based on morphological  
772 landmarks. *EvoDevo*. 2014 Mar 18;5(1):12.
- 773 67. Ding Y, Vanselow DJ, Yakovlev MA, Katz SR, Lin AY, Clark DP, et al. Computational 3D  
774 histological phenotyping of whole zebrafish by X-ray histotomography. White RM, Stainier  
775 DY, Ekker SC, editors. *eLife*. 2019 May 7;8:e44898.
- 776 68. Yakovlev MA, Vanselow DJ, Ngu MS, Zaino CR, Katz SR, Ding Y, et al. A wide-field  
777 micro-computed tomography detector: micron resolution at half-centimetre scale. *J*

- 778           Synchrotron Radiat [Internet]. 2022 Mar 1 [cited 2022 Feb 22];29(2). Available from:  
779           <https://journals.iucr.org/s/issues/2022/02/00/mo5248/>
- 780   69. Castejón D, Alba-Tercedor J, Rotllant G, Ribes E, Durfort M, Guerao G. Micro-computed  
781           tomography and histology to explore internal morphology in decapod larvae. *Sci Rep*. 2018  
782           Sep 26;8(1):14399.
- 783   70. Schulz G, Waschkes C, Pfeiffer F, Zanette I, Weitkamp T, David C, et al. Multimodal  
784           imaging of human cerebellum - merging X-ray phase microtomography, magnetic  
785           resonance microscopy and histology. *Sci Rep*. 2012 Nov 9;2(1):826.
- 786   71. Klüttgen B, Dülmer U, Engels M, Ratte HT. ADaM, an artificial freshwater for the culture of  
787           zooplankton. *Water Res*. 1994 Mar 1;28(3):743–6.
- 788   72. Sabaliauskas NA, Foutz CA, Mest JR, Budgeon LR, Sidor AT, Gershenson JA, et al. High-  
789           throughput zebrafish histology. *Methods*. 2006 Jul 1;39(3):246–54.
- 790   73. OpenSeadragon [Internet]. [cited 2021 Dec 15]. Available from:  
791           <https://openseadragon.github.io/>
- 792   74. Haney JF, Hall DJ. Sugar-coated Daphnia: A preservation technique for Cladocera<sup>1</sup>. *Limnol*  
793           *Oceanogr*. 1973;18(2):331–3.
- 794
