## **A web-based histology atlas for the freshwater Cladocera species *Daphnia magna***

**Short title: Web-based *Daphnia* histology atlas**

Mee S. Ngu<sup>1,2</sup>, Daniel J. Vanselow<sup>1,2</sup>, Carolyn R. Zaino<sup>1,2</sup>, Alex Y. Lin<sup>1,2</sup>, Jean E. Copper<sup>1,2</sup>, Margaret J. Beaton<sup>3</sup>, Luisa Orsini<sup>4</sup>, John K. Colbourne<sup>4</sup>, Keith C. Cheng<sup>1,2,\*</sup>, Khai C. Ang<sup>1,2,\*</sup>

<sup>1</sup>Department of Pathology, Pennsylvania State University College of Medicine, Pennsylvania, USA

<sup>2</sup>Jake Gittlen Laboratories for Cancer Research, Pennsylvania State University College of Medicine, Pennsylvania, USA

<sup>3</sup>Department of Biology, Mount Allison University, Sackville, Canada

<sup>4</sup>Centre for Environmental Research and Justice, The University of Birmingham, Birmingham, UK

\*Equal, contributing corresponding authors:

Khai C. Ang ([kca2@psu.edu](mailto:kca2@psu.edu))

Keith C. Cheng ([kcheng76@gmail.com](mailto:kcheng76@gmail.com))

## 1 **Abstract**

2 *Daphnia* are keystone species of freshwater habitats used as model organisms in ecology and  
3 evolution. They are also routinely used as environmental sentinels in regulatory toxicology and  
4 are increasingly contributing to new approach methodologies (NAM) for chemical risk  
5 assessments. Yet, it is challenging to establish causal links between biomolecular (omics)  
6 responses to chemical exposure and their toxicity phenotypes without a baseline knowledge of  
7 tissue- and cell-morphology of healthy individuals. Here, we introduce the *Daphnia* Histology  
8 Reference Atlas (DaHRA, <http://daphnia.io/anatomy/>), which provides a baseline of wildtype  
9 anatomical and microanatomical structures of female and male *Daphnia magna*. This interactive  
10 web-based resource features overlaid vectorized demarcation of anatomical structures that  
11 compliant with an anatomical ontology created for this atlas. Since sex is environmentally  
12 induced in *Daphnia*, DaHRA is a map of sexual dimorphism by phenotypic plasticity. We also  
13 benchmark this tool for mechanistic toxicology by exposing *Daphnia* to acetaminophen and use  
14 the atlas to document its effects in organs, tissues, and cell-types. DaHRA represents an essential  
15 step towards correlating phenotypes with the discovery power of hypothesis-free, molecular  
16 backdrop against which pathology can be interpreted, thereby offering a platform to elucidate  
17 how genetic variation and external perturbations cascade through multiple biological scales to  
18 influence phenotype.

19

20 **Keywords:** *Daphnia magna*, histology, microanatomy atlas, phenotypes, sexual dimorphism,  
21 histopathology

22

23 **Synopsis:** Whole-organism *Daphnia* atlas as foundation for unbiased phenotyping, and its utility  
24 in characterizing sexual dimorphism and effects of chemical toxicity.

25

## 26 **1. Introduction**

27

28 Despite regulatory restrictions on hazardous chemicals, chemical pollution is the leading cause  
29 of premature deaths and morbidities globally (1–3). Adding to this, habitat loss, climate change,  
30 and pollution are also leading environmental factors impacting biodiversity, with more than 60%  
31 of ecosystems services being reduced or wiped out in the last two decades (4). The introduction

32 of new approach methodologies (NAMs) for assessing chemicals for their toxicity is designed to  
33 improve regulatory outcomes by replacing outdated, data-poor methods that rely on observing  
34 apical endpoints (such as death or reproductive failure in selected animals) with modern methods  
35 at revealing the pathways to toxicity (5) These methods include data-rich techniques such as  
36 transcriptomics and metabolomics (omics) that measure changes in the abundance of all gene  
37 transcripts and endogenous metabolites upon exposure that are indicative of the chemical modes  
38 of action (6–8). Although these data are robust at measuring biomolecular activity linked to a  
39 huge array of potential adverse health effects, these data must be anchored to their phenotypic  
40 effects for regulatory relevance (9). Yet despite omics producing high content mechanistic  
41 information that enables data-driven discoveries, there are few analogs to discover causal links to  
42 phenotypes. A primary objective of this paper is to provide a necessary resource for obtaining  
43 and interpreting high content phenotypic data for the model species *D. magna*, which is used  
44 globally to set regulatory limits on potentially hazardous chemical substances in the environment  
45 and one of five models used uncover the evolutionary origins of toxicity (10).

46  
47 The water flea *Daphnia* is a keystone branchiopod crustacean (order Cladocera) in freshwater  
48 lotic ecosystems worldwide and is an established model in ecology, evolution, and ecotoxicology  
49 (11–13). They are responsive to environmental change and they adapt via evolutionary  
50 mechanisms and plasticity (14–16). This plasticity includes the sex of daphniids, which is  
51 determined by environmental conditions. Relevant to ecotoxicity testing is their short generation  
52 time that enables the experimental manipulation of large populations; and a parthenogenetic life  
53 cycle that allows the rearing of populations of identical clones from single genotypes (17). The  
54 latter property has the unique advantage of allowing the concurrent study of molecular and  
55 phenotypic responses to multiple environmental insults, including chemical pollutants. *Daphnia*  
56 *magna* is the species of choice in ecotoxicogenomics (18,19). Recently, its hologenome (20),  
57 reference genome (21,22) and transcriptome (23–25) have been published, elevating this species  
58 to the ranks of other biomedical model species for ecological genomics. Yet, the full potential of  
59 this species cannot be entirely realized without the correlation between molecular, and tissue-  
60 and cell- specific phenotypic responses.

61

62 Histopathology, the histological study of tissue-specific changes, enables the identification of  
63 targets of toxicity and diseases, bridging phenotypes and biomolecular perturbations induced by  
64 environmental insults (26,27). Histopathology-based toxicological studies in fish (28–30) and  
65 bivalves (31,32) have shown to be useful for water quality monitoring and assessment. The  
66 application of histopathology to millimeter-size sentinel species used in ecotoxicology would  
67 enable the analysis of tissue-specific toxicity phenotypes in the whole animal. However,  
68 identification of affected cell and tissue types requires prior knowledge of normal structure,  
69 which is generally only possible through atlases.

70

71 Here, we present the first curated web-based histology atlas for both female and male *D. magna*,  
72 further broadening the discovery capacity of this sentinel species. We optimized methods for *D.*  
73 *magna* histology and created a collection of digitized histological images for adult female and  
74 male *D. magna* in three anatomical planes to elucidate sexual dimorphism by environmentally  
75 induced phenotypic plasticity. We included the first proof-of-concept application of this atlas by  
76 comparing tissue of clonal replicates of the same genotype of *D. magna* under control conditions  
77 (no chemical exposure) with replicates exposed to an over-the-counter painkiller,  
78 acetaminophen. This common pharmaceutical substance is found in surface waters and  
79 wastewater throughout the world (33). Besides its therapeutic effects, it is known to induce  
80 toxicological outcomes if overdose (34,35). This benchmarked resource for mechanistic  
81 toxicology using *Daphnia* is made open-access and interactive, allowing smooth magnification  
82 with a dynamic scale bar. Anatomical structures are highlighted and labeled corresponding with  
83 an anatomical ontology, providing researchers and chemical risk managers with an  
84 unprecedented tool to navigate both normal and abnormal microanatomical structures of organs,  
85 tissues, and cell-types. This resource has the potential to support tissue-specific and whole-  
86 organism phenotyping, informing (eco)toxicology, genetics and phenomics studies.

87

## 88 **2. Material and methods**

### 89 *2.1 Daphnia magna* culturing

90 A commercial strain of *D. magna* was purchased from Carolina Biological (NC, USA) and raised  
91 in "Aachener Daphnien-Medium" or ADaM at room temperature (20°C ± 1°C) under a 16-hour

92 light/8-hour dark photoperiod. *D. magna* cultures were fed three times weekly with  $3.0 \times 10^7$   
93 cells/ml of green microalgae (*Raphidocelis subcapitata*) and once a week with 0.1 mg/mL of  
94 dissolved bakers' yeast. The animal density was maintained at about 20 neonates, 10 juveniles  
95 and 6 to 8 reproducing adults per liter to prevent overcrowding. Under these conditions, animals  
96 reached maturity at 6 to 8 days post-birth and reproduced parthenogenetically every 3 days after  
97 sexual maturation with an average of 15 neonates per brood from the second brood onwards.  
98 Production of males was induced by overcrowding (>10 reproducing adults per liter) and shorter  
99 photoperiod (8 hours) (36).

100

## 101 2.2 Chemical Exposure

102 Reproducing female *D. magna* (approximately 10 days old and carrying the second  
103 parthenogenetic brood 2 hours post-ovulation) were exposed to 5 concentrations of  
104 acetaminophen (5, 15, 25, 35, 50 mg/L). Gravid *D. magna* were used for this exposure to  
105 evaluate the toxic effects of acetaminophen on both adults and developing embryos. The  
106 exposures lasted for 72 h and were conducted with two adult females in 200 ml medium. The  
107 medium was replenished, and the animals fed daily. After 72 h exposure, each surviving animal  
108 was prepared for histological observations as described in the following.

109

## 110 2.3 Histological Processing

### 111 2.3.1 Fixation and decalcification

112 Exposed and control clones of *D. magna* were fixed with 20X Bouin's solution (Newcomer  
113 Supply, WI) and incubated for 48 h at room temperature (about 21°C) on a low-speed orbital  
114 shaker (Corning LSE) set to 55 revolutions per minute (RPM). The fixation is done to preserve  
115 tissues from decay due to autolysis or putrefaction. After the fixation step, samples were washed  
116 twice with 1X phosphate-buffered saline (PBS) for 10 min. This washing step was followed by  
117 decalcification in 20X sample volume of pre-chilled 6% formic acid (Sigma-Aldrich, MO) for 24  
118 h on the orbital shaker set to 55 RPM. Samples were then rinsed in 70% ethanol for one minute  
119 and immersed in fresh 70% ethanol for 30 min before agarose embedding. Different fixation  
120 methods were compared before opting for the Bouin's solution. We tested fixation using 4%  
121 Paraformaldehyde in 0.1M phosphate buffer (pH 7.4) (Bioenno LifeSciences, CA) and 10%

122 Buffered Formalin Phosphate (Fisher Scientific, ON) with different fixation times and  
123 temperatures (Supplementary Table 1).

### 124 2.3.2 Agarose embedding

125 Agarose embedding using a mold or an array facilitates consistent positioning and orientation of  
126 millimeter-size samples for sectioning (37,38). Adapted from Sabaliauskas et al. (2006)(39), a  
127 mold was designed and 3D -printed for casting an agarose block with wells that could hold up to  
128 18 adult *D. magna* for concurrent tissue processing and sectioning . To create an agarose block,  
129 laboratory labeling tape (VWR) was wrapped tightly around the mold. Then, 2.5 mL of 1 %  
130 agarose (Sigma-Aldrich, MO) at 55 °C was pipetted onto the mold and allowed to solidify at  
131 room temperature. The agarose block was removed gently from the mold. Each fixed *D. magna*  
132 sample was pipetted with a small volume of ethanol and transferred into the well of the agarose  
133 block using a single-use plastic transfer pipette. Samples designated for the sagittal plane  
134 sectioning were laid on their sides with a swimming antenna in the wells and all rostra facing the  
135 same direction (see Supplementary Figure 1 for *Daphnia* anatomy and Supplementary Text 1 for  
136 *Daphnia* anatomy glossary). Samples designated for coronal and transverse orientation were laid  
137 on their back in the wells. Once all samples were positioned in individual wells, excess ethanol  
138 was carefully dried off using lint-free Kimwipes without touching the samples. Each sample was  
139 first topped-off with one drop of molten 1 % agarose (about 50 °C) without disturbing the  
140 sample, followed by a thin layer of 1% agarose to completely cover the sample. After the agarose  
141 layer solidified (about 5 min at room temperature), the block was trimmed as needed, placed into  
142 a tissue cassette, and stored in 70 % ethanol for tissue processing.

143

### 144 2.3.3 Tissue processing, sectioning, and staining

145 All samples were dehydrated in graded ethanol and infiltrated with Formula R paraffin (Leica  
146 Biosystems #3801450) in RMC Model 1530 automated closed reagent type tissue processor  
147 (Supplementary Table 2). Following this step, they were serially sectioned at 5 µm on a Leica  
148 RM2255 automated rotary microtome. Sections were then stained with Harris' hematoxylin and  
149 eosin in an auto-stainer (Sakura Tissue Tek DRS 2000, IMEB, CA) following a protocol adapted  
150 from Copper et al. (2018) (40) where the duration of hematoxylin staining was extended from 3

151 to 7 min to achieve better contrast for samples fixed with Bouin's solution (Supplementary Table  
152 3). Cover glasses No. 1 (Platinum Line) were used for cover-slipping.

153

## 154 2.4 Histology slide digitization

155 All slides were screened using an Olympus BX41 microscope and 10X and 20X objective lenses.  
156 Those selected for the atlas were scanned at 40X using an Aperio AT2 slide scanner (Leica  
157 Biosystems, IL) and images were saved in TIFF format. 40X scanning was performed using 20X  
158 objective lens (0.075 n.a. Plan Apo) with 2X optical magnification changer, yielding a digital  
159 resolution of 0.25-micron per pixel. The images of *D. magna* samples included in the atlas were  
160 cropped using Aperio ImageScope (version 12.4.3.5008). Three channels (Red, Green, Blue) of  
161 these digital slides were stacked using Fiji (41) or ImageJ (42). Then, image processing was  
162 performed in Adobe Photoshop (version 22.1.1) where images were rotated and set to have the  
163 same canvas size; the image background was removed using "Remove Background"; the  
164 "Exposure" was adjusted to fall between 0.1 to 0.25 and the same value was used for each set of  
165 images; and "Levels" were adjusted using preset "Midtones Darker". Each set of digital slides  
166 was then pyramidally tiled for the web-based viewer.

167

## 168 2.5 Digital labeling of anatomical structures

169 The anatomical ontology, consisting of a list of anatomical terms organized by groups (organ  
170 systems) and subgroups (tissues and cell types), was created for the atlas (Supplementary File 1).  
171 We cross-referenced the extensive work of Fryer (43) with other published literature (44–70) and  
172 decided on the commonly used *Daphnia* anatomical terms. Annotation and labels for each  
173 anatomical structure presented on the atlas were created using Adobe Illustrator (version 25.1).  
174 One image at a time, each anatomical structure was annotated by outlining the structure using the  
175 "Curvature" and assigned a color corresponding with the anatomical ontology. Annotation and  
176 labels of each structure were saved under "Layers". After completion of the labeling of all  
177 anatomical structures on a given image, the annotation was exported in a single scalable vector  
178 graphic (SVG) to be used as input for the web-based viewer.

179

180



## 181 2.6 Building the web-based digital slide visualization platform

182 The file size of a set of digitized images is > 4 GB, making access challenging for users with  
183 standard computational resources. To improve accessibility and usability we developed an open-  
184 access, web-based digital slide viewing platform based on the open-access project  
185 OpenSeadragon (<https://openseadragon.github.io/>). This interface removes the need to download  
186 full-resolution images. The viewer combined annotations and digital scans into a seamless  
187 experience to provide user-friendly access to high-resolution data. The atlas' code was written in  
188 client-side JavaScript, HTML, and CSS. Pyramidally tiled images were parsed and visualized  
189 with OpenSeadragon. When the user opens an image, the viewer will open the corresponding  
190 SVG file containing all the anatomical labels and their corresponding shape vector information.  
191 The viewer parses all labels from the SVG file, plotting the corresponding regions, and updates  
192 the ontology to note which regions are available to visualize on a particular image.

193

## 194 3. Results and discussion

195 3.1 *Daphnia magna* histology atlas presenting *Daphnia* microanatomy  
196 and enabling the discovery of aberrant phenotypes

### 197 3.1.1 Interactive viewer for *Daphnia* Histology Reference Atlas (DaHRA)

198 We developed the *Daphnia* Histology Reference Atlas (DaHRA; <http://daphnia.io/anatomy/>), a  
199 user-friendly interface to access a collection of digitized histological sections, including wildtype  
200 female and male *D. magna* in three standard anatomical planes (Figure 1), and *D. magna*  
201 exposed to 25 mg/L acetaminophen (Figure 2; <http://daphnia.io/anatomy/treatments/>).

202

203 The interface allows users to visualize digital scans (0.25-micron per pixel resolution) with and  
204 without annotations of anatomical structures. The anatomical ontology (Supplementary File 1)  
205 including of all the anatomical structures can be found on the left side of the viewer, with the  
206 anatomical terms arranged alphabetically within 8 groups: circulatory, digestive, excretory,  
207 locomotive and respiration, muscular, nervous, sensory and vision, post-abdomen, and  
208 reproductive (Figure 1B). Annotations of the anatomical structures are presented as color  
209 overlays and indicated by check marks next to the anatomical terms. Unchecking the box hides



210 the color overlays. Anatomical terms with underlined labels indicate nested substructures (for  
211 example, “microvilli” under “epithelial cell”, both under “midgut”). Hovering over an  
212 anatomical term in the ontology dynamically highlights the corresponding structure or structure  
213 groups in the viewer, temporarily hiding other checked structures. A collection of abnormal  
214 anatomical structures of *D. magna* exposed to 25 mg/L acetaminophen is shown under  
215 “Histopathology” (Figure 2B).  
216

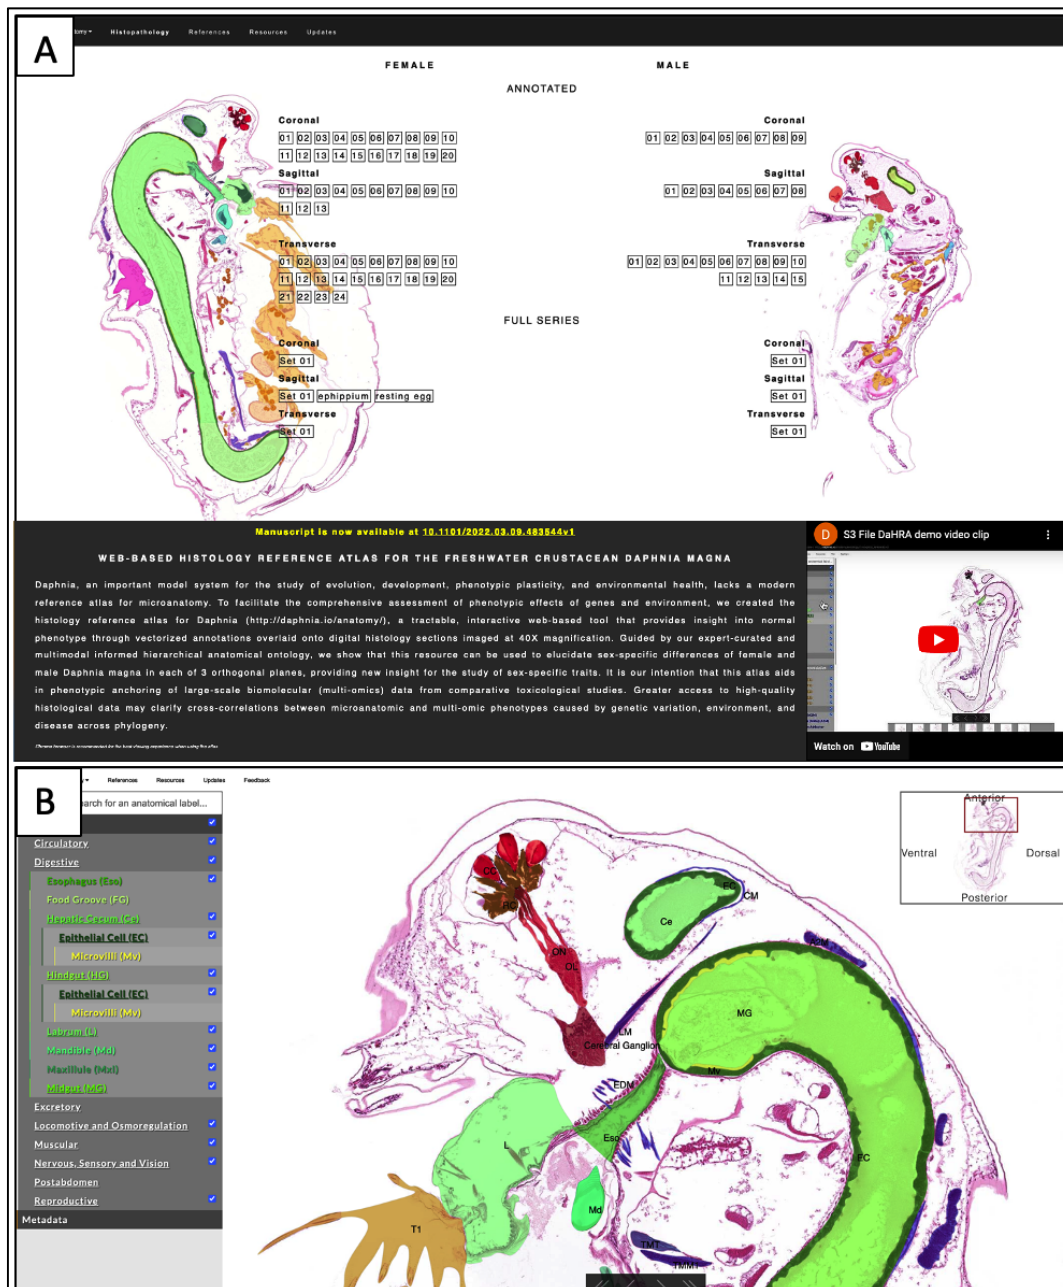

218 **Figure 1. Overview of the interactive web-based viewer for DaHRA.** (A) Landing page  
219 hosting all annotated and unannotated histology images of the same female and male strain of *D.*  
220 *magna* with an instruction video describes the features of the atlas. (B) Interactive viewer  
221 displaying the expandable list of anatomical structures on the left; the checked boxes indicate the  
222 structures labeled in the image. The anatomical terms on the image are shown as acronyms;  
223 hovering the mouse cursor over an acronym or its corresponding region will show the full term.  
224 Unchecking a box will hide the color overlay and annotation corresponding to the box.

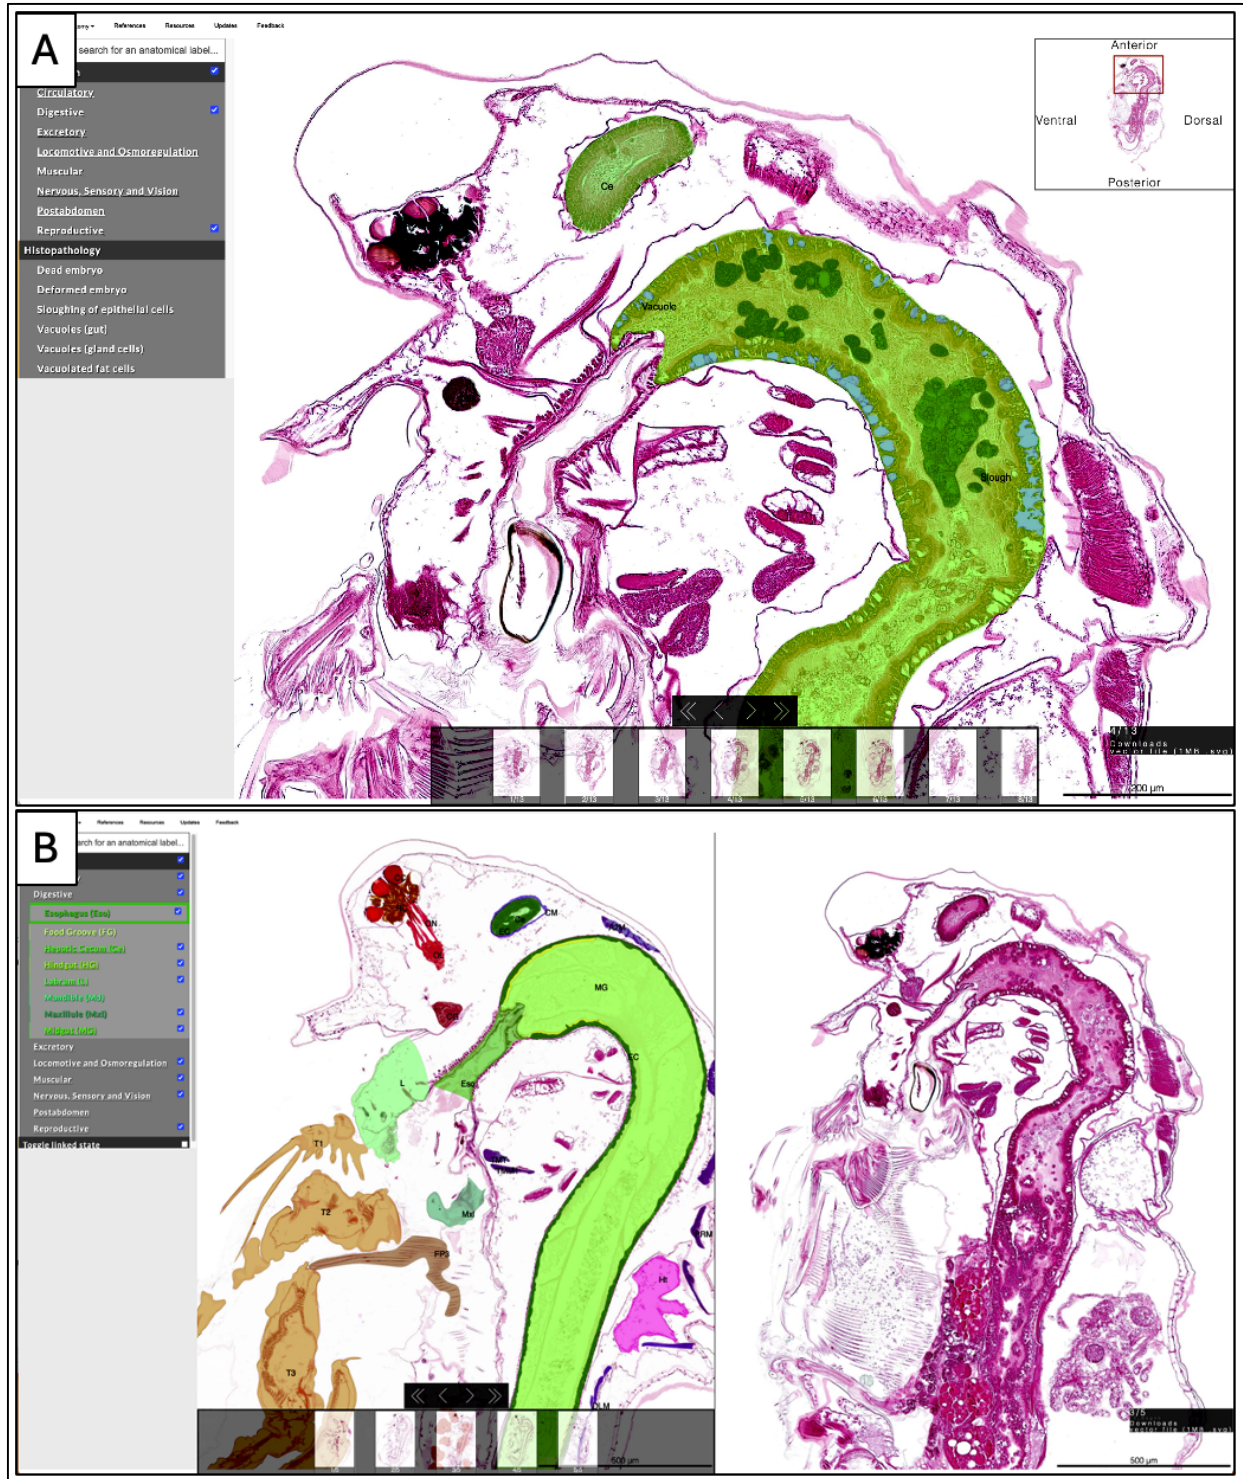

225  
226 **Figure 2. Overview of the atlas displaying annotated histopathological data.** (A) The  
227 checked boxes in the anatomical ontology indicate the affected structures overlaid with  
228 annotation and the observed abnormalities listed under “histopathology”. (B) Viewer comparing  
229 the non-exposed (left) to the acetaminophen-exposed (right) *D. magna*.  
230

231

### 232 3.1.2 *Daphnia magna* male and female microanatomy

233 DaHRA presents the first microanatomical representation of female and male *D. magna* from the  
234 same genotype. All organs and cell types included in the anatomical ontology are briefly  
235 described here with representative images from the three anatomical planes of the female (Figure  
236 3A-C) and male *D. magna* (Figure 3D-F). The terminology used for the DaHRA anatomical  
237 ontology (a list of terms organized by groups and subgroups) was cross-referenced with  
238 published literature (43–69) for uniformity. We identified 50 anatomical structures, and  
239 categorized them in 8 groups (circulatory, digestive, excretory, locomotive and respiration,  
240 muscular, nervous, sensory and vision, postabdomen, and reproductive), and can be expanded if/  
241 when more structures are identified.

242  
243 Here, we first summarize the sexually dimorphic traits in *D. magna* and follow with a brief  
244 description of the normal anatomy and microanatomy. Apart from the obvious differences in  
245 body size and reproduction organs, *D. magna* presents other sexual dimorphisms that can be  
246 clearly visualized and compared on the atlas. Generally, the body size and first antennae or  
247 antennules of *D. magna* differ between the sexes. Adult males have a smaller body size but much  
248 longer antennules bearing a single long peg or flagellum on the tip (Figure 3D'). Male antennules  
249 are also composed of muscle tissue (Figure 3D) that is absent in females. The first thoracic limbs  
250 of the males are equipped with elongated setae (Figure 3E) and chitinized copulatory hooks  
251 (Figure 3F) that are used for clasping females during copulation. The male postabdomen has  
252 gonopores (Figure 3D inset) that are involved in transferring mature spermatozoa from the testes  
253 to the female in the region of the oviduct during copulation. Besides having a wider frontal  
254 opening, pubescence and thickened angular margins are also observed at the ventral margin of  
255 the carapace in males (indicated by arrows in Figures 3E and 3F). Fat cells in males are different  
256 from those found in females. Male fat cells contain much larger lipid droplets, reduced and less  
257 granular cytoplasm, and smaller nucleoli than female fat cells (Figure 4).



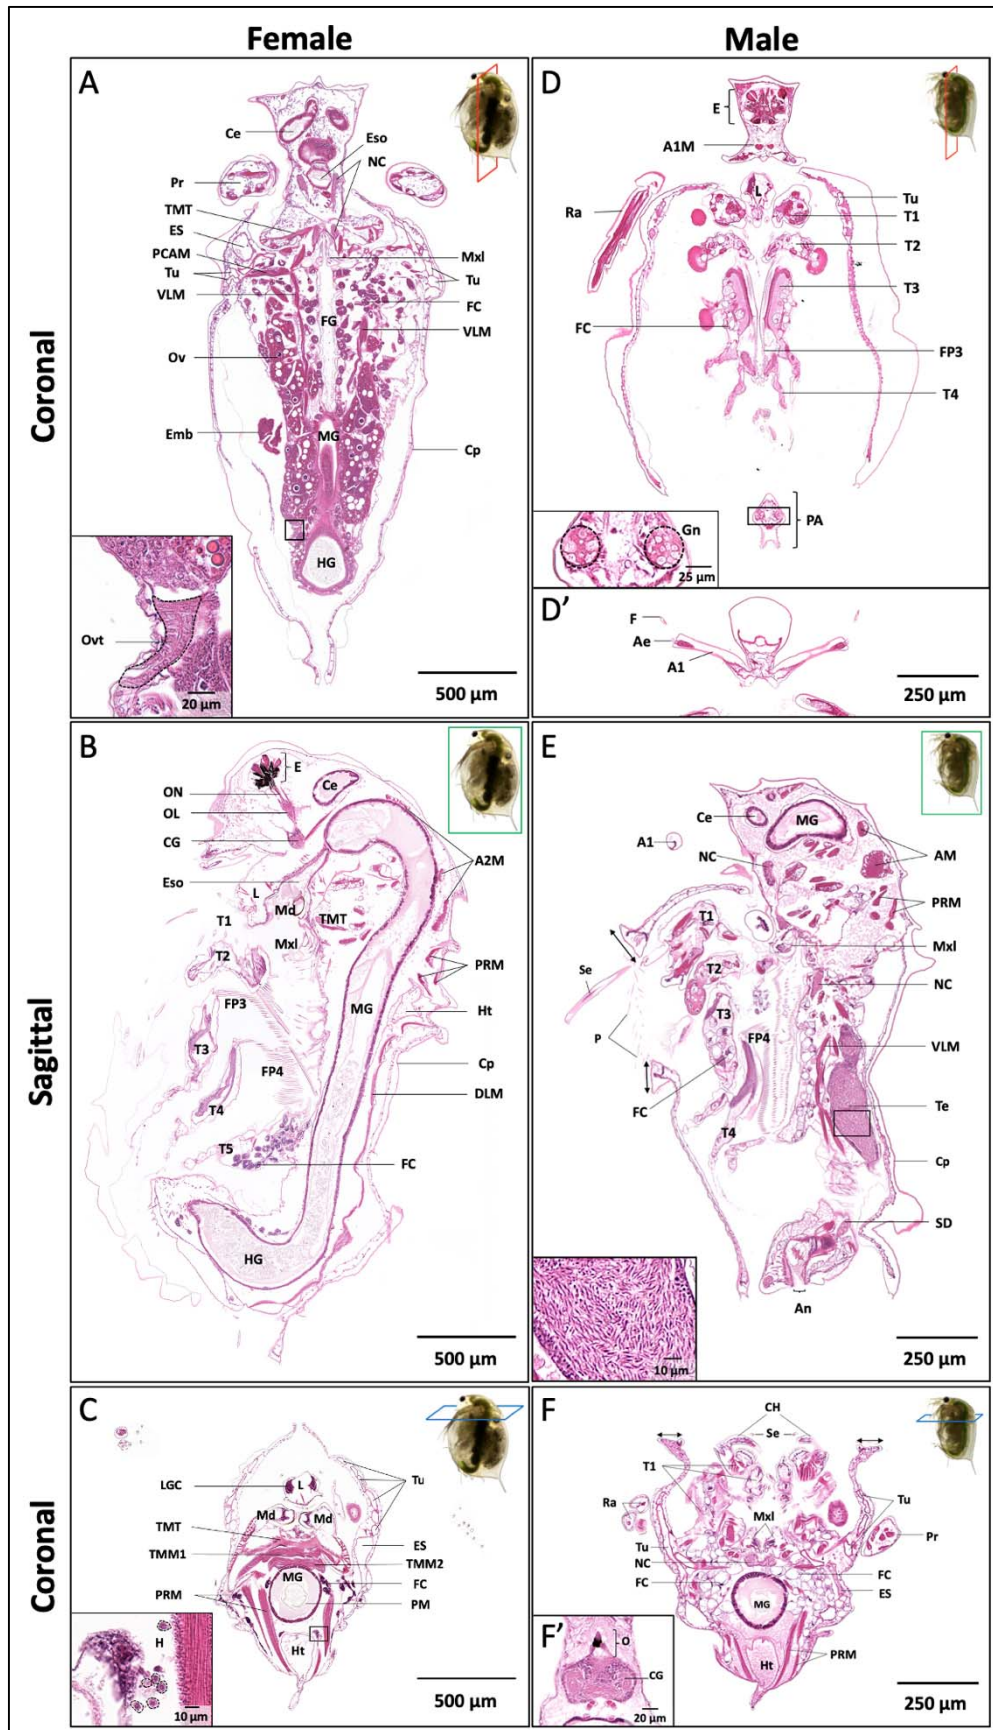

259 **Figure 3. Representative microanatomical structures of female (A-C) and male (D-F') *D.***  
260 ***magna* in the three orthogonal planes.** The coronal plane (panel A and D) displays most of the  
261 structures in pairs. Inset of panel A shows the oviduct (Ovt; dotted circle) and inset of panel D  
262 shows gonopores (Gn) in the male. Panel D', slightly ventral to panel D, displays the prominent  
263 and elongated antennules (A1) with flagella (F) at the tips. The sagittal plane of the female  
264 (panel B) displays the connection of the compound eye (E) to the optic lobe (OL) and cerebral  
265 ganglia (CG) by optic nerves (ON). The labrum (L), maxillules (Mxl), and mandibles (Md) are  
266 anterior to the esophagus (Eso) that opens into the midgut (MG) and is followed by the hindgut  
267 (HG). This section also cuts through the five thoracic limbs (T1-5) and filter plates (FP3, FP4).  
268 The sagittal plane of the male (panel E) shows the elongated seta (Se) on the first thoracic limb,  
269 pubescence (P) at the wider ventral opening of the carapace, thickening of carapace at the ventral  
270 opening (arrows), one of the testes (Te), and a small portion of sperm duct (SD). Inset of panel E  
271 showing the spermatozoa in the testis. The transverse plane of the female (panel C) shows the  
272 asymmetrical paired mandibles (Md) with the transverse mandibular tendons (TMT), transverse  
273 mandibular muscles (TMM1), transverse muscles of mandibles (TMM2), and the posterior  
274 rotator muscles of mandibles (PRM). Inset of panel C displays several hemocytes (H) outlined  
275 by dotted circles. The transverse plane of male (panel F) displays the paired copulatory hooks  
276 (CH) on the first thoracic limbs (T1) and the thickening of the carapace (arrows) at the ventral  
277 opening. This also shows the abundance of fat cells (FC) which are quite different from those in  
278 the female. Panel F', slightly above that of panel F, shows the pigmented ocellus (O) is  
279 connected to the cerebral ganglion (CG). A1M, antennule muscle; A2M, antennal muscle; Ae,  
280 aethetasc; An, anus; Ce, hepatic cecum; Cp, carapace; DLM, dorsal longitudinal muscle; ES,  
281 end sac of the maxillary gland; FG, food groove; Ht, heart; LGC, labral gland cell; NC, nerve  
282 chord; PA, postabdomen; PCAM, posterior carapace adductor muscle; PM, peritrophic  
283 membrane; Ra, ramus of swimming antenna; Tu, tubule of the maxillary gland; VLM, ventral  
284 longitudinal muscle.

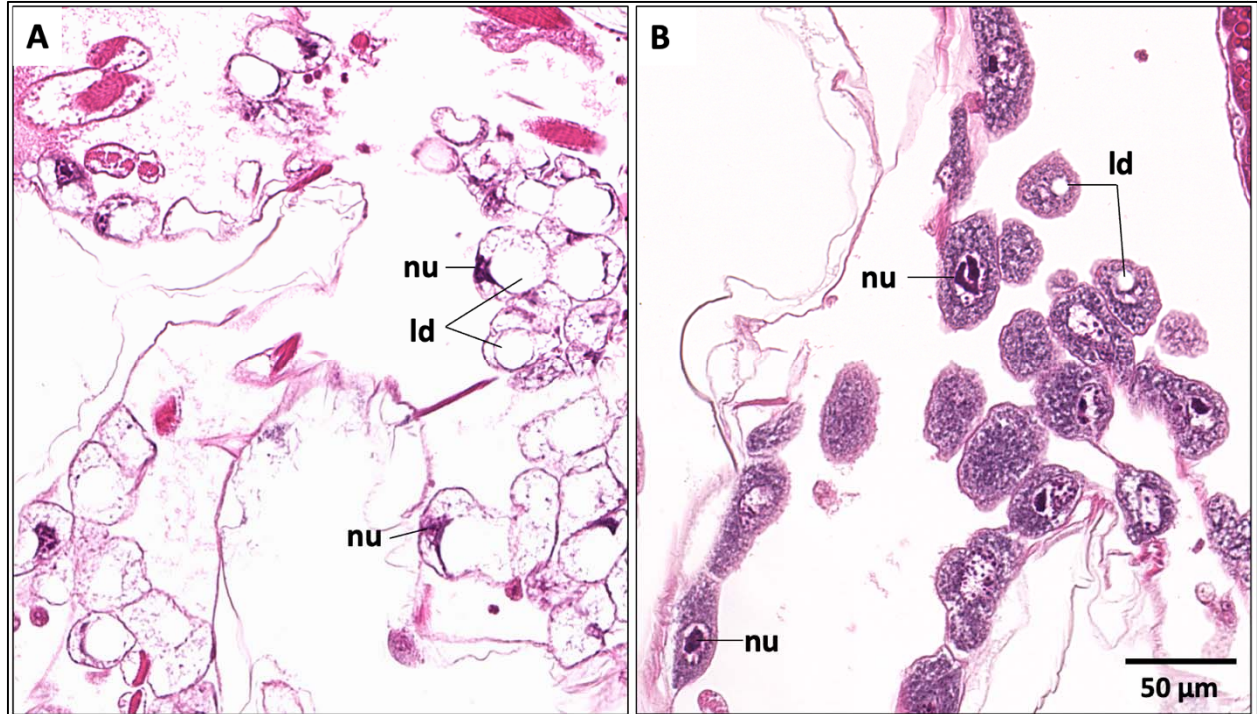

285  
286 **Figure 4. Comparison of male and female fat cells.** (A) Fat cells in males consist of larger  
287 lipid droplets (ld), reduced and less granular cytoplasm with smaller nucleoli (nu) situated at the  
288 cell periphery. (B) Fat cells in females have more granular cytoplasm with smaller lipid droplets  
289 (ld) and bigger nucleoli (nu) often appeared subdivided and situated in the cell centers.  
290

291 *Circulatory system.* *Daphnia* have an open circulatory system and a myogenic heart (63,64). As  
292 *Daphnia* are semi-transparent, the beating heart can be easily observed. Hemolymph (blood-like  
293 fluid) containing hemocytes (Figure 3C inset) (45,59) is pumped through the body cavity. In line  
294 with literature records, we observe that the *Daphnia* heart has a pair of ostia situated in the  
295 immediate anterior of the brood chamber, between the midgut and the dorsal surface (Figure 3B,  
296 6C, 6F). Synthesis of hemoglobin happens in fat cells and epipodite cells (on thoracic limbs)(53).  
297

298 *Digestive system.* *Daphnia* are filter feeders. Food particles are filtered through filter plates (FP3  
299 and FP4) consisting of setae on thoracic limbs 3 and 4, passed through maxillules and mandibles  
300 into the esophagus, which is the first part of the digestive system (Figure 3A and B). The  
301 digestive system also consists of paired hepatic ceca, midgut, and hindgut (Figures 6A-C, 6E-F)  
302 that are lined with epithelial cells and microvilli, with the columnar epithelial cells in the midgut,  
303 and the cuboidal cells in hepatic ceca and hindgut (61,65). The labrum houses labral glands that  
304 have been suggested to be involved in food ingestion and endocrine function (69,70) (Figure 3B-  
305 D).



306

307 *Excretory system.* The maxillary gland, also known as the shell gland, is the organ of excretion,  
308 housed between the inner and outer walls of the carapace (62). It consists of an end sac, a series  
309 of tubules, and an opening that is situated within the anterior part of the brood chamber (Figure  
310 3A, C, D and F).

311

312 *Locomotive and osmoregulation system.* The second pair of antennae, usually referred to as  
313 swimming antennae, is the primary organ of locomotion (43). Each swimming antenna has a  
314 protopodite, two rami bearing setae (44) (Figure 3C, D, and F), and is supported by antennal  
315 muscles. *Daphnia* have five thoracic limbs (47) (Figure 3B, D, and E). Movements of thoracic  
316 limbs produce a constant current that brings food particles into the digestive tract (43,46) and  
317 facilitates osmotic regulation, which occurs in the epipodite on each thoracic limb (56). First  
318 thoracic limbs in male are different from the female *Daphnia*, with only the male having the  
319 chitinized copulatory hooks (Figure 3F) and longer setae (Figure 3E).

320

321 *Muscular system.* The muscular system is very prominent and occupies a significant portion of  
322 the body (43,48). The largest muscles are ventral and dorsal longitudinal muscles that extend  
323 along the gut, three paired antennal muscles, transverse mandibular muscles, transverse muscles  
324 of mandibles, posterior rotator of the mandibles, carapace adductor muscles, followed by groups  
325 of muscles that allow the motion of thoracic limbs and postabdomen (Figure 3). Other small  
326 muscles include those around the compound eye, labrum, and esophagus (50). All muscles are  
327 striated and surrounded by sarcoplasm, which contains many nuclei and is mostly vacuolated.  
328 Sarcoplasm is particularly abundant and more vacuolated in the antennal muscles. Male  
329 antennules also carry muscles (Figure 3D) that are absent in the females.

330

331 *Nervous, sensory, and vision systems.* *Daphnia* have a pigmented compound eye consisting of 22  
332 ommatidia (Figure 3B) and a light-sensing, pigmented nauplius eye or ocellus with four lens-like  
333 bodies (Figure 3F') (66). Each ommatidium contains eight reticular cells sending a parallel  
334 bundle of axons, collectively as the optic nerve into the optic lobe, which is then connected to the  
335 cerebral ganglia (Figure 3B). The cerebral ganglia are connected to two chains of nerve cords  
336 that run along the thorax, underneath the gut, and reach other anatomical structures (57,58)

337 (Figure 3A, E, and F). Both sexes have a pair of antennules bearing a group of 9 olfactory setae  
338 or aesthetascs (71,72) but the male antennules are more prominent and elongated, uniquely fitted  
339 with flagella at their tips (Figure 3D').

340

341 *Reproductive system.* The ovaries in females are paired tubular structures ended with oviducts  
342 (Figure 3A). *Daphnia* are cyclical parthenogens, which means that sexual (meiotic) and clonal  
343 (ameiotic) reproduction alternate (73). Under favorable environmental conditions, females  
344 produce parthenogenetic eggs that are genetically identical to themselves. During clonal  
345 reproduction, happens in clusters where each cluster of four oocytes are formed. Only one  
346 definitive oocyte will accumulate yolk granules and lipid droplets during maturation and the  
347 others will transform into nurse cells (60) (Figure 5A). After maturation, parthenogenetic eggs  
348 (Figure 5A) are released into the brood chamber through oviducts and fully developed, free-  
349 swimming juveniles are extruded after 3 to 4 days. Sexual reproduction is cued by environmental  
350 change, such as photoperiod, temperature, and over-crowding, which triggers the  
351 parthenogenetic production of genetically identical males for mating with receptive females for  
352 sexual recombination; the end point are two embryos that ultimately enter a state of diapause.  
353 Unlike parthenogenetic embryos, the development of these resting embryos is arrested at the  
354 3000-cell count and enters dormancy (74). The resting embryos are encased in a chitin shell  
355 called an ephippium that protects them from harsh environmental conditions (Figure 5C)  
356 including freezing and desiccation. Dormancy in *Daphnia* can be exceptionally long, lasting  
357 decades and even centuries (75,76). The resting embryos hatch when cued by favorable  
358 environmental conditions. A proportion of these resting embryos is not exposed to environmental  
359 cues and remains buried in lake sediment, from where it can be isolated, revived and maintained  
360 in the laboratory through parthenogenetic reproduction (77,78).

361

362 Testes of male *Daphnia* consist of two long tubular structures connected to gonopores or  
363 ejaculatory openings by sperm ducts (Figure 3D and E). Spermatogenesis begins at the testes'  
364 walls, and mature spermatozoa are displaced inward toward the central region of the testes (67).

365

366 Fat cells, which are polyploid (79) and consist of a massive portion of lipid and glycogen (68),  
367 are typically found along the trunk, around ovaries or testes, and on the epipodites of the thoracic

368 limbs (Figure 3). They are most likely sites of vitellogenin synthesis (68). In the females, these  
369 cells contain one or several lipid droplets of various size and one large nucleolus of irregular  
370 shape, which often appears sub divided into two or more pieces. Compared to the female fat  
371 cells, male fat cells contain much larger lipid droplet, reduced and less granular cytoplasm, and a  
372 smaller nucleolus that usually is situated at the cell periphery (Figure 4).

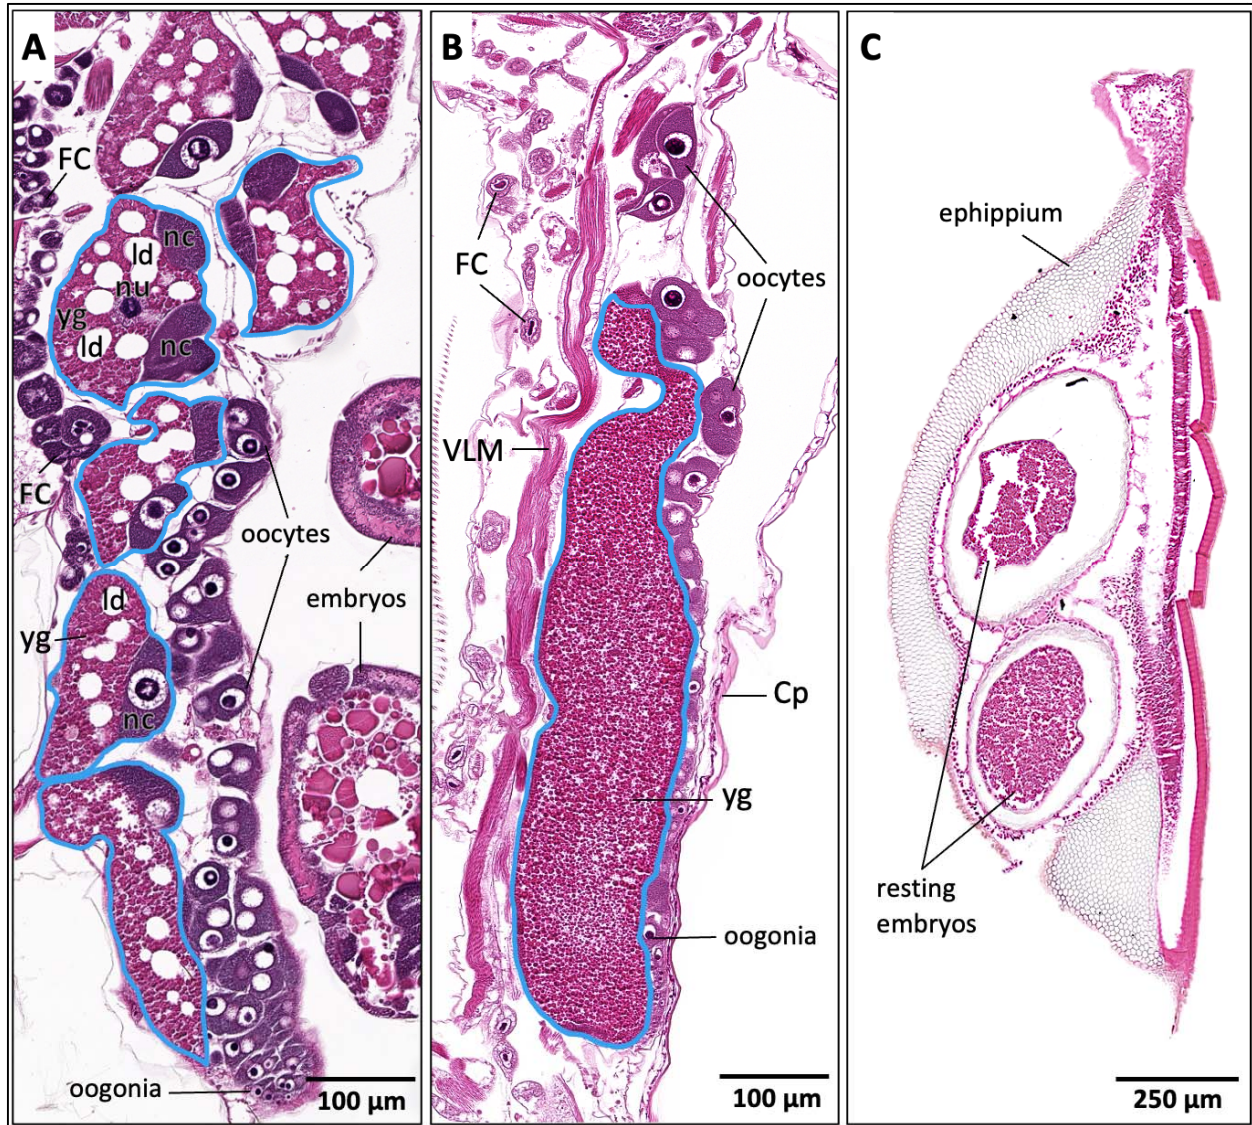

373

374 **Figure 5. Comparison of parthenogenetic and sexual eggs.** (A) The parthenogenetic eggs  
375 contain a large amount of lipid droplets (ld) and yolk granules (yg). (B) The sexual eggs contain  
376 a large proportion of fine yolk granules without lipid droplets. (C) Resting embryos encased in  
377 the ephippium. Top embryo shows artifact. Cp, carapace; FC, fat cells; nc, nurse cell; nu, the  
378 nucleus of oocyte; VLM, ventral longitudinal muscle. A solid blue circle indicates an individual  
379 egg.

380



381

### 382 3.1.3 Documenting histopathological change using DaHRA

383 To illustrate a key application of the DaHRA, we included a female *D. magna* exposed to  
384 acetaminophen to demonstrate toxicity effects across multiple organs and tissue types. We  
385 compared tissue architecture in clonal replicates of an exposed and non-exposed *D. magna* to  
386 identify pathological tissue phenotypes linked to chemical exposure.

387

388 Adult gravid *D. magna* exposed to 25 mg/L of acetaminophen for 72 h produced dead or  
389 abnormal embryos. Specifically, the abnormal embryos remained in the chorion, showed  
390 development of the compound eye and the gut precursor, but no visible elongation of body  
391 length, or development of the swimming antennae and thoracic limbs (Figure 6E) after 72h in the  
392 brood chamber.

393

394 Histology of the exposed *Daphnia* also revealed changes in various organs and cell types.  
395 Vacuoles were observed in most fat cells (Figure 6H) and across the digestive system, including  
396 the labral glands (Figure 6F), midgut (Figure 6G) and hindgut (Figure 6H). The midgut and  
397 hindgut of the exposed *D. magna* also showed excessive protruding and sloughing of  
398 degenerated epithelial cells (Figure 6G and H).

399

400 Typically, toxicological effects are quantified through apical endpoints (e.g. immobilization) in  
401 acute exposures (80,81) and fitness-linked life history traits in chronic exposures (82,83). Few  
402 studies employ ultrastructural analysis of a target organ, usually the midgut, for the  
403 histopathological assessment of chemical toxicity (85–88). Sublethal concentration of non-  
404 steroidal drugs have previously been shown to reduce reproduction, growth and to induce  
405 neurotoxicity in *Daphnia* (89–91). Furthermore, acetaminophen has been shown to induce age-  
406 dependent alterations of gene expression and dysregulation of metabolic pathways (92,93). The  
407 tissue toxicity we observe in the adult *D. magna* and its embryos confirms these published  
408 results, highlighting impact on multiple tissues, as well as embryonic failure.

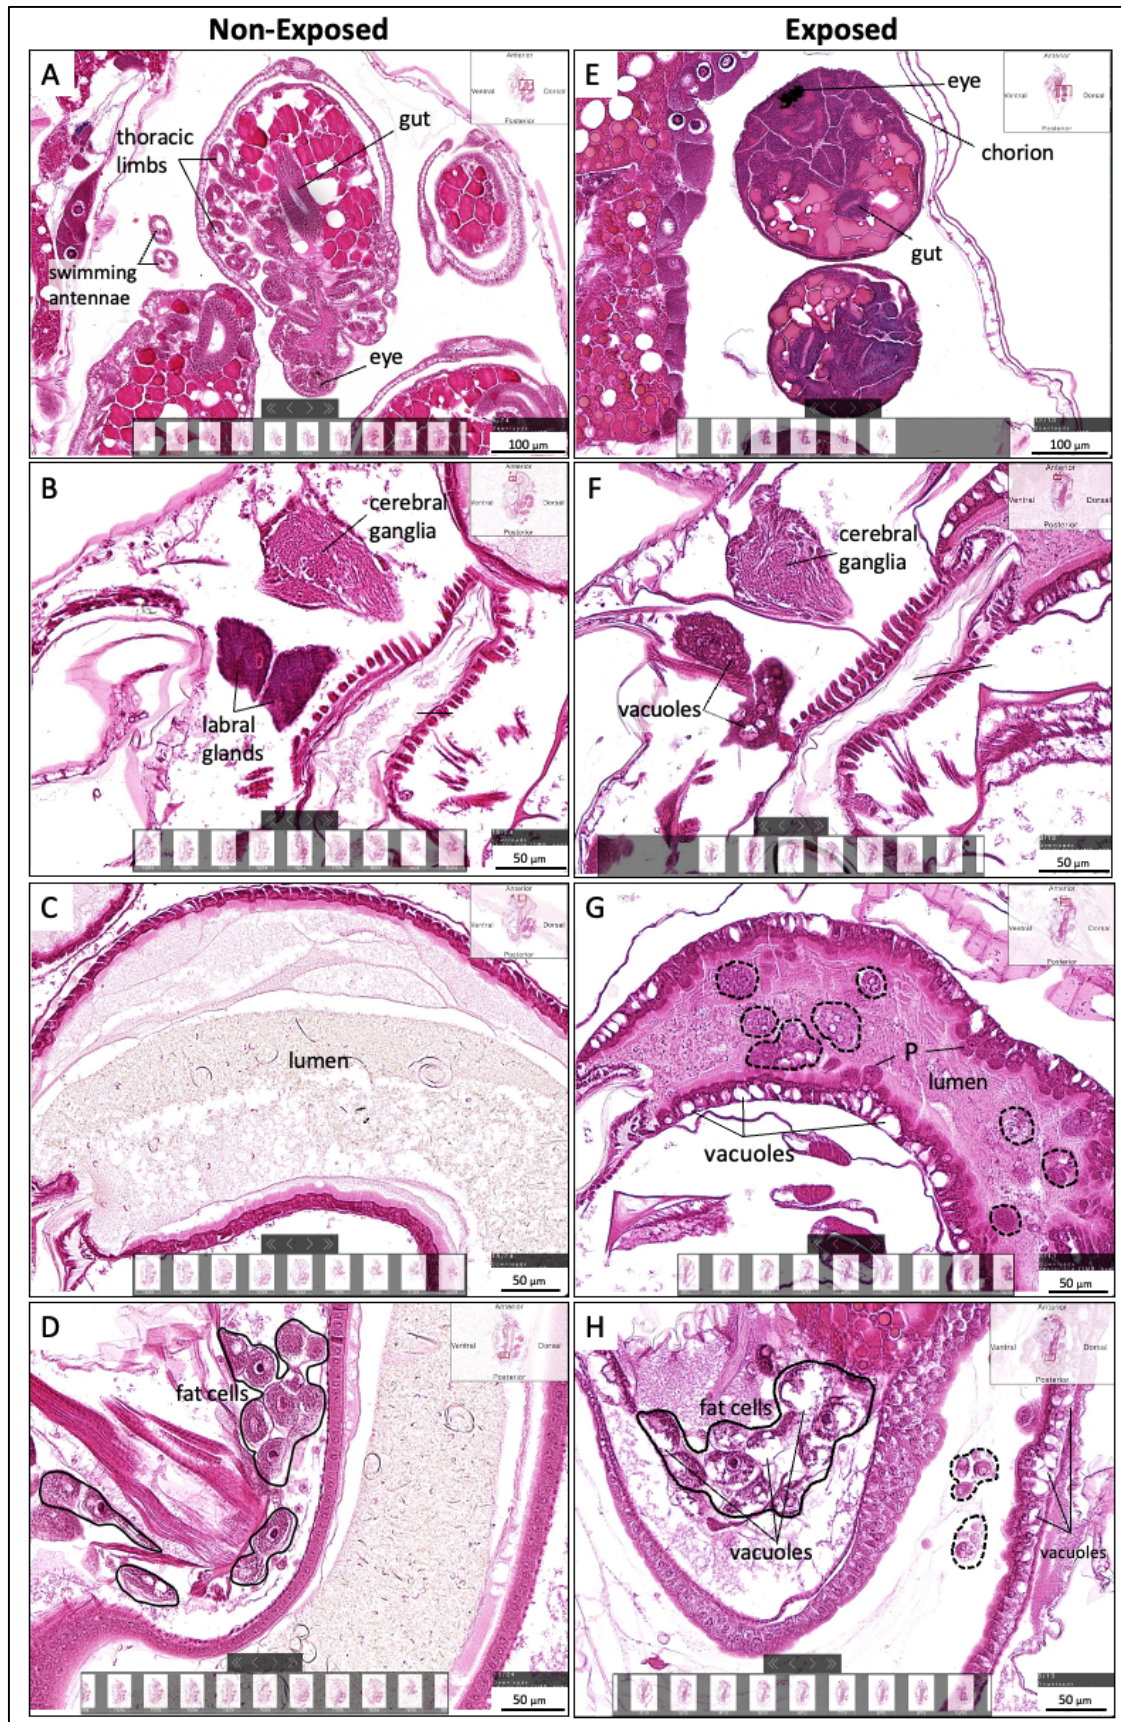

410 **Figure 6. Organ and tissue changes in *D. magna* exposed to acetaminophen (E-H) as**  
411 **compared to a clonal replicate of the same non-exposed strain (A-D). (E)** Malformed  
412 embryos with some development of the compound eye and gut precursors but no visible  
413 development of the swimming antennae and thoracic limbs. **(F)** Vacuoles in the labral glands.  
414 **(G)** Vacuoles, excessive amount of protruding (P) and sloughing of degenerated epithelial cells  
415 (dotted circles) in the midgut of exposed *D. magna*. **(H)** Alteration observed in the fat cells at the  
416 postabdomen region; vacuoles, excessive protruding and sloughing of degenerated epithelial  
417 cells (dotted circles) in the hindgut.  
418

### 419 3.2 Method development for *Daphnia* histology

420 Invertebrates, especially chitinous aquatic invertebrates are challenging to handle for histology,  
421 because of their high tissue water content and the exoskeleton, which has a different texture and  
422 composition than soft tissue. We present here key adaptations of histology methods to *D. magna*,  
423 paving the way to application in other chitinous invertebrates.  
424

425 *Sample fixation.* The accurate representation of microanatomy depends upon the preservation of  
426 tissue structure with minimal distortion and optimal staining allowing a clear distinction between  
427 cell types and subcellular structures. To determine how to generate sections with minimal  
428 distortions for the atlas, we tested three commonly used fixatives: Bouin's solution, 4%  
429 Paraformaldehyde in 0.1M phosphate buffer (PFA), and 10% Neutral Buffered Formalin (NBF).  
430 Bouin's and PFA are commonly used to fix *D. magna*. NBF was also tested because it is the  
431 most used fixative for routine histology of mammalian tissues. The observation of tissue  
432 obtained from these three fixatives showed the clearest results with minimal distortion when  
433 samples were fixed with Bouin's solution at room temperature for 48 hours. This fixative  
434 preserved soft tissues, such as the gut, which are more challenging to maintain intact and allowed  
435 us to visualize microvilli and epithelial cell nuclei distinctively (Figure 7A). Nurse cells (nc),  
436 oocytes (oo) and yolk granules (yg) were observed intact in the ovaries (Figure 7B) and cellular  
437 features across the developing embryos (Figure 7C) were also more clearly visible in samples  
438 fixed with Bouin's as compared to PFA and NBF.

439  
440 The *D. magna* samples (N=23) fixed using PFA and NBF showed "ballooning", a severe fixation  
441 artifact causing the carapace to 'puff-up' (Supplementary Figure 2). Inconsistent tissue  
442 preservation and distortion in some microanatomical structures were also observed when using



443 these fixatives Particularly, the epithelial cells were not as distinct as when using the Bouin's  
444 fixative, and the microvilli were generally not visible in the gut (Figure 7D and 7G). In the  
445 ovaries, oocytes and nurse cells were compromised and challenging to be identified due to the  
446 tissue damage (Figure 7E and 7H). The developing embryos also showed less cell clarity (Figure  
447 7H and 7I). In sum, Bouin's solution was observed to be the best fixative for *D. magna* whole-  
448 organism histology and was used to fix all samples used in this atlas.



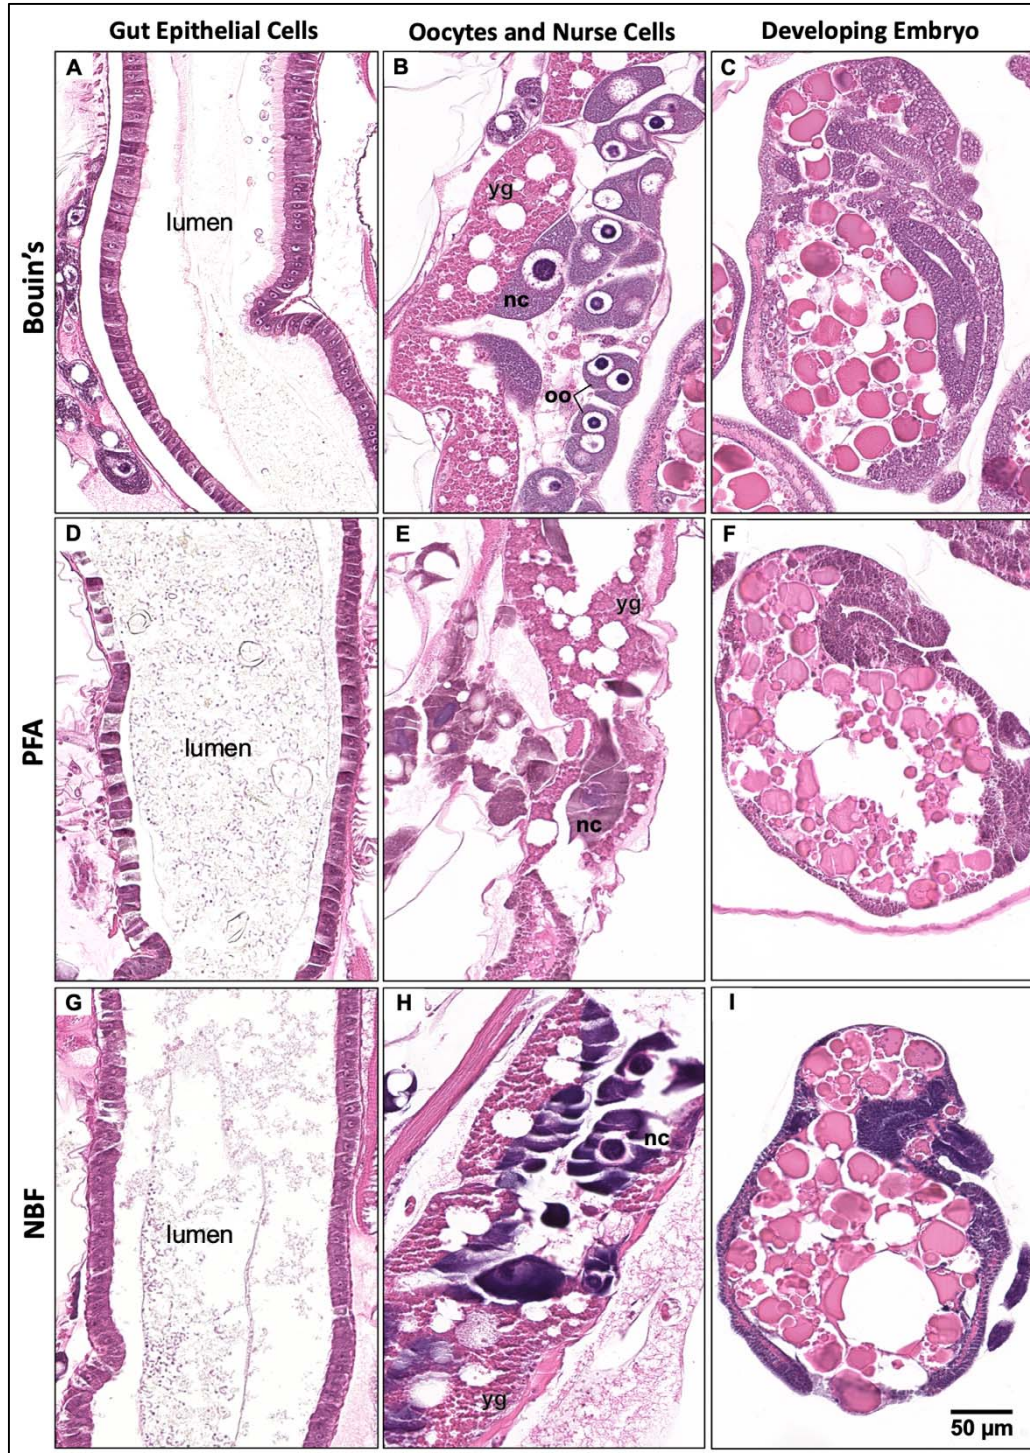

449

450 **Figure 7. Comparison of histological sections generated with different fixatives: Bouin's,**  
451 **PFA and NBF.** Bouin's fixed samples showing intact gut sections, with microvilli and epithelial  
452 cell nuclei (A), as well as nurse cells (nc), oocytes (oo) and yolk granules (yg) clearly visible in  
453 the ovary (B). In comparison, PFA or NBF fixed samples show less cellular clarity due to the  
454 low preservation of histological sections. Cellular details across the developing embryos are  
455 clearly visible in samples fixed with Bouin's (C) as compared to other two fixatives (F and I).

456 *Sample embedding.* Visualization of anatomical sections in each of the three standard anatomical  
457 planes (coronal, sagittal, and transverse) is critical for understanding organismal anatomy.  
458 Therefore, the ability to generate consistent sections in each of these planes is essential. Agarose  
459 pre-embedding using mold or array facilitates consistent positioning and orientation of  
460 millimeter-size samples for sectioning (37,38). We have applied this criterion to *D. magna*  
461 sections, using custom-designed plastic mold to create agarose blocks with wells that hold  
462 individual fixed *D. magna* samples prior to tissue processing and paraffin embedding. We tested  
463 several designs of casting molds (Supplementary Figure 3) and found that agarose blocks cast  
464 using triangular mold (Figure 8, STL file in Supplementary File 2) allowed consistent and  
465 precise positioning of adult *D. magna* samples (see Materials and Methods for details). Using the  
466 mold for agarose pre-embedding, we were able to embed up to 18 samples per paraffin block for  
467 sectioning.  
468

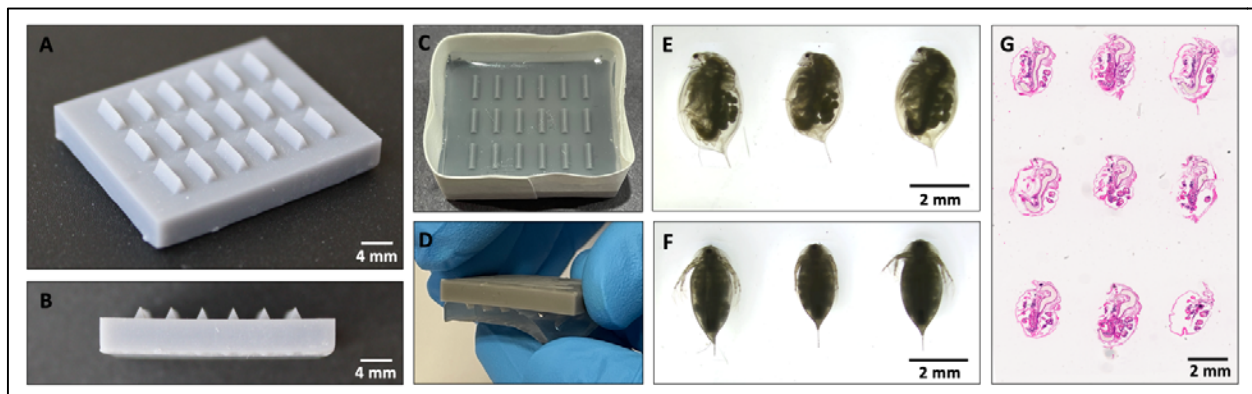

470 **Figure 8. Agarose embedding using casting mold.** (A) Top view and (B) side view of  
471 triangular mold printed by stereo-lithography (3D-SLA) at 25  $\mu\text{m}$  resolution for a smooth surface  
472 allowing easy removal of agarose blocks. (C) Casting 1% agarose block in the taped mold. (D)  
473 Agarose block is removed from the mold after solidification by peeling the gel downwards. *D.*  
474 *magna* samples laid on their sides with a swimming antenna in the wells (E), the rostra facing the  
475 same direction for sagittal plane sectioning and positioned in the wells on their back (F) for  
476 coronal and transverse plane sectioning. (G) Histological section showing the position of  
477 samples at sagittal plane.  
478

479 In summary, to date, *D. magna* lacked comprehensive and annotated histology resources, despite  
480 its regulatory importance as a sentinel of environmental hazards and as a model in ecology, and  
481 evolution. Our open-source visualization platform for *D. magna* histology with its user-friendly  
482 interface that will help the utilization of this tool by non-specialists and students, contributing to

483 the growing resources for ecotoxicogenomics, biology and comparative medicine. Our atlas  
484 provides detailed high-resolution information on tissue-specific phenotypes thereby offering  
485 unprecedented opportunities to identify tissue-specific toxicity and genotype-phenotype  
486 associations. The coupling of histopathological data with tissue-specific biomarkers (e.g., single  
487 cell and spatial transcriptomics) has the potential to revolutionize the assessment of hazardous  
488 substances in non-targeted species based on knowledge of the chemical modes of action. Using  
489 functional conservation of gene and metabolite network across species, the atlas can assist in  
490 revealing tissues target of chemical toxicity across species, including humans (94,95). The  
491 pipeline of our atlas was designed with the capability to expand the ontology as more cell or  
492 tissue being identified and labeled, and with the intent to extend its features to the other model  
493 species. Our ambition is to contribute to the call for cross-species atlas which will be a key  
494 resource for the assessment of phenotypes and diseases (96).

495

## 496 **Supporting Information**

497 Supplementary Table 1. Fixatives and fixation parameters tested for best preservation of whole  
498 *D. magna* samples

499 Supplementary Table 2. Tissue processing steps for serial dehydration and infiltration of *D.*  
500 *magna* samples with Formula R paraffin in tissue processor

501 Supplementary Table 3. Automated steps for staining *D. magna* 5- $\mu$ m sections with Harris'  
502 hematoxylin and eosin in an auto-stainer

503 Supplementary Figure 1. Anatomy of adult male and female *D. magna*

504 Supplementary Figure 2. "Ballooning" artifact observed in *D. magna* sample fixed with 4% PFA  
505 and 10% NBF

506 Supplementary Figure 3. 3D-SLA printed casting molds of different teeth designs that were  
507 tested for orientation and positioning of *Daphnia* samples

508 Supplementary Text 1. *Daphnia* anatomy glossary

509 Supplementary File 1. Anatomical ontology for DaHRA

510 Supplementary File 2. STL file of casting mold with triangular teeth

511

512



## 513 **Acknowledgments**

514 The authors thank Debra Shearer and Chadwick Harris for sectioning the paraffin blocks and  
515 staining the slides. The authors also thank Patrick Leibich and the Department of Surgery, Penn  
516 State College of Medicine for 3D-SLA printing the casting molds. This work was supported by  
517 the Penn State Human Health and Environment Seed Grant funded by Pennsylvania Department  
518 of Health Commonwealth Universal Research Enhancement Program Grant (to KCA) and the  
519 National Institutes of Health (1R24OD18559 to KCC), the Jake Gittlen Laboratories for Cancer  
520 Research. The Department of Health specifically disclaims responsibility for any analyses,  
521 interpretations, or conclusions. This work contributes to the PrecisionTox project  
522 (<https://precisiontox.org/>) that received funding from the European Union's Horizon 2020  
523 research and innovation program under grant agreement No 965406. This output reflects only the  
524 author's view, and the European Union cannot be held responsible for any use that may be made  
525 of the information contained therein.

526

## 527 **Competing Interests**

528 The authors declare no competing interest.

529

## 530 **References**

- 531 1. Fuller R, Landrigan PJ, Balakrishnan K, Bathan G, Bose-O'Reilly S, Brauer M, et al.  
532 Pollution and health: a progress update. *Lancet Planet Health*. 2022 Jun 1;6(6):e535–47.
- 533 2. Landrigan PJ, Fuller R, Acosta NJR, Adeyi O, Arnold R, Basu N (Nil), et al. The Lancet  
534 Commission on pollution and health. *The Lancet*. 2018 Feb 3;391(10119):462–512.
- 535 3. Naidu R, Biswas B, Willett IR, Cribb J, Kumar Singh B, Paul Nathanail C, et al. Chemical  
536 pollution: A growing peril and potential catastrophic risk to humanity. *Environ Int*. 2021  
537 Nov 1;156:106616.
- 538 4. Cardinale BJ, Duffy JE, Gonzalez A, Hooper DU, Perrings C, Venail P, et al. Biodiversity  
539 loss and its impact on humanity. *Nature*. 2012 Jun;486(7401):59–67.
- 540 5. Stucki AO, Barton-Maclaren TS, Bhuller Y, Henriquez JE, Henry TR, Hirn C, et al. Use of  
541 new approach methodologies (NAMs) to meet regulatory requirements for the assessment  
542 of industrial chemicals and pesticides for effects on human health. *Front Toxicol* [Internet].

- 543 2022 [cited 2024 Feb 21];4. Available from:  
544 <https://www.frontiersin.org/articles/10.3389/ftox.2022.964553>
- 545 6. Harrill JA, Viant MR, Yauk CL, Sachana M, Gant TW, Auerbach SS, et al. Progress towards  
546 an OECD reporting framework for transcriptomics and metabolomics in regulatory  
547 toxicology. *Regul Toxicol Pharmacol RTP*. 2021 Oct;125:105020.
- 548 7. Hines A, Staff FJ, Widdows J, Compton RM, Falciani F, Viant MR. Discovery of metabolic  
549 signatures for predicting whole organism toxicology. *Toxicol Sci Off J Soc Toxicol*. 2010  
550 Jun;115(2):369–78.
- 551 8. Palmer JA, Smith AM, Gryshkova V, Donley ELR, Valentin JP, Burrier RE. A Targeted  
552 Metabolomics-Based Assay Using Human Induced Pluripotent Stem Cell-Derived  
553 Cardiomyocytes Identifies Structural and Functional Cardiotoxicity Potential. *Toxicol Sci*.  
554 2020 Apr;174(2):218–40.
- 555 9. European Chemicals Agency. The use of alternatives to testing on animals for the REACH  
556 Regulation [Internet]. European Chemicals Agency; 2020. Available from:  
557 <https://data.europa.eu/doi/10.2823/092305>
- 558 10. HOME - PrecisionTox [Internet]. [cited 2024 Feb 21]. Available from:  
559 <https://precisiontox.org/>
- 560 11. Ebert D. Daphnia as a versatile model system in ecology and evolution. *EvoDevo*. 2022 Aug  
561 8;13(1):16.
- 562 12. Miner BE, De Meester L, Pfrender ME, Lampert W, Hairston NG. Linking genes to  
563 communities and ecosystems: Daphnia as an ecogenomic model. *Proc R Soc B Biol Sci*.  
564 2012 May 22;279(1735):1873–82.
- 565 13. Stollewerk A. The water flea Daphnia - a “new” model system for ecology and evolution? *J*  
566 *Biol*. 2010 Jan 13;9(2):21.
- 567 14. Cuenca-Cambronero M, Pantel JH, Marshall H, Nguyen TTT, Tomero-Sanz H, Orsini L.  
568 Evolutionary mechanisms underpinning fitness response to multiple stressors in Daphnia.  
569 *Evol Appl*. 2021;14(10):2457–69.
- 570 15. Stoks R, Govaert L, Pauwels K, Jansen B, De Meester L. Resurrecting complexity: the  
571 interplay of plasticity and rapid evolution in the multiple trait response to strong changes in  
572 predation pressure in the water flea Daphnia magna. *Ecol Lett*. 2016;19(2):180–90.
- 573 16. Walsh MR, Packer M, Beston S, Funkhouser C, Gillis M, Holmes J, et al. Daphnia as a  
574 Model for Eco-evolutionary Dynamics. In: Thiel M, Wellborn GA, editors. *Life Histories:*  
575 *Volume 5* [Internet]. Oxford University Press; 2018 [cited 2024 Jan 3]. p. 0. Available  
576 from: <https://doi.org/10.1093/oso/9780190620271.003.0016>
- 577 17. Hebert PDN, Ward RD. Inheritance during parthenogenesis in Daphnia magna. *Genetics*.  
578 1972 Aug;71(4):639–42.

- 579 18. Kim HJ, Koedrith P, Seo YR. Ecotoxicogenomic approaches for understanding molecular  
580 mechanisms of environmental chemical toxicity using aquatic invertebrate, *Daphnia* model  
581 organism. *Int J Mol Sci*. 2015 May 29;16(6):12261–87.
- 582 19. Shaw JR, Pfrender ME, Eads BD, Klaper R, Callaghan A, Sibly RM, et al. *Daphnia* as an  
583 emerging model for toxicological genomics. In: Hogstrand C, Kille P, editors. *Advances in*  
584 *Experimental Biology* [Internet]. Elsevier; 2008 [cited 2021 Oct 8]. p. 165–328.  
585 (Comparative Toxicogenomics; vol. 2). Available from:  
586 <https://www.sciencedirect.com/science/article/pii/S1872242308000057>
- 587 20. Chaturvedi A, Li X, Dhandapani V, Marshall H, Kissane S, Cuenca-Cambronero M, et al.  
588 The hologenome of *Daphnia magna* reveals possible DNA methylation and microbiome-  
589 mediated evolution of the host genome. *Nucleic Acids Res*. 2023 Aug 28;51(18):9785–803.
- 590 21. Byeon E, Kim MS, Kim DH, Lee Y, Jeong H, Lee JS, et al. The freshwater water flea  
591 *Daphnia magna* NIES strain genome as a resource for CRISPR/Cas9 gene targeting: The  
592 glutathione S-transferase omega 2 gene. *Aquat Toxicol*. 2022 Jan 1;242:106021.
- 593 22. Lee BY, Choi BS, Kim MS, Park JC, Jeong CB, Han J, et al. The genome of the freshwater  
594 water flea *Daphnia magna*: A potential use for freshwater molecular ecotoxicology. *Aquat*  
595 *Toxicol*. 2019 May 1;210:69–84.
- 596 23. Campos B, Fletcher D, Piña B, Tauler R, Barata C. Differential gene transcription across the  
597 life cycle in *Daphnia magna* using a new all genome custom-made microarray. *BMC*  
598 *Genomics*. 2018 May 18;19:370.
- 599 24. Jankowski MD, Fairbairn DJ, Baller JA, Westerhoff BM, Schoenfuss HL. Using the *Daphnia*  
600 *magna* Transcriptome to Distinguish Water Source: Wetland and Stormwater Case Studies.  
601 *Environ Toxicol Chem*. 2022 Sep;41(9):2107–23.
- 602 25. Orsini L, Gilbert D, Podicheti R, Jansen M, Brown JB, Solari OS, et al. *Daphnia magna*  
603 transcriptome by RNA-Seq across 12 environmental stressors. *Sci Data*. 2016 May  
604 1;3:160030.
- 605 26. Majno G, Joris I. *Cells, tissues, and disease*: principles of general pathology. 2nd ed. New  
606 York: Oxford University Press; 2004. 1005 p.
- 607 27. Wester PW, Canton JH. The usefulness of histopathology in aquatic toxicity studies. *Comp*  
608 *Biochem Physiol Part C Comp Pharmacol*. 1991 Jan 1;100(1):115–7.
- 609 28. Huang J, Wang Q, Liu S, Zhang M, Liu Y, Sun L, et al. Crosstalk between histological  
610 alterations, oxidative stress and immune aberrations of the emerging PFOS alternative OBS  
611 in developing zebrafish. *Sci Total Environ*. 2021 Jun 20;774:145443.
- 612 29. Manjunatha B, Seo E, Bangyappagari D, Lee SJ. Histopathological and ultrastructural  
613 alterations reveal the toxicity of particulate matter (PM<sub>2.5</sub>) in adult zebrafish. *J Hazard*  
614 *Mater Adv*. 2022 Aug 1;7:100135.

- 615 30. Ramírez-Duarte W, Rondon Barragan I, Eslava-Mocha P. Acute toxicity and  
616 histopathological alterations of Roundup® herbicide on “cachama blanca” (*Piaractus*  
617 *brachyomus*). *Pesqui Veterinária Bras.* 2008 Nov 1;28:547.
- 618 31. Fraga N, Benito D, Briaudeau T, Izagirre U, Ruiz P. Toxicopathic effects of lithium in  
619 mussels. *Chemosphere.* 2022 Nov 1;307:136022.
- 620 32. Joshy A, Sharma SRK, Mini KG, Gangadharan S, Pranav P. Histopathological evaluation of  
621 bivalves from the southwest coast of India as an indicator of environmental quality. *Aquat*  
622 *Toxicol.* 2022 Feb 1;243:106076.
- 623 33. Phong Vo HN, Le GK, Hong Nguyen TM, Bui XT, Nguyen KH, Rene ER, et al.  
624 Acetaminophen micropollutant: Historical and current occurrences, toxicity, removal  
625 strategies and transformation pathways in different environments. *Chemosphere.* 2019  
626 Dec;236:124391.
- 627 34. Peranathan V, Shihana F, Chiew AL, George J, Dawson A, Buckley NA. Intestinal injury in  
628 paracetamol overdose (ATOM-8). *J Gastroenterol Hepatol.* 2023 Dec 27;
- 629 35. Yoon E, Babar A, Choudhary M, Kutner M, Pyrsopoulos N. Acetaminophen-Induced  
630 Hepatotoxicity: a Comprehensive Update. *J Clin Transl Hepatol.* 2016 Jun 28;4(2):131–42.
- 631 36. Zhang L, Baer KN. The influence of feeding, photoperiod and selected solvents on the  
632 reproductive strategies of the water flea, *Daphnia magna*. *Environ Pollut.* 2000 Dec  
633 1;110(3):425–30.
- 634 37. Copper JE, Budgeon LR, Foutz CA, van Rossum DB, Vanselow DJ, Hubley MJ, et al.  
635 Comparative analysis of fixation and embedding techniques for optimized histological  
636 preparation of zebrafish. *Comp Biochem Physiol Toxicol Pharmacol CBP.* 2018  
637 Jun;208:38–46.
- 638 38. Santana LMBM, Damasceno ÉP, Loureiro S, Soares AMVM, Pousão-Ferreira P, Abessa  
639 DMS, et al. An Easy-to-Use Histological Technique for Small Biological Samples of  
640 Senegalese Sole Larvae. *Appl Sci.* 2023 Jan;13(4):2346.
- 641 39. Sabaliauskas NA, Foutz CA, Mest JR, Budgeon LR, Sidor AT, Gershenson JA, et al. High-  
642 throughput zebrafish histology. *Methods.* 2006 Jul 1;39(3):246–54.
- 643 40. Copper JE, Budgeon LR, Foutz CA, van Rossum DB, Vanselow DJ, Hubley MJ, et al.  
644 Comparative analysis of fixation and embedding techniques for optimized histological  
645 preparation of zebrafish. *Comp Biochem Physiol Part C Toxicol Pharmacol.* 2018 Jun  
646 1;208:38–46.
- 647 41. Schindelin J, Arganda-Carreras I, Frise E, Kaynig V, Longair M, Pietzsch T, et al. Fiji: an  
648 open-source platform for biological-image analysis. *Nat Methods.* 2012 Jul;9(7):676–82.
- 649 42. Schneider CA, Rasband WS, Eliceiri KW. NIH Image to ImageJ: 25 years of image analysis.  
650 *Nat Methods.* 2012 Jul;9(7):671–5.



- 651 43. Fryer G. Functional morphology and the adaptive radiation of the Daphniidae  
652 (Branchiopoda: Anomopoda). *Philos Trans R Soc Lond B Biol Sci.* 1991 Jan  
653 29;331(1259):1–99.
- 654 44. Agar WE. The swimming setae of *Daphnia carinata*. *J Cell Sci.* 1950 Dec 1;s3-91(16):353–  
655 68.
- 656 45. Auld SKJR, Scholefield JA, Little TJ. Genetic variation in the cellular response of *Daphnia*  
657 *magna* (Crustacea: Cladocera) to its bacterial parasite. *Proc R Soc B Biol Sci.* 2010 Nov  
658 7;277(1698):3291–7.
- 659 46. Bednarska A. Adaptive changes in morphology of *Daphnia* filter appendages in response to  
660 food stress. *Polish Journal of Ecology.* 2006;54:663–8.
- 661 47. Benzie JAH. *The Genus Daphnia (including Daphniopsis) (Anomopoda:Daphniidae).*  
662 Kenobi Productions; 2005. 388 p.
- 663 48. Binder G. Das Muskelsystem von *Daphnia*. *Int Rev Gesamten Hydrobiol Hydrogr.*  
664 1931;26(1–2):54–98.
- 665 49. Christensen AK, Owusu NG, Jean-Louis D. Carapace epithelia are rich in large filamentous  
666 actin bundles in *Daphnia magna*, *Daphnia pulex*, and *Sida crystallina* (Crustacea:  
667 Cladocera). *Invertebr Biol.* 2018;137(1):49–59.
- 668 50. Consi TR, Macagno ER, Necles N. The oculomotor system of *Daphnia magna*. The eye  
669 muscles and their motor neurons. *Cell Tissue Res.* 1987 Mar;247(3):515–23.
- 670 51. Ebert D. Introduction to *Daphnia* Biology [Internet]. *Ecology, Epidemiology, and Evolution*  
671 *of Parasitism in Daphnia* [Internet]. National Center for Biotechnology Information (US);  
672 2005 [cited 2021 Mar 14]. Available from: <https://www.ncbi.nlm.nih.gov/books/NBK2042/>
- 673 52. Edwards C. The anatomy of *Daphnia* mandibles. *Trans Am Microsc Soc.* 1980;99(1):2–24.
- 674 53. Goldmann T, Becher B, Wiedorn KH, Pirow R, Deutschbein ME, Vollmer E, et al. Epipodite  
675 and fat cells as sites of hemoglobin synthesis in the branchiopod crustacean *Daphnia*  
676 *magna*. *Histochem Cell Biol.* 1999 Nov;112(5):335–9.
- 677 54. Halcrow K. The fine structure of the carapace integument of *Daphnia magna* Straus  
678 (Crustacea Branchiopoda). *Cell Tissue Res.* 1976 Jun 14;169(2):267–76.
- 679 55. Hiruta C, Tochinai S. Formation and structure of the ephippium (resting egg case) in relation  
680 to molting and egg laying in the water flea *Daphnia pulex* De Geer (Cladocera:  
681 Daphniidae). *J Morphol.* 2014 Jul;275(7):760–7.
- 682 56. Kikuchi S. The fine structure of the gill epithelium of a fresh-water flea, *Daphnia magna*  
683 (Crustacea: Phyllopoada) and changes associated with acclimation to various salinities. I.  
684 Normal fine structure. *Cell Tissue Res.* 1983;229(2):253–68.

- 685 57. Kress T, Harzsch S, Dircksen H. Neuroanatomy of the optic ganglia and central brain of the  
686 water flea *Daphnia magna* (Crustacea, Cladocera). *Cell Tissue Res.* 2016 Mar  
687 1;363(3):649–77.
- 688 58. McCoolle MD, Baer KN, Christie AE. Histaminergic signaling in the central nervous system  
689 of *Daphnia* and a role for it in the control of phototactic behavior. *J Exp Biol.* 2011 May  
690 15;214(Pt 10):1773–82.
- 691 59. Metschnikoff E. A disease of *Daphnia* caused by a yeast. A contribution to the theory of  
692 phagocytes as agents for attack on disease-causing organisms. *Archiv Pathol Anat Physiol*  
693 *Klin Med.* 1884;96:177–95.
- 694 60. Rossi F. Comparative observations on the female reproductive system and parthenogenetic  
695 oogenesis in Cladocera. *Bolletino Zool.* 1980 Jan;47(1–2):21–38.
- 696 61. Schultz TW, Kennedy JR. The fine structure of the digestive system of *Daphnia pulex*  
697 (Crustacea: Cladocera). *Tissue Cell.* 1976 Jan 1;8(3):479–90.
- 698 62. Smirnov NN. Physiology of the Cladocera. *Physiol Cladocera.* 2013 Oct 1;1–336.
- 699 63. Stein RJ, Richter WR, Zussman RA, Brynjolfsson G. Ultrastructural characterization of  
700 *Daphnia* heart muscle. *J Cell Biol.* 1966 Apr 1;29(1):168–70.
- 701 64. Steinsland AJ. Heart ultrastructure in *Daphnia pulex* De Geer (Crustacea, Branchiopoda,  
702 Cladocera). *J Crustac Biol.* 1982;2(1):54–8.
- 703 65. Quaglia A, Sabelli B, Villani L. Studies on the intestine of Daphnidae (Crustacea, Cladocera)  
704 ultrastructure of the midgut of *Daphnia magna* and *Daphnia obtusa*. *J Morphol.*  
705 1976;150(3):711–25.
- 706 66. Weiss LC, Tollrian R, Herbert Z, Laforsch C. Morphology of the *Daphnia* nervous system: a  
707 comparative study on *Daphnia pulex*, *Daphnia lumholtzi*, and *Daphnia longicephala*. *J*  
708 *Morphol.* 2012 Dec;273(12):1392–405.
- 709 67. Wuerz M, Huebner E, Huebner J. The morphology of the male reproductive system,  
710 spermatogenesis and the spermatozoon of *Daphnia magna* (Crustacea: Branchiopoda). *J*  
711 *Morphol.* 2017 Nov;278(11):1536–50.
- 712 68. Zaffagnini F, Zeni C. Considerations on some cytological and ultrastructural observations on  
713 fat cells of *Daphnia* (Crustacea, Cladocera). *Bollettino di zoologia.* 1986;53(1):33–9.
- 714 69. Zaffagnini F, Zeni C. Ultrastructural investigations on the labral glands of *Daphnia obtusa*  
715 (Crustacea, Cladocera). *J Morphol.* 1987 Jul;193(1):23–33.
- 716 70. Zeni C, Franchini A. A preliminary histochemical study on the labral glands of *Daphnia*  
717 *obtusa* (Crustacea, Cladocera). *Acta Histochem.* 1990;88:175–81.

- 718 71. Rieder N. The ultrastructure of the so-called olfactory setae on the antennula of *Daphnia*  
719 magna Straus (Crustacea, Cladocera). In: Forró L, Frey DG, editors. Cladocera. Dordrecht:  
720 Springer Netherlands; 1987. p. 175–81. (Developments in Hydrobiology).
- 721 72. Klann M, Stollewerk A. Evolutionary variation in neural gene expression in the developing  
722 sense organs of the crustacean *Daphnia magna*. *Dev Biol*. 2017 Apr 1;424(1):50–61.
- 723 73. Decaestecker E, De Meester L, Mergeay J. Cyclical parthenogenesis in *Daphnia*: sexual  
724 versus asexual reproduction. In: Schön I, Martens K, Dijk P, editors. Lost Sex: The  
725 Evolutionary Biology of Parthenogenesis [Internet]. Dordrecht: Springer Netherlands; 2009  
726 [cited 2022 Jan 21]. p. 295–316. Available from: [https://doi.org/10.1007/978-90-481-2770-](https://doi.org/10.1007/978-90-481-2770-2_15)  
727 [2\\_15](https://doi.org/10.1007/978-90-481-2770-2_15)
- 728 74. Chen L, Barnett RE, Horstmann M, Bamberger V, Heberle L, Krebs N, et al. Mitotic activity  
729 patterns and cytoskeletal changes throughout the progression of diapause developmental  
730 program in *Daphnia*. *BMC Cell Biol*. 2018 Dec 29;19:30.
- 731 75. Cáceres CE. Interspecific variation in the abundance, production, and emergence of *Daphnia*  
732 diapausing eggs. *Ecology*. 1998;79(5):1699–710.
- 733 76. Mergeay J, Verschuren D, Kerckhoven LV, Meester LD. Two hundred years of a diverse  
734 *Daphnia* community in Lake Naivasha (Kenya): effects of natural and human-induced  
735 environmental changes. *Freshw Biol*. 2004;49(8):998–1013.
- 736 77. Arbačiauskas K, Gasiūnaitė ZR. Growth and fecundity of *Daphnia* after diapause and their  
737 impact on the development of a population. *Hydrobiologia*. 1996 Mar 1;320(1):209–22.
- 738 78. Cambronero MC, Orsini L. Resurrection of Dormant *Daphnia magna*: Protocol and  
739 Applications. *JoVE J Vis Exp*. 2018 Jan 19;(131):e56637.
- 740 79. Beaton MJ, Hebert PDN. Miniature genomes and endopolyploidy in cladoceran crustaceans.  
741 *Genome*. 1989 Dec 1;32(6):1048–53.
- 742 80. Environmental Protection Agency. Methods for Measuring the Acute Toxicity of Effluents  
743 and Receiving Waters to Freshwater and Marine Organisms. 2002.
- 744 81. OECD. Test No. 202: *Daphnia* sp. Acute Immobilisation Test [Internet]. Paris: Organisation  
745 for Economic Co-operation and Development; 2004 [cited 2021 Nov 4]. Available from:  
746 [https://www.oecd-ilibrary.org/environment/test-no-202-daphnia-sp-acute-immobilisation-](https://www.oecd-ilibrary.org/environment/test-no-202-daphnia-sp-acute-immobilisation-test_9789264069947-en)  
747 [test\\_9789264069947-en](https://www.oecd-ilibrary.org/environment/test-no-202-daphnia-sp-acute-immobilisation-test_9789264069947-en)
- 748 82. Environmental Protection Agency. Ecological Effects Test Guidelines OCSPP850.1300:  
749 *Daphnid* chronic toxicity test. 1996.
- 750 83. OECD. *Daphnia magna* Reproduction Test (OECD TG 211) [Internet]. Paris: OECD; 2018  
751 Sep [cited 2021 Nov 4] p. 253–63. Available from: [https://www.oecd-](https://www.oecd-ilibrary.org/environment/revised-guidance-document-150-on-standardised-test-guidelines-)  
752 [ilibrary.org/environment/revised-guidance-document-150-on-standardised-test-guidelines-](https://www.oecd-ilibrary.org/environment/revised-guidance-document-150-on-standardised-test-guidelines-)

- 753 for-evaluating-chemicals-for-endocrine-disruption/daphnia-magna-reproduction-test-oecd-  
754 tg-211\_9789264304741-12-en
- 755 84. Tkaczyk A, Bownik A, Dudka J, Kowal K, Ślaska B. *Daphnia magna* model in the toxicity  
756 assessment of pharmaceuticals: A review. *Sci Total Environ*. 2021 Apr 1;763:143038.
- 757 85. Bacchetta R, Santo N, Marelli M, Nosengo G, Tremolada P. Chronic toxicity effects of  
758 ZnSO<sub>4</sub> and ZnO nanoparticles in *Daphnia magna*. *Environ Res*. 2017 Jan 1;152:128–40.
- 759 86. Bodar CWM, van Donselaar EG, Herwig HJ. Cytopathological investigations of digestive  
760 tract and storage cells in *Daphnia magna* exposed to cadmium and tributyltin. *Aquat*  
761 *Toxicol*. 1990 Oct 1;17(4):325–37.
- 762 87. Heinlaan M, Kahru A, Kasemets K, Arbeille B, Prensier G, Dubourguier HC. Changes in the  
763 *Daphnia magna* midgut upon ingestion of copper oxide nanoparticles: A transmission  
764 electron microscopy study. *Water Res*. 2011 Jan 1;45(1):179–90.
- 765 88. Yang XY, Edelmann RE, Oris JT. Suspended C60 nanoparticles protect against short-term  
766 UV and fluoranthene photo-induced toxicity, but cause long-term cellular damage in  
767 *Daphnia magna*. *Aquat Toxicol*. 2010 Oct 15;100(2):202–10.
- 768 89. Daniel D, Dionísio R, de Alkimin GD, Nunes B. Acute and chronic effects of paracetamol  
769 exposure on *Daphnia magna*: how oxidative effects may modulate responses at distinct  
770 levels of organization in a model species. *Environ Sci Pollut Res*. 2019 Feb 1;26(4):3320–9.
- 771 90. Du J, Mei CF, Ying GG, Xu MY. Toxicity Thresholds for Diclofenac, Acetaminophen and  
772 Ibuprofen in the Water Flea *Daphnia magna*. *Bull Environ Contam Toxicol*. 2016  
773 Jul;97(1):84–90.
- 774 91. de Oliveira LLD, Antunes SC, Gonçalves F, Rocha O, Nunes B. Acute and chronic  
775 ecotoxicological effects of four pharmaceuticals drugs on cladoceran *Daphnia magna*. *Drug*  
776 *Chem Toxicol*. 2016;39(1):13–21.
- 777 92. Heckmann LH, Connon R, Hutchinson TH, Maund SJ, Sibly RM, Callaghan A. Expression  
778 of target and reference genes in *Daphnia magna* exposed to ibuprofen. *BMC Genomics*.  
779 2006 Dec;7(1):175.
- 780 93. Lari E, Jeong TY, Labine LM, Simpson MJ. Metabolomic analysis predicted changes in  
781 growth rate in *Daphnia magna* exposed to acetaminophen. *Aquat Toxicol Amst Neth*. 2022  
782 Aug;249:106233.
- 783 94. Abdullahi M, Li X, Abdallah MAE, Stubbings W, Yan N, Barnard M, et al. *Daphnia* as a  
784 Sentinel Species for Environmental Health Protection: A Perspective on Biomonitoring and  
785 Bioremediation of Chemical Pollution. *Environ Sci Technol*. 2022 Oct 18;56(20):14237–  
786 48.



- 787 95. Colbourne JK, Shaw JR, Sostare E, Rivetti C, Derelle R, Barnett R, et al. Toxicity by  
788 descent: A comparative approach for chemical hazard assessment. *Environ Adv.* 2022 Oct  
789 1;9:100287.
- 790 96. Cheng KC, Burdine RD, Dickinson ME, Ekker SC, Lin AY, Lloyd KCK, et al. Promoting  
791 validation and cross-phylogenetic integration in model organism research. *Dis Model*  
792 *Mech.* 2022 Sep 20;15(9):dmm049600.
- 793 97. Haney JF, Hall DJ. Sugar-coated Daphnia: A preservation technique for Cladocera1. *Limnol*  
794 *Oceanogr.* 1973;18(2):331–3.
- 795
